# Supplementary material
Source: PubMed Central journal article supplement (PMC8159174)

# **Rapid Construction of Tetralin, Chromane, and Indane Motifs via Cyclative C–H/C–H Coupling: Four-Step Total Synthesis of (±)-Russujaponol F**

Zhe Zhuang,<sup>1</sup> Alastair N. Herron,<sup>1</sup> Shuang Liu,<sup>1</sup> and Jin-Quan Yu<sup>1\*</sup>

<sup>1</sup>Department of Chemistry, The Scripps Research Institute, 10550 N. Torrey Pines Road, La Jolla, CA 92037, United States

## **Table of Contents**

|                                                                                             |     |
|---------------------------------------------------------------------------------------------|-----|
| General Information                                                                         | S2  |
| Experimental Section                                                                        |     |
| Preparation of aliphatic acids                                                              | S3  |
| Preparation of mono- <i>N</i> -protected β-amino acid ligand                                | S5  |
| Table S1. Oxidant investigation for the cyclative C–H/C–H coupling reaction                 | S6  |
| Table S2. Base screening for the cyclative C–H/C–H coupling reaction                        | S7  |
| Table S3. Ligand investigation for the cyclative C–H/C–H coupling reaction                  | S8  |
| Table S4. Comparison between LiOAc and NaOAc under the standard conditions                  | S9  |
| Table S5. Conditions investigation for the cyclative C–H/C–H coupling reaction of <b>1v</b> | S10 |
| Table S6. Base and Ag salt investigation for arylation                                      | S11 |
| General procedure for the cyclative C–H/C–H coupling reaction                               | S12 |
| Substrate scope of the cyclative C–H/C–H coupling reaction                                  | S13 |
| Total synthesis of (±)-russujaponol F                                                       | S24 |
| KIE experiments                                                                             | S28 |
| References                                                                                  | S30 |
| <sup>1</sup> H and <sup>13</sup> C NMR Spectra                                              | S32 |

## General Information

$\text{Pd}(\text{OAc})_2$ ,  $\text{LiOAc}$ ,  $\text{Ag}_2\text{CO}_3$ , and sodium percarbonate ( $\text{Na}_2\text{CO}_3 \cdot 1.5\text{H}_2\text{O}_2$ ) were purchased from Sigma-Aldrich.  $\text{Pd}(\text{CH}_3\text{CN})_4(\text{BF}_4)_2$  was purchased from Strem. 1-Fluoro-2,4,6-trimethylpyridinium tetrafluoroborate was purchased from TCI. HFIP was purchased from Oakwood. Other reagents were purchased at the highest commercial quality and used without further purification, unless otherwise stated. Analytical thin layer chromatography was performed on 0.25 mm silica gel 60-F254. Visualization was carried out with short-wave UV light or  $\text{KMnO}_4$  and heat as developing agents.  $^1\text{H}$  NMR spectra were recorded on Bruker DRX-600 instrument. Chemical shifts were quoted in parts per million (ppm) referenced to 0.00 ppm for TMS. The following abbreviations (or combinations thereof) were used to explain multiplicities: s = singlet, d = doublet, t = triplet, q = quartet, m = multiplet, br = broad. Coupling constants,  $J$ , were reported in Hertz unit (Hz).  $^{13}\text{C}$  NMR spectra were recorded on Bruker DRX-600 was fully decoupled by broad band proton decoupling. Chemical shifts were reported in ppm referenced to the center line of a triplet at 77.16 ppm of  $\text{CDCl}_3$ . Column chromatography was performed using E. Merck silica (60, particle size 0.043–0.063 mm), and preparative thin layer chromatography (pTLC) was performed on Merck silica plates (60F-254). High-resolution mass spectra (HRMS) were recorded on an Agilent Mass spectrometer using ESI-TOF (electrospray ionization-time of flight).

## Preparation of aliphatic acids

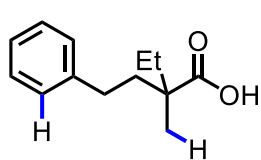

**1a**

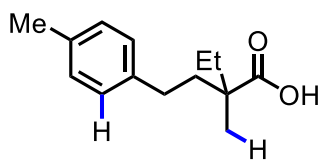

**1b**

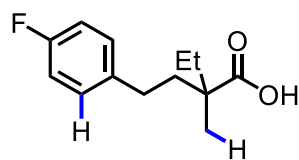

**1c**

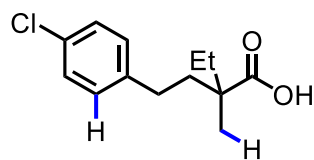

**1d**

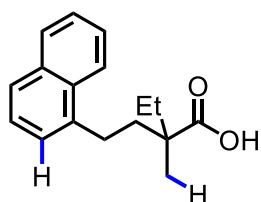

**1e**

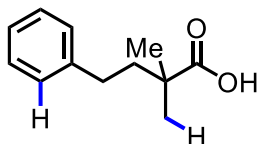

**1f**

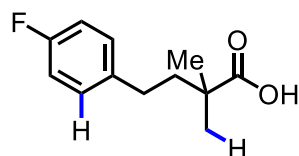

**1g**

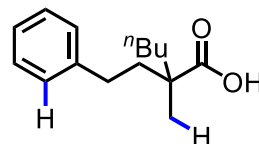

**1h**

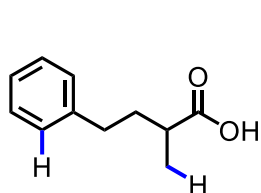

**1i**

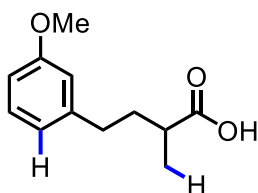

**1j**

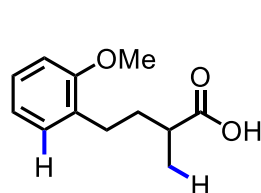

**1k**

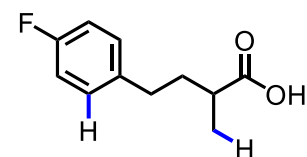

**1l**

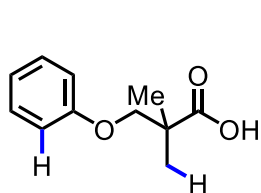

**1m**

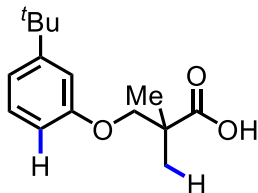

**1n**

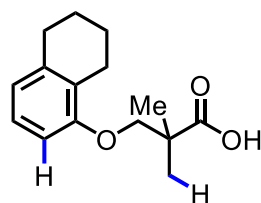

**1o**

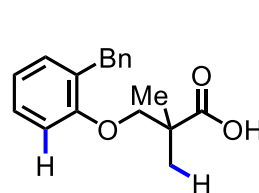

**1p**

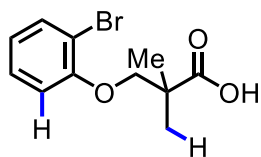

**1q**

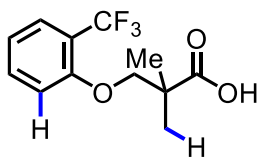

**1r**

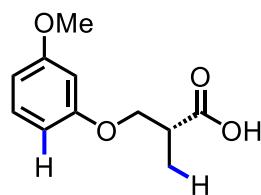

**1s**

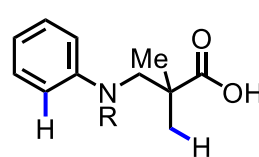

R = Boc or Ts  
**1t**

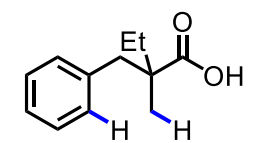

**1u**

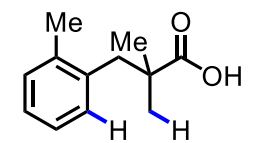

**1v**

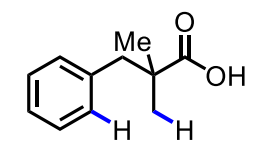

**1w**

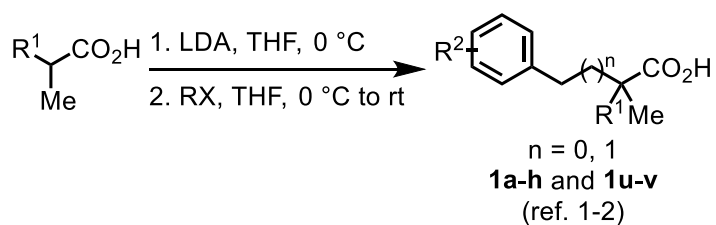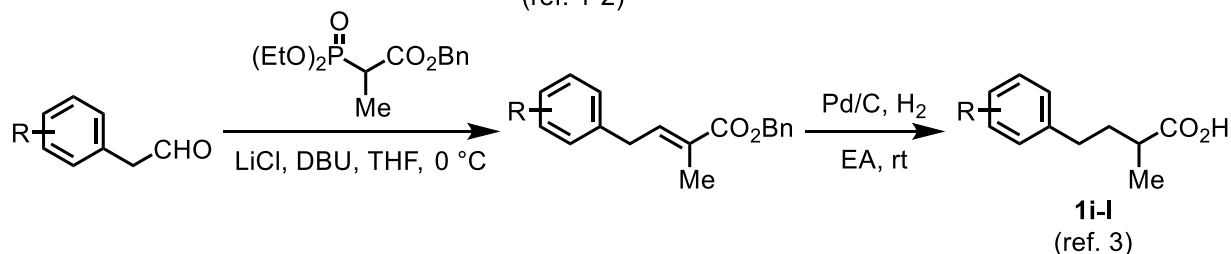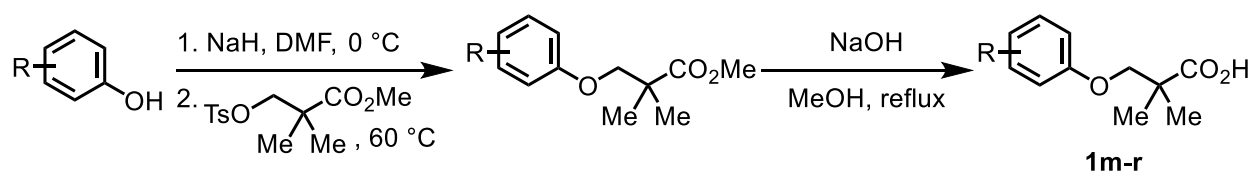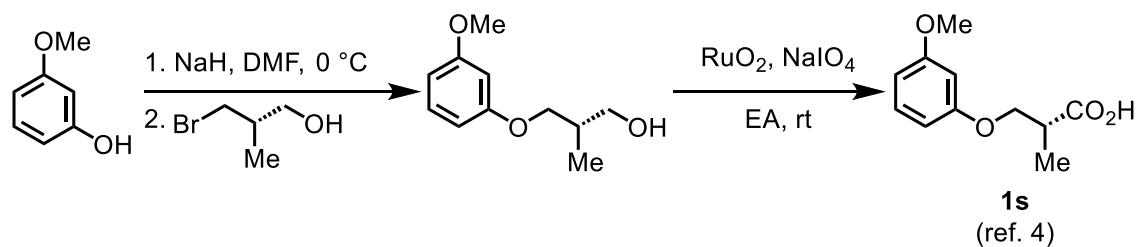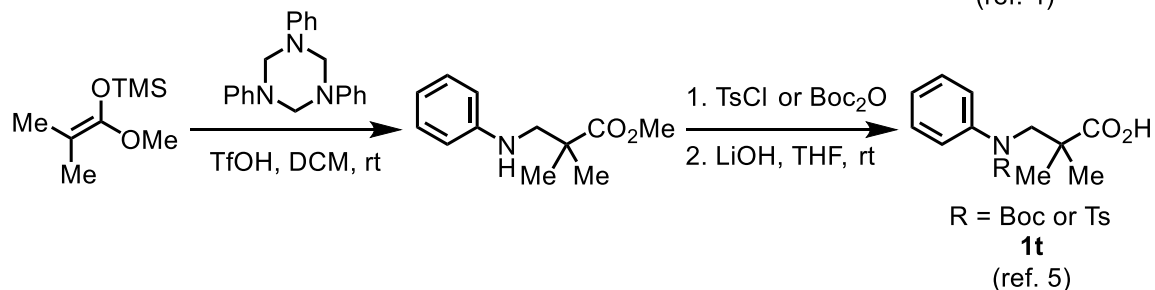

Aliphatic carboxylic acids were synthesized following literature procedures<sup>1-5</sup> (**1a–1v**) or obtained from the commercial source (**1w**).

### Preparation of mono-*N*-protected $\beta$ -amino acid ligand

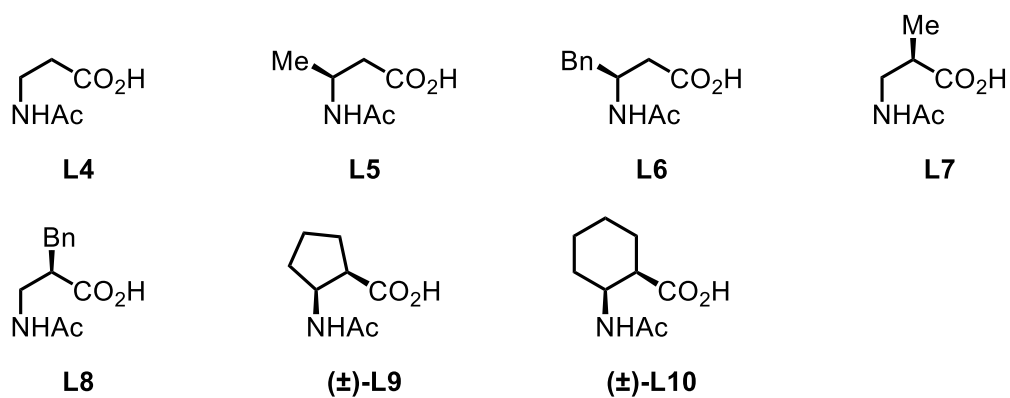

**L4–L10** were commercially available (**L4**) or synthesized following literature procedures<sup>6–9</sup> (**L5–L10**).

**Table S1. Oxidant investigation for the cyclative C–H/C–H coupling reaction<sup>a,b</sup>**

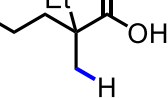

**1a**

$\text{Pd(OAc)}_2$  (10 mol%)  
**L4** (10 mol%)  
 $\text{NaOAc}$  (1.0 equiv)  
 oxidant (2.0 equiv)  
 HFIP, 60 °C, 12 h

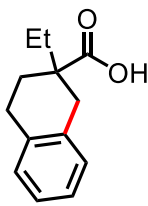

**2a**

| entry | oxidant                                                           | yield (%) | entry | oxidant                                       | yield (%) |
|-------|-------------------------------------------------------------------|-----------|-------|-----------------------------------------------|-----------|
| 1     | w/o                                                               | 0         | 10    | CMHP                                          | 22        |
| 2     | AcOO <sup>t</sup> Bu                                              | 38        | 11    | TBHP (70% in water)                           | 50        |
| 3     | BzOO <sup>t</sup> Bu                                              | 0         | 12    | TBHP (ca. 5.5 M in decane)                    | 53        |
| 4     | BzOOBz                                                            | 0         | 13    | K <sub>2</sub> S <sub>2</sub> O <sub>8</sub>  | 5         |
| 5     | Lauroyl peroxide                                                  | 0         | 14    | Na <sub>2</sub> S <sub>2</sub> O <sub>8</sub> | 0         |
| 6     | <sup>t</sup> BuOO <sup>t</sup> Bu                                 | 0         | 15    | Oxone                                         | 0         |
| 7     | H <sub>2</sub> O <sub>2</sub> in water                            | 0         | 16    | Selectfluor                                   | 32        |
| 8     | UHP                                                               | 0         | 17    | NFSI                                          | 0         |
| 9     | Na <sub>2</sub> CO <sub>3</sub> ·1.5H <sub>2</sub> O <sub>2</sub> | 56        | 18    | FTMP                                          | 0         |

<sup>a</sup>Conditions: **1a** (0.1 mmol), Pd(OAc)<sub>2</sub> (10 mol%), **L4** (10 mol%), NaOAc (1.0 equiv), Na<sub>2</sub>CO<sub>3</sub>·1.5H<sub>2</sub>O<sub>2</sub> (2.0 equiv), HFIP (1.0 mL), 60 °C, 12 h. <sup>b</sup>The yields were determined by <sup>1</sup>H NMR analysis of the crude product using CH<sub>2</sub>Br<sub>2</sub> as the internal standard.

**Table S2. Base screening for the cyclative C–H/C–H coupling reaction<sup>a,b</sup>**

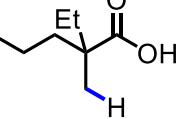

**1a**

$\text{Pd}(\text{OAc})_2$  (10 mol%)  
**L4** (10 mol%)

base (1.0 equiv)  
 $\text{Na}_2\text{CO}_3 \cdot 1.5\text{H}_2\text{O}_2$  (2.0 equiv)  
 HFIP, 60 °C, 12 h

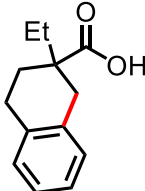

**2a**

| entry | base                      | yield (%) | entry | base                     | yield (%) |
|-------|---------------------------|-----------|-------|--------------------------|-----------|
| 1     | w/o                       | 50        | 6     | $\text{Na}_3\text{PO}_4$ | 49        |
| 2     | $\text{NaHCO}_3$          | 45        | 7     | $\text{NaOAc}$           | 56        |
| 3     | $\text{Na}_2\text{CO}_3$  | 44        | 8     | $\text{LiOAc}$           | 57        |
| 4     | $\text{NaH}_2\text{PO}_4$ | 36        | 9     | $\text{KOAc}$            | 50        |
| 5     | $\text{Na}_2\text{HPO}_4$ | 45        | 10    | $\text{CsOAc}$           | 41        |

<sup>a</sup>Conditions: **1a** (0.1 mmol),  $\text{Pd}(\text{OAc})_2$  (10 mol%), **L4** (10 mol%), base (1.0 equiv),  $\text{Na}_2\text{CO}_3 \cdot 1.5\text{H}_2\text{O}_2$  (2.0 equiv), HFIP (1.0 mL), 60 °C, 12 h. <sup>b</sup>The yields were determined by  $^1\text{H}$  NMR analysis of the crude product using  $\text{CH}_2\text{Br}_2$  as the internal standard. The conversions were determined by  $^1\text{H}$  NMR analysis of the remaining **1a**.

**Table S3. Ligand investigation for the cyclative C–H/C–H coupling reaction<sup>a,b</sup>**

|                                                                                                                                                                                                                                                                                                                                                                                                                                                                                                                                                                                                                                                                                                       |                                                                                    |                                                                                     |                                                                                      |
|-------------------------------------------------------------------------------------------------------------------------------------------------------------------------------------------------------------------------------------------------------------------------------------------------------------------------------------------------------------------------------------------------------------------------------------------------------------------------------------------------------------------------------------------------------------------------------------------------------------------------------------------------------------------------------------------------------|------------------------------------------------------------------------------------|-------------------------------------------------------------------------------------|--------------------------------------------------------------------------------------|
| <div style="display: flex; align-items: center; justify-content: space-around;"> <div style="text-align: center;"> 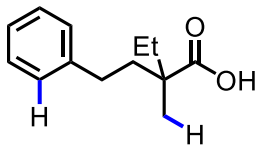 <p><b>1a</b></p> </div> <div style="text-align: center;"> <math>\xrightarrow[\text{HFIP, 60 } ^\circ\text{C, 12 h}]{\begin{array}{c} \text{Pd(OAc)}_2 \text{ (10 mol\%)} \\ \text{ligand (L) (10 mol\%)} \\ \text{LiOAc (1.0 equiv)} \\ \text{Na}_2\text{CO}_3 \cdot 1.5\text{H}_2\text{O}_2 \text{ (2.0 equiv)} \end{array}}</math> </div> <div style="text-align: center;"> 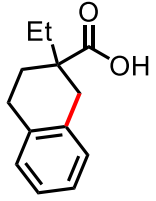 <p><b>2a</b></p> </div> </div> |                                                                                    |                                                                                     |                                                                                      |
| w/o ligand(L)                                                                                                                                                                                                                                                                                                                                                                                                                                                                                                                                                                                                                                                                                         | 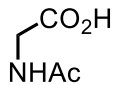  | 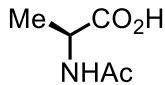  | 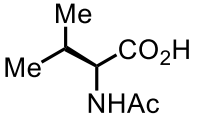  |
| 23%                                                                                                                                                                                                                                                                                                                                                                                                                                                                                                                                                                                                                                                                                                   | <b>L1</b> , 19%                                                                    | <b>L2</b> , 45%                                                                     | <b>L3</b> , 39%                                                                      |
| 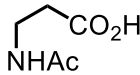                                                                                                                                                                                                                                                                                                                                                                                                                                                                                                                                                                                                                     | 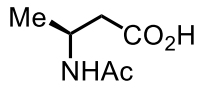  | 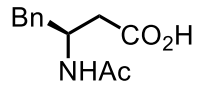  | 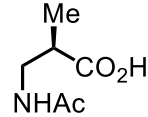  |
| <b>L4</b> , 57%                                                                                                                                                                                                                                                                                                                                                                                                                                                                                                                                                                                                                                                                                       | <b>L5</b> , 53%                                                                    | <b>L6</b> , 62%                                                                     | <b>L7</b> , 63%                                                                      |
| 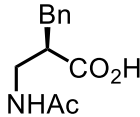                                                                                                                                                                                                                                                                                                                                                                                                                                                                                                                                                                                                                    | 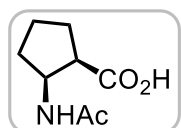 | 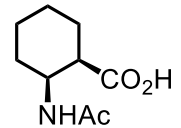 | 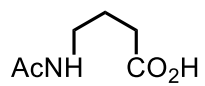 |
| <b>L8</b> , 54%                                                                                                                                                                                                                                                                                                                                                                                                                                                                                                                                                                                                                                                                                       | <b>(±)-L9</b> , 75%(78% <sup>c</sup> )                                             | <b>(±)-L10</b> , 63%                                                                | <b>L11</b> , 20%                                                                     |

<sup>a</sup>Conditions: **1a** (0.1 mmol), Pd(OAc)<sub>2</sub> (10 mol%), ligand (**L**) (10 mol%), LiOAc (1.0 equiv), Na<sub>2</sub>CO<sub>3</sub>·1.5H<sub>2</sub>O<sub>2</sub> (2.0 equiv), HFIP (1.0 mL), 60 °C, 12 h. <sup>b</sup>The yields were determined by <sup>1</sup>H NMR analysis of the crude product using CH<sub>2</sub>Br<sub>2</sub> as the internal standard. <sup>c</sup>Isolated yield.

**Table S4. Comparison between LiOAc and NaOAc under the standard conditions<sup>a,b</sup>**

$\text{Pd(OAc)}_2$  (10 mol%)  
 $(\pm)\text{-L9}$  (10 mol%)  
 base (1.0 equiv)  
 $\text{Na}_2\text{CO}_3 \cdot 1.5\text{H}_2\text{O}_2$  (2.0 equiv)  
 HFIP, 60 °C, 12 h

**1**  **2**

| entry | <b>1</b>  | yield using LiOAc (%) | yield using NaOAc (%) |
|-------|-----------|-----------------------|-----------------------|
| 1     | <b>1a</b> | 78                    | 61                    |
| 2     | <b>1d</b> | 58                    | 45                    |
| 3     | <b>1i</b> | 63                    | 45                    |
| 4     | <b>1n</b> | 80                    | 77                    |
| 5     | <b>1u</b> | 53                    | 44                    |

<sup>a</sup>Conditions: **1** (0.1 mmol), Pd(OAc)<sub>2</sub> (10 mol%), (±)-**L9** (10 mol%), base (1.0 equiv), Na<sub>2</sub>CO<sub>3</sub>·1.5H<sub>2</sub>O<sub>2</sub> (2.0 equiv), HFIP (1.0 mL), 60 °C, 12 h. <sup>b</sup>Isolated yields.

**Table S5. Conditions investigation for the cyclative C–H/C–H coupling reaction<sup>a,b</sup>**

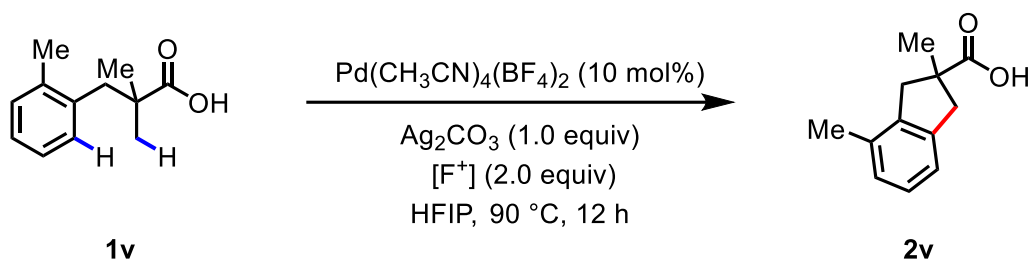

| entry | variation from standard conditions B                                                    | yield (%)             |
|-------|-----------------------------------------------------------------------------------------|-----------------------|
| 1     | none                                                                                    | 55 (61 <sup>c</sup> ) |
| 2     | w/o $\text{Ag}_2\text{CO}_3$                                                            | 0                     |
| 3     | $\text{Na}_2\text{CO}_3$ instead of $\text{Ag}_2\text{CO}_3$                            | 0                     |
| 4     | $\text{LiOAc}$ instead of $\text{Ag}_2\text{CO}_3$                                      | 0                     |
| 5     | $\text{Pd}(\text{OAc})_2$ instead of $\text{Pd}(\text{CH}_3\text{CN})_4(\text{BF}_4)_2$ | 23                    |
| 6     | w/ ( $\pm$ )- <b>L9</b> (10 mol%)                                                       | 34                    |
| 7     | standard conditions A                                                                   | 23                    |

<sup>a</sup>Conditions: **1v** (0.1 mmol),  $\text{Pd}(\text{CH}_3\text{CN})_4(\text{BF}_4)_2$  (10 mol%),  $\text{Ag}_2\text{CO}_3$  (1.0 equiv),  $[\text{F}^+] = 1$ -fluoro-2,4,6-trimethylpyridinium tetrafluoroborate (2.0 equiv), HFIP (1.0 mL), 90 °C, 12 h. <sup>b</sup>The yields were determined by <sup>1</sup>H NMR analysis of the crude product using  $\text{CH}_2\text{Br}_2$  as the internal standard. <sup>c</sup>Isolated yield.

**Table S6. Base and Ag salt investigation for arylation<sup>a,b</sup>**

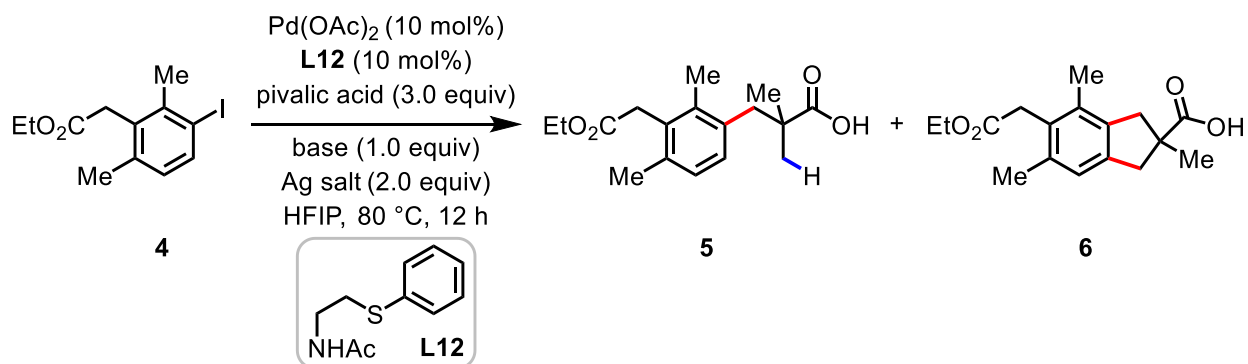

| entry | base                                                | Ag salt                         | <b>5 + 6</b> yield (%)                      |
|-------|-----------------------------------------------------|---------------------------------|---------------------------------------------|
| 1     | Na <sub>2</sub> HPO <sub>4</sub> ·7H <sub>2</sub> O | Ag <sub>2</sub> CO <sub>3</sub> | 52 + 4                                      |
| 2     | Na <sub>2</sub> HPO <sub>4</sub> ·7H <sub>2</sub> O | Ag <sub>2</sub> O               | 52 + 3                                      |
| 3     | Na <sub>2</sub> HPO <sub>4</sub> ·7H <sub>2</sub> O | AgOAc                           | 44 + 0                                      |
| 4     | NaHCO <sub>3</sub>                                  | Ag <sub>2</sub> CO <sub>3</sub> | 41 + 5                                      |
| 5     | Na <sub>2</sub> CO <sub>3</sub>                     | Ag <sub>2</sub> CO <sub>3</sub> | 50 + 5                                      |
| 6     | Na <sub>2</sub> HPO <sub>4</sub>                    | Ag <sub>2</sub> CO <sub>3</sub> | 47 + 4                                      |
| 7     | Na <sub>3</sub> PO <sub>4</sub>                     | Ag <sub>2</sub> CO <sub>3</sub> | 46 + 2                                      |
| 8     | NaOAc                                               | Ag <sub>2</sub> CO <sub>3</sub> | 65 + 5                                      |
| 9     | LiOAc                                               | Ag <sub>2</sub> CO <sub>3</sub> | 64 + 8                                      |
| 10    | KOAc                                                | Ag <sub>2</sub> CO <sub>3</sub> | 46 + 10                                     |
| 11    | CsOAc                                               | Ag <sub>2</sub> CO <sub>3</sub> | 61(62 <sup>c</sup> ) + 12(12 <sup>c</sup> ) |
| 12    | CsOAc                                               | w/o                             | 0                                           |
| 13    | w/o                                                 | Ag <sub>2</sub> CO <sub>3</sub> | 0                                           |

<sup>a</sup>Conditions: **4** (0.1 mmol), pivalic acid (3.0 equiv), Pd(OAc)<sub>2</sub> (10 mol%), **L12** (10 mol%), base (1.0 equiv), Ag salt (2.0 equiv), HFIP (1.0 mL), 80 °C, 12 h. <sup>b</sup>The yields were determined by <sup>1</sup>H NMR analysis of the crude product using CH<sub>2</sub>Br<sub>2</sub> as the internal standard. <sup>c</sup>Isolated yields.

## General procedure for the cyclative C–H/C–H coupling reaction

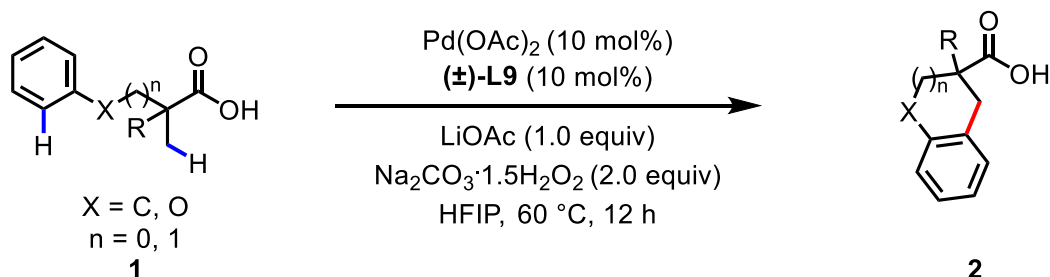

**General Procedure A:** In the culture tube,  $\text{Pd}(\text{OAc})_2$  (10 mol%, 2.2 mg), ligand  $(\pm)\text{-L9}$  (10 mol%, 1.7 mg),  $\text{LiOAc}$  (1.0 equiv, 6.6 mg),  $\text{Na}_2\text{CO}_3 \cdot 1.5\text{H}_2\text{O}_2$  (2.0 equiv, 31.4 mg), and **1** (0.1 mmol) in order were weighed in air and placed with a magnetic stir bar. Then HFIP (1.0 mL) was added. The reaction mixture was stirred at rt for 3 min, and then heated to 60 °C for 12 h (600 rpm). After being allowed to cool to room temperature, the mixture was treated with  $\text{HCO}_2\text{H}$  (0.1 mL) and concentrated *in vacuo*. The crude mixture was purified by pTLC (hexane/EA with 1% AcOH) to afford the product **2**.

**General Procedure B:** In the culture tube,  $\text{Pd}(\text{CH}_3\text{CN})_4(\text{BF}_4)_2$  (10 mol%, 4.4 mg),  $\text{Ag}_2\text{CO}_3$  (1.0 equiv, 27.4 mg), 1-fluoro-2,4,6-trimethylpyridinium tetrafluoroborate (2.0 equiv, 45.4 mg), and **1** (0.1 mmol) in order were weighed in air and placed with a magnetic stir bar. Then HFIP (1.0 mL) was added. The reaction mixture was stirred at rt for 3 min, and then heated to 90 °C for 12 h (600 rpm). After being allowed to cool to room temperature, the mixture was treated with  $\text{HCO}_2\text{H}$  (0.1 mL), diluted with DCM, filtered through a Celite plug, and concentrated *in vacuo*. The crude mixture was purified by pTLC (hexane/EA with 1% AcOH) to afford the product **2**.

### Substrate scope of the cyclative C–H/C–H coupling reaction

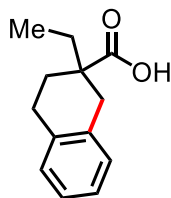

#### 2-Ethyl-1,2,3,4-tetrahydronaphthalene-2-carboxylic acid (2a)

Following **General Procedure A** on 0.1 mmol scale. Purification by pTLC afforded the title compound (colorless oil, 16.0 mg, 78% yield).

Following **General Procedure A** on 2.0 mmol scale. Purification by column chromatography afforded the title compound (282.0 mg, 69% yield).

$^1\text{H}$  NMR (600 MHz,  $\text{CDCl}_3$ )  $\delta$  7.14 – 7.03 (m, 4H), 3.22 (d,  $J$  = 16.5 Hz, 1H), 2.92 – 2.83 (m, 1H), 2.83 – 2.75 (m, 1H), 2.67 (d,  $J$  = 16.5 Hz, 1H), 2.20 – 2.12 (m, 1H), 1.85 – 1.77 (m, 1H), 1.79 – 1.69 (m, 1H), 1.70 – 1.61 (m, 1H), 0.94 (t,  $J$  = 7.5 Hz, 3H).

$^{13}\text{C}$  NMR (150 MHz,  $\text{CDCl}_3$ )  $\delta$  182.5, 135.5, 134.9, 129.3, 128.8, 126.0, 125.9, 46.0, 36.6, 31.1, 30.1, 26.3, 8.9.

HRMS (ESI-TOF) Calcd for  $\text{C}_{13}\text{H}_{15}\text{O}_2^-$   $[\text{M}-\text{H}]^-$ : 203.1078; found: 203.1072.

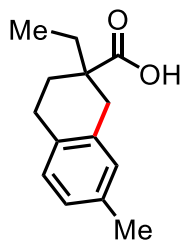

#### 2-Ethyl-7-methyl-1,2,3,4-tetrahydronaphthalene-2-carboxylic acid (2b)

Following **General Procedure A** on 0.1 mmol scale. Purification by pTLC afforded the title compound (colorless oil, 16.5 mg, 76% yield).

$^1\text{H}$  NMR (600 MHz,  $\text{CDCl}_3$ )  $\delta$  7.00 – 6.93 (m, 1H), 6.93 – 6.85 (m, 2H), 3.17 (d,  $J$  = 16.4 Hz, 1H), 2.87 – 2.78 (m, 1H), 2.78 – 2.70 (m, 1H), 2.63 (d,  $J$  = 16.4 Hz, 1H), 2.28 (s, 3H), 2.18 – 2.08 (m, 1H), 1.84 – 1.75 (m, 1H), 1.77 – 1.68 (m, 1H), 1.69 – 1.59 (m, 1H), 0.93 (t,  $J$  = 7.4 Hz, 3H).

$^{13}\text{C}$  NMR (150 MHz,  $\text{CDCl}_3$ ) (major and minor rotamers)  $\delta$  182.8, 135.6, 135.6, 135.5, 134.8, 132.6, 132.0, 130.1, 129.6, 129.4, 128.9, 127.1, 127.0, 46.3, 46.2, 36.8, 36.5, 31.3, 31.3, 30.5, 30.3, 26.4, 26.1, 21.3, 9.1.

HRMS (ESI-TOF) Calcd for  $\text{C}_{14}\text{H}_{17}\text{O}_2^-$   $[\text{M}-\text{H}]^-$ : 217.1234; found: 217.1232.

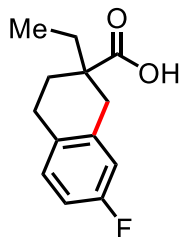

### 2-Ethyl-7-fluoro-1,2,3,4-tetrahydronaphthalene-2-carboxylic acid (2c)

Following **General Procedure A** on 0.1 mmol scale. Purification by pTLC afforded the title compound (colorless oil, 13.0 mg, 59% yield).

$^1\text{H}$  NMR (600 MHz,  $\text{CDCl}_3$ )  $\delta$  7.06 – 6.97 (m, 1H), 6.84 – 6.73 (m, 2H), 3.24 – 3.12 (m, 1H), 2.90 – 2.71 (m, 2H), 2.68 – 2.58 (m, 1H), 2.20 – 2.11 (m, 1H), 1.83 – 1.68 (m, 2H), 1.68 – 1.60 (m, 1H), 0.98 – 0.90 (m, 3H).

$^{13}\text{C}$  NMR (150 MHz,  $\text{CDCl}_3$ ) (major rotamer)  $\delta$  182.2, 161.2 (d,  $J = 243.4$  Hz), 136.9 (d,  $J = 7.2$  Hz), 130.9 (d,  $J = 2.8$  Hz), 130.1 (d,  $J = 8.2$  Hz), 115.0 (d,  $J = 20.4$  Hz), 113.1 (d,  $J = 21.3$  Hz), 45.8, 36.6, 31.3, 30.3, 25.7, 8.9.

$^{13}\text{C}$  NMR (150 MHz,  $\text{CDCl}_3$ ) (minor rotamer)  $\delta$  182.3, 161.2 (d,  $J = 243.4$  Hz), 137.4 (d,  $J = 7.2$  Hz), 130.5 (d,  $J = 7.8$  Hz), 130.4 (d,  $J = 2.9$  Hz), 115.4 (d,  $J = 20.8$  Hz), 115.2 (d,  $J = 21.0$  Hz), 46.1, 36.0, 31.2, 29.8, 26.5, 8.9.

HRMS (ESI-TOF) Calcd for  $\text{C}_{13}\text{H}_{14}\text{FO}_2^-$   $[\text{M}-\text{H}]^-$ : 221.0983; found: 221.0990.

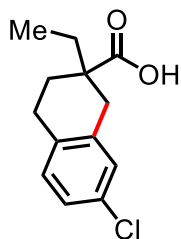

### 7-Chloro-2-ethyl-1,2,3,4-tetrahydronaphthalene-2-carboxylic acid (2d)

Following **General Procedure A** on 0.1 mmol scale. Purification by pTLC afforded the title compound (colorless oil, 13.8 mg, 58% yield).

$^1\text{H}$  NMR (600 MHz,  $\text{CDCl}_3$ )  $\delta$  7.11 – 7.03 (m, 2H), 7.03 – 6.96 (m, 1H), 3.25 – 3.13 (m, 1H), 2.91 – 2.71 (m, 2H), 2.71 – 2.58 (m, 1H), 2.21 – 2.12 (m, 1H), 1.83 – 1.70 (m, 2H), 1.69 – 1.60 (m, 1H), 0.94 (t,  $J = 7.4$  Hz, 3H).

$^{13}\text{C}$  NMR (150 MHz,  $\text{CDCl}_3$ ) (major and minor rotamers)  $\delta$  182.0, 182.0, 137.3, 136.8, 133.9, 133.4, 131.4, 131.4, 130.6, 130.1, 129.0, 128.6, 126.1, 126.1, 46.0, 45.8, 36.4, 36.1, 31.3, 31.3, 30.1, 29.9, 26.3, 25.8, 8.9.

HRMS (ESI-TOF) Calcd for  $C_{13}H_{14}ClO_2^-$   $[M-H]^-$ : 237.0688; found: 237.0684.

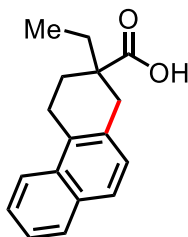

### 2-Ethyl-1,2,3,4-tetrahydrophenanthrene-2-carboxylic acid (2e)

Following **General Procedure A** on 0.1 mmol scale. Purification by pTLC afforded the title compound (colorless oil, 11.5 mg, 45% yield, *ortho/peri* = 10/1).

$^1H$  NMR (600 MHz,  $CDCl_3$ ) (*ortho*-product)  $\delta$  7.92 (d,  $J$  = 8.4 Hz, 1H), 7.78 (d,  $J$  = 8.0 Hz, 1H), 7.62 (d,  $J$  = 8.4 Hz, 1H), 7.49 (t,  $J$  = 7.6 Hz, 1H), 7.42 (t,  $J$  = 7.4 Hz, 1H), 7.20 (d,  $J$  = 8.4 Hz, 1H), 3.36 (d,  $J$  = 16.6 Hz, 1H), 3.25 – 3.13 (m, 2H), 2.84 (d,  $J$  = 16.6 Hz, 1H), 2.39 – 2.29 (m, 1H), 2.01 – 1.92 (m, 1H), 1.83 – 1.75 (m, 1H), 1.76 – 1.67 (m, 1H), 0.98 (t,  $J$  = 7.5 Hz, 3H).

$^{13}C$  NMR (150 MHz,  $CDCl_3$ ) (*ortho*-product)  $\delta$  182.5, 132.3, 132.2, 132.1, 130.1, 128.6, 128.2, 126.3, 126.1, 125.0, 123.0, 45.7, 37.5, 30.9, 29.8, 23.2, 9.0.

HRMS (ESI-TOF) Calcd for  $C_{17}H_{17}O_2^-$   $[M-H]^-$ : 253.1234; found: 253.1230.

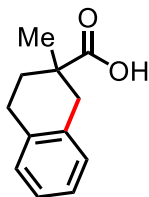

### 2-Methyl-1,2,3,4-tetrahydronaphthalene-2-carboxylic acid (2f)

Following **General Procedure A** on 0.1 mmol scale. Purification by pTLC afforded the title compound (colorless oil, 12.5 mg, 66% yield).

$^1H$  NMR (600 MHz,  $CDCl_3$ )  $\delta$  7.17 – 7.02 (m, 4H), 3.24 (d,  $J$  = 16.4 Hz, 1H), 2.95 – 2.86 (m, 1H), 2.87 – 2.78 (m, 1H), 2.67 (d,  $J$  = 16.4 Hz, 1H), 2.21 – 2.13 (m, 1H), 1.85 – 1.75 (m, 1H), 1.32 (s, 3H).

$^{13}C$  NMR (150 MHz,  $CDCl_3$ )  $\delta$  182.7, 135.1, 134.7, 129.4, 128.9, 126.0, 126.0, 41.6, 38.5, 31.8, 26.2, 24.4.

HRMS (ESI-TOF) Calcd for  $C_{12}H_{13}O_2^-$   $[M-H]^-$ : 189.0921; found: 189.0919.

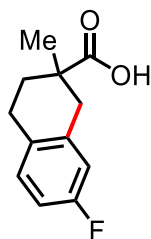

### 7-Fluoro-2-methyl-1,2,3,4-tetrahydronaphthalene-2-carboxylic acid (2g)

Following **General Procedure A** on 0.1 mmol scale. Purification by pTLC afforded the title compound (colorless oil, 11.0 mg, 53% yield).

$^1\text{H}$  NMR (600 MHz,  $\text{CDCl}_3$ )  $\delta$  7.06 – 6.99 (m, 1H), 6.84 – 6.74 (m, 2H), 3.26 – 3.14 (m, 1H), 2.93 – 2.74 (m, 2H), 2.67 – 2.57 (m, 1H), 2.22 – 2.12 (m, 1H), 1.81 – 1.72 (m, 1H), 1.31 (s, 3H).

$^{13}\text{C}$  NMR (150 MHz,  $\text{CDCl}_3$ ) (major rotamer)  $\delta$  183.1, 161.2 (d,  $J = 243.6$  Hz), 136.7 (d,  $J = 7.3$  Hz), 130.5 (d,  $J = 1.8$  Hz), 130.2 (d,  $J = 7.8$  Hz), 115.4 (d,  $J = 20.8$  Hz), 113.2 (d,  $J = 21.1$  Hz), 41.5, 38.5, 31.9, 25.6, 24.5.

$^{13}\text{C}$  NMR (150 MHz,  $\text{CDCl}_3$ ) (minor rotamer)  $\delta$  183.2, 161.2 (d,  $J = 243.6$  Hz), 137.0 (d,  $J = 7.2$  Hz), 130.6 (d,  $J = 6.2$  Hz), 130.2 (d,  $J = 3.1$  Hz), 115.0 (d,  $J = 20.5$  Hz), 113.1 (d,  $J = 21.3$  Hz), 41.7, 37.8, 31.5, 26.5, 24.5.

HRMS (ESI-TOF) Calcd for  $\text{C}_{12}\text{H}_{12}\text{FO}_2^-$  [M-H] $^-$ : 207.0827; found: 207.0825.

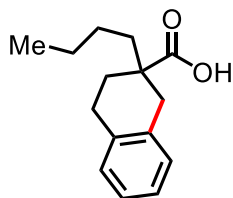

### 2-Butyl-1,2,3,4-tetrahydronaphthalene-2-carboxylic acid (2h)

Following **General Procedure A** on 0.1 mmol scale. Purification by pTLC afforded the title compound (colorless oil, 16.5 mg, 71% yield).

$^1\text{H}$  NMR (600 MHz,  $\text{CDCl}_3$ )  $\delta$  7.13 – 7.03 (m, 4H), 3.22 (d,  $J = 16.4$  Hz, 1H), 2.91 – 2.82 (m, 1H), 2.82 – 2.74 (m, 1H), 2.69 (d,  $J = 16.4$  Hz, 1H), 2.20 – 2.10 (m, 1H), 1.87 – 1.77 (m, 1H), 1.73 – 1.63 (m, 1H), 1.63 – 1.55 (m, 1H), 1.35 – 1.23 (m, 4H), 0.89 (t,  $J = 6.8$  Hz, 3H).

$^{13}\text{C}$  NMR (150 MHz,  $\text{CDCl}_3$ )  $\delta$  181.4, 135.3, 134.7, 129.1, 128.6, 125.7, 125.7, 45.3, 37.9, 37.0, 30.2, 26.5, 26.1, 23.0, 13.9.

HRMS (ESI-TOF) Calcd for  $\text{C}_{15}\text{H}_{19}\text{O}_2^-$  [M-H] $^-$ : 231.1391; found: 231.1390.

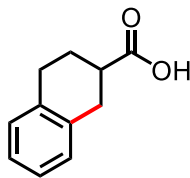

### 1,2,3,4-Tetrahydronaphthalene-2-carboxylic acid (2i)

Following **General Procedure A** on 0.1 mmol scale. Purification by pTLC afforded the title compound (colorless oil, 11.0 mg, 63% yield).

$^1\text{H}$  NMR (600 MHz,  $\text{CDCl}_3$ )  $\delta$  7.18 – 7.05 (m, 4H), 3.10 – 2.98 (m, 2H), 2.95 – 2.84 (m, 2H), 2.84 – 2.77 (m, 1H), 2.29 – 2.22 (m, 1H), 1.95 – 1.85 (m, 1H).

$^{13}\text{C}$  NMR (150 MHz,  $\text{CDCl}_3$ )  $\delta$  181.7, 135.7, 134.7, 129.2, 129.0, 126.2, 126.0, 39.9, 31.5, 28.5, 25.8.

HRMS (ESI-TOF) Calcd for  $\text{C}_{11}\text{H}_{11}\text{O}_2^-$   $[\text{M-H}]^-$ : 175.0765; found: 175.0757.

The NMR data matches the reported data<sup>11</sup>.

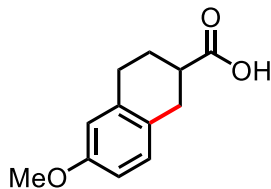

### 6-Methoxy-1,2,3,4-tetrahydronaphthalene-2-carboxylic acid (2j)

Following **General Procedure A** on 0.1 mmol scale. Purification by pTLC afforded the title compound (colorless oil, 10.2 mg, 50% yield).

$^1\text{H}$  NMR (600 MHz,  $\text{CDCl}_3$ )  $\delta$  7.02 (d,  $J$  = 8.4 Hz, 1H), 6.71 (dd,  $J$  = 8.4, 2.4 Hz, 1H), 6.63 (s, 1H), 3.77 (s, 3H), 3.04 – 2.91 (m, 2H), 2.91 – 2.81 (m, 2H), 2.81 – 2.73 (m, 1H), 2.27 – 2.18 (m, 1H), 1.93 – 1.82 (m, 1H).

$^{13}\text{C}$  NMR (150 MHz,  $\text{CDCl}_3$ )  $\delta$  181.2, 157.9, 136.8, 130.1, 126.8, 113.6, 112.4, 55.4, 40.1, 30.7, 28.8, 25.7.

HRMS (ESI-TOF) Calcd for  $\text{C}_{12}\text{H}_{13}\text{O}_3^-$   $[\text{M-H}]^-$ : 205.0870; found: 205.0869.

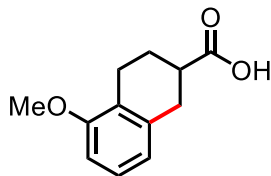

### 5-Methoxy-1,2,3,4-tetrahydronaphthalene-2-carboxylic acid (2k)

Following **General Procedure A** on 0.1 mmol scale. Purification by pTLC afforded the title compound (colorless oil, 7.3 mg, 35% yield).

$^1\text{H}$  NMR (600 MHz,  $\text{CDCl}_3$ )  $\delta$  7.10 (t,  $J = 7.9$  Hz, 1H), 6.72 (d,  $J = 7.7$  Hz, 1H), 6.67 (d,  $J = 8.1$  Hz, 1H), 3.82 (s, 3H), 3.18 – 3.08 (m, 1H), 2.93 – 2.80 (m, 2H), 2.79 – 2.70 (m, 2H), 2.25 – 2.18 (m, 1H), 1.92 – 1.78 (m, 1H).

$^{13}\text{C}$  NMR (150 MHz,  $\text{CDCl}_3$ )  $\delta$  179.1, 157.5, 137.1, 126.4, 123.7, 121.1, 107.2, 55.4, 39.4, 28.7, 25.6, 25.4.

HRMS (ESI-TOF) Calcd for  $\text{C}_{12}\text{H}_{13}\text{O}_3^-$   $[\text{M}-\text{H}]^-$ : 205.0870; found: 205.0869.

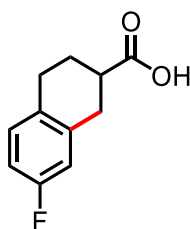

### 7-Fluoro-1,2,3,4-tetrahydronaphthalene-2-carboxylic acid (2l)

Following **General Procedure A** on 0.1 mmol scale. Purification by pTLC afforded the title compound (colorless oil, 10.1 mg, 52% yield).

$^1\text{H}$  NMR (600 MHz,  $\text{CDCl}_3$ )  $\delta$  7.12 – 6.99 (m, 1H), 6.90 – 6.75 (m, 2H), 3.09 – 2.93 (m, 2H), 2.93 – 2.75 (m, 3H), 2.29 – 2.19 (m, 1H), 1.96 – 1.84 (m, 1H).

$^{13}\text{C}$  NMR (150 MHz,  $\text{CDCl}_3$ ) (major rotamer)  $\delta$  180.7, 161.2 (d,  $J = 243.7$  Hz), 136.6 (d,  $J = 7.4$  Hz), 131.2 (d,  $J = 2.7$  Hz), 130.3 (d,  $J = 8.2$  Hz), 115.3 (d,  $J = 20.6$  Hz), 113.3 (d,  $J = 21.4$  Hz), 39.5, 31.4, 27.8, 25.8.

$^{13}\text{C}$  NMR (150 MHz,  $\text{CDCl}_3$ ) (minor rotamer)  $\delta$  180.8, 161.3 (d,  $J = 244.2$  Hz), 137.6 (d,  $J = 7.3$  Hz), 130.5 (d,  $J = 7.8$  Hz), 130.2 (d,  $J = 2.8$  Hz), 115.1 (d,  $J = 20.7$  Hz), 113.2 (d,  $J = 21.1$  Hz), 39.7, 30.8, 28.6, 25.4.

HRMS (ESI-TOF) Calcd for  $\text{C}_{11}\text{H}_{10}\text{FO}_2^-$   $[\text{M}-\text{H}]^-$ : 193.0670; found: 193.0666.

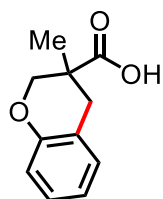

### 3-Methylchromane-3-carboxylic acid (2m)

Following **General Procedure A** on 0.1 mmol scale. Purification by pTLC afforded the title compound (colorless oil, 13.0 mg, 68% yield).

$^1\text{H}$  NMR (600 MHz,  $\text{CDCl}_3$ )  $\delta$  7.15 – 7.08 (m, 1H), 7.06 (d,  $J$  = 7.4 Hz, 1H), 6.91 – 6.85 (m, 1H), 6.83 (d,  $J$  = 8.2 Hz, 1H), 4.31 (dd,  $J$  = 10.8, 1.4 Hz, 1H), 3.95 (d,  $J$  = 10.8 Hz, 1H), 3.27 (d,  $J$  = 16.4 Hz, 1H), 2.70 (d,  $J$  = 16.4 Hz, 1H), 1.34 (s, 3H).

$^{13}\text{C}$  NMR (150 MHz,  $\text{CDCl}_3$ )  $\delta$  180.7, 153.5, 130.0, 127.7, 121.1, 120.1, 116.8, 71.0, 40.8, 34.5, 21.1.

HRMS (ESI-TOF) Calcd for  $\text{C}_{11}\text{H}_{11}\text{O}_3^-$   $[\text{M}-\text{H}]^-$ : 191.0714; found: 191.0713.

The NMR data matches the reported data<sup>12</sup>.

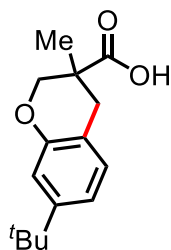

#### 7-(*tert*-Butyl)-3-methylchromane-3-carboxylic acid (**2n**)

Following **General Procedure A** on 0.1 mmol scale. Purification by pTLC afforded the title compound (colorless oil, 20.0 mg, 80% yield, **2n/2n'** = 3/1).

$^1\text{H}$  NMR (600 MHz,  $\text{CDCl}_3$ )  $\delta$  6.99 (d,  $J$  = 8.0 Hz, 1H), 6.92 (dd,  $J$  = 8.0, 2.0 Hz, 1H), 6.86 (d,  $J$  = 2.0 Hz, 1H), 4.29 (dd,  $J$  = 10.8, 1.4 Hz, 1H), 3.93 (dd,  $J$  = 10.8, 1.4 Hz, 1H), 3.24 (d,  $J$  = 16.3 Hz, 1H), 2.66 (d,  $J$  = 16.3 Hz, 1H), 1.34 (s, 3H), 1.28 (s, 9H).

$^{13}\text{C}$  NMR (150 MHz,  $\text{CDCl}_3$ )  $\delta$  180.8, 153.0, 151.2, 129.4, 118.4, 117.0, 113.7, 71.0, 40.9, 34.6, 34.1, 31.4, 21.2.

HRMS (ESI-TOF) Calcd for  $\text{C}_{15}\text{H}_{19}\text{O}_3^-$   $[\text{M}-\text{H}]^-$ : 247.1340; found: 247.1339.

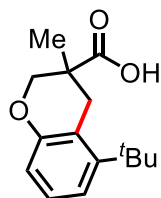

#### 5-(*tert*-Butyl)-3-methylchromane-3-carboxylic acid (**2n'**)

$^1\text{H}$  NMR (600 MHz,  $\text{CDCl}_3$ )  $\delta$  7.05 (t,  $J$  = 7.8 Hz, 1H), 6.99 (d,  $J$  = 7.8 Hz, 1H), 6.73 (d,  $J$  = 7.8 Hz, 1H), 4.37 (d,  $J$  = 10.5 Hz, 1H), 3.91 (d,  $J$  = 10.5 Hz, 1H), 3.51 (d,  $J$  = 16.0 Hz, 1H), 2.90 (d,  $J$  = 16.0 Hz, 1H), 1.42 (s, 9H), 1.35 (s, 3H).

$^{13}\text{C}$  NMR (150 MHz,  $\text{CDCl}_3$ )  $\delta$  180.9, 154.0, 149.4, 127.1, 119.0, 118.9, 115.6, 70.4, 40.8, 36.2, 34.9, 31.2, 21.5.

HRMS (ESI-TOF) Calcd for  $C_{15}H_{19}O_3^-$   $[M-H]^-$ : 247.1340; found: 247.1337.

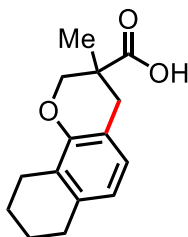

### 3-Methyl-3,4,7,8,9,10-hexahydro-2H-benzo[h]chromene-3-carboxylic acid (2o)

Following **General Procedure A** on 0.1 mmol scale. Purification by pTLC afforded the title compound (colorless oil, 21.0 mg, 85% yield).

$^1H$  NMR (600 MHz,  $CDCl_3$ )  $\delta$  6.81 (d,  $J = 7.8$  Hz, 1H), 6.63 (d,  $J = 7.8$  Hz, 1H), 4.29 (d,  $J = 10.8$  Hz, 1H), 3.96 (d,  $J = 10.8$  Hz, 1H), 3.23 (d,  $J = 16.3$  Hz, 1H), 2.70 (t,  $J = 5.8$  Hz, 2H), 2.65 (d,  $J = 16.3$  Hz, 1H), 2.64 – 2.58 (m, 2H), 1.80 – 1.69 (m, 4H), 1.33 (s, 3H).

$^{13}C$  NMR (150 MHz,  $CDCl_3$ )  $\delta$  181.2, 151.1, 136.7, 126.5, 125.4, 121.6, 116.2, 70.9, 40.7, 34.5, 29.6, 23.1, 23.0, 22.9, 21.1.

HRMS (ESI-TOF) Calcd for  $C_{15}H_{17}O_3^-$   $[M-H]^-$ : 245.1183; found: 245.1183.

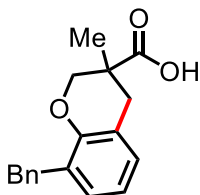

### 8-Benzyl-3-methylchromane-3-carboxylic acid (2p)

Following **General Procedure A** on 0.1 mmol scale. Purification by pTLC afforded the title compound (colorless oil, 20.0 mg, 70% yield).

$^1H$  NMR (600 MHz,  $CDCl_3$ )  $\delta$  7.27 – 7.20 (m, 2H), 7.19 (d,  $J = 7.5$  Hz, 2H), 7.15 (t,  $J = 7.3$  Hz, 1H), 6.94 (d,  $J = 7.5$  Hz, 1H), 6.89 (d,  $J = 7.4$  Hz, 1H), 6.80 (t,  $J = 7.5$  Hz, 1H), 4.31 (d,  $J = 10.7$  Hz, 1H), 4.03 – 3.88 (m, 3H), 3.28 (d,  $J = 16.4$  Hz, 1H), 2.71 (d,  $J = 16.4$  Hz, 1H), 1.34 (s, 3H).

$^{13}C$  NMR (150 MHz,  $CDCl_3$ )  $\delta$  180.5, 151.2, 141.1, 129.1, 129.0, 128.5, 128.4, 128.1, 125.9, 120.7, 119.9, 71.0, 40.7, 35.7, 34.7, 21.0.

HRMS (ESI-TOF) Calcd for  $C_{18}H_{17}O_3^-$   $[M-H]^-$ : 281.1183; found: 281.1184.

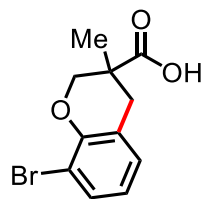

### 8-Bromo-3-methylchromane-3-carboxylic acid (2q)

Following **General Procedure A** on 0.1 mmol scale. Purification by pTLC afforded the title compound (colorless oil, 8.5 mg, 31% yield).

$^1\text{H}$  NMR (600 MHz,  $\text{CDCl}_3$ )  $\delta$  7.36 (d,  $J = 7.8$  Hz, 1H), 7.02 (d,  $J = 7.8$  Hz, 1H), 6.76 (t,  $J = 7.8$  Hz, 1H), 4.41 (d,  $J = 10.8$  Hz, 1H), 4.07 (d,  $J = 10.8$  Hz, 1H), 3.29 (d,  $J = 16.4$  Hz, 1H), 2.72 (d,  $J = 16.4$  Hz, 1H), 1.36 (s, 3H).

$^{13}\text{C}$  NMR (150 MHz,  $\text{CDCl}_3$ )  $\delta$  179.8, 150.1, 131.5, 129.2, 121.9, 110.9, 71.7, 40.7, 34.6, 21.0 (1 carbon signal was not assigned due to overlaps).

HRMS (ESI-TOF) Calcd for  $\text{C}_{11}\text{H}_{10}\text{BrO}_3^-$   $[\text{M}-\text{H}]^-$ : 268.9819; found: 268.9820.

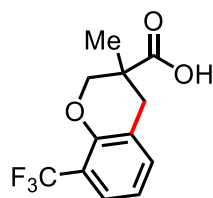

### 3-Methyl-8-(trifluoromethyl)chromane-3-carboxylic acid (2r)

Following **General Procedure A** on 0.1 mmol scale. Purification by pTLC afforded the title compound (colorless oil, 4.5 mg, 17% yield).

$^1\text{H}$  NMR (600 MHz,  $\text{CDCl}_3$ )  $\delta$  7.40 (d,  $J = 7.8$  Hz, 1H), 7.24 (d,  $J = 7.8$  Hz, 1H), 6.93 (t,  $J = 7.8$  Hz, 1H), 4.41 (d,  $J = 10.9$  Hz, 1H), 4.08 (d,  $J = 10.9$  Hz, 1H), 3.31 (d,  $J = 16.4$  Hz, 1H), 2.75 (d,  $J = 16.4$  Hz, 1H), 1.38 (s, 3H).

$^{13}\text{C}$  NMR (150 MHz,  $\text{CDCl}_3$ )  $\delta$  179.5, 151.6, 133.8, 125.4 (q,  $J = 5.4$  Hz), 123.7 (q,  $J = 272.3$  Hz), 121.6, 120.2, 118.2 (q,  $J = 30.9$  Hz), 71.2, 40.3, 34.3, 21.0.

HRMS (ESI-TOF) Calcd for  $\text{C}_{12}\text{H}_{10}\text{F}_3\text{O}_3^-$   $[\text{M}-\text{H}]^-$ : 259.0588; found: 259.0587.

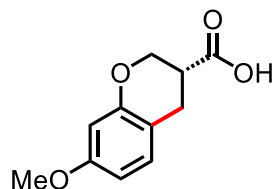

### (R)-7-Methoxychromane-3-carboxylic acid (2s)

Following **General Procedure A** on 0.1 mmol scale. Purification by pTLC afforded the title compound (colorless oil, 15.0 mg, 72% yield).

$^1\text{H}$  NMR (600 MHz,  $\text{CDCl}_3$ )  $\delta$  6.98 (d,  $J = 8.4$  Hz, 1H), 6.49 (dd,  $J = 8.4, 2.6$  Hz, 1H), 6.39 (d,  $J = 2.6$  Hz, 1H), 4.47 – 4.40 (m, 1H), 4.21 – 4.14 (m, 1H), 3.75 (s, 3H), 3.10 – 3.04 (m, 1H), 3.03 – 2.96 (m, 2H).

$^{13}\text{C}$  NMR (150 MHz,  $\text{CDCl}_3$ )  $\delta$  176.8, 159.4, 154.8, 130.3, 112.1, 108.1, 101.7, 66.3, 55.5, 38.4, 26.8.

HRMS (ESI-TOF) Calcd for  $\text{C}_{11}\text{H}_{11}\text{O}_4^-$   $[\text{M}-\text{H}]^-$ : 207.0663; found: 207.0660.

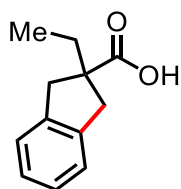

### 2-Ethyl-2,3-dihydro-1H-indene-2-carboxylic acid (2u)

Following **General Procedure A** on 0.1 mmol scale. Purification by pTLC afforded the title compound (colorless oil, 10.0 mg, 53% yield).

$^1\text{H}$  NMR (600 MHz,  $\text{CDCl}_3$ )  $\delta$  7.21 – 7.16 (m, 2H), 7.16 – 7.11 (m, 2H), 3.48 (d,  $J = 16.2$  Hz, 2H), 2.92 (d,  $J = 16.2$  Hz, 2H), 1.83 (q,  $J = 7.2$  Hz, 2H), 0.94 (t,  $J = 7.2$  Hz, 3H).

$^{13}\text{C}$  NMR (150 MHz,  $\text{CDCl}_3$ )  $\delta$  182.3, 141.4, 126.7, 124.6, 54.7, 41.8, 31.5, 10.0.

HRMS (ESI-TOF) Calcd for  $\text{C}_{12}\text{H}_{13}\text{O}_2^-$   $[\text{M}-\text{H}]^-$ : 189.0921; found: 189.0918.

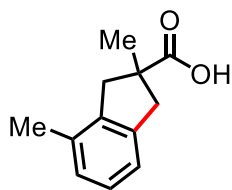

### 2,4-Dimethyl-2,3-dihydro-1H-indene-2-carboxylic acid (2v)

Following **General Procedure B** on 0.1 mmol scale. Purification by pTLC afforded the title compound (colorless oil, 11.5 mg, 61% yield).

$^1\text{H}$  NMR (600 MHz,  $\text{CDCl}_3$ )  $\delta$  7.08 (t,  $J = 7.4$  Hz, 1H), 7.03 (d,  $J = 7.4$  Hz, 1H), 6.98 (d,  $J = 7.4$  Hz, 1H), 3.53 (d,  $J = 15.9$  Hz, 1H), 3.43 (d,  $J = 16.0$  Hz, 1H), 2.86 (d,  $J = 15.9$  Hz, 1H), 2.80 (d,  $J = 16.0$  Hz, 1H), 2.24 (s, 3H), 1.41 (s, 3H).

$^{13}\text{C}$  NMR (150 MHz,  $\text{CDCl}_3$ )  $\delta$  184.2, 141.0, 140.0, 134.2, 127.6, 127.0, 122.1, 49.0, 44.2, 42.8, 25.4, 19.2.

HRMS (ESI-TOF) Calcd for  $\text{C}_{12}\text{H}_{13}\text{O}_2^-$   $[\text{M}-\text{H}]^-$ : 189.0921; found: 189.0915.

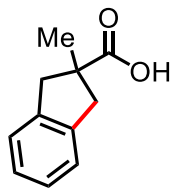

**2-Methyl-2,3-dihydro-1*H*-indene-2-carboxylic acid (2w)**

Following **General Procedure B** on 0.1 mmol scale. Purification by pTLC afforded the title compound (colorless oil, 8.0 mg, 48% yield).

$^1\text{H}$  NMR (600 MHz,  $\text{CDCl}_3$ )  $\delta$  7.23 – 7.18 (m, 2H), 7.18 – 7.14 (m, 2H), 3.52 (d,  $J = 15.8$  Hz, 2H), 2.85 (d,  $J = 15.8$  Hz, 2H), 1.41 (s, 3H).

$^{13}\text{C}$  NMR (150 MHz,  $\text{CDCl}_3$ )  $\delta$  182.5, 141.2, 126.8, 124.8, 49.5, 44.0, 25.0.

HRMS (ESI-TOF) Calcd for  $\text{C}_{11}\text{H}_{11}\text{O}_2^-$   $[\text{M-H}]^-$ : 175.0765; found: 175.0762.

The NMR data matches the reported data<sup>13</sup>.

### Total synthesis of (±)-russujaponol F

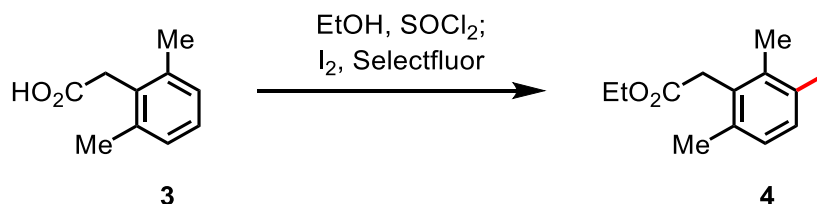

To the EtOH (5.0 mL) solution of **3** (1.0 mmol, 164 mg) was added SOCl<sub>2</sub> (2.0 equiv, 0.15 mL) at 0 °C and then the mixture was stirred under reflux overnight. After being allowed to cool to room temperature, the mixture was concentrated *in vacuo* to afford the corresponding ethyl ester. Following literature procedure<sup>10</sup> with slight modification, to the CH<sub>3</sub>CN solution (10.0 mL) of the ethyl ester was added I<sub>2</sub> (0.5 equiv, 127 mg) and Selectfluor (0.5 equiv, 177 mg) and the mixture was stirred at 60 °C for 3 h. After being allowed to cool to room temperature, the mixture was diluted with EA, washed with saturated Na<sub>2</sub>S<sub>2</sub>O<sub>3</sub>, and concentrated *in vacuo*. The crude mixture was purified by column chromatography to afford the iodination product **4** (250 mg, 79% yield).

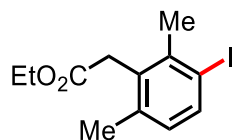

#### Ethyl 2-(3-iodo-2,6-dimethylphenyl)acetate (**4**)

<sup>1</sup>H NMR (600 MHz, CDCl<sub>3</sub>) δ 7.65 (d, *J* = 8.1 Hz, 1H), 6.74 (d, *J* = 8.1 Hz, 1H), 4.15 (q, *J* = 7.1 Hz, 2H), 3.75 (s, 2H), 2.48 (s, 3H), 2.29 (s, 3H), 1.25 (t, *J* = 7.1 Hz, 3H).

<sup>13</sup>C NMR (150 MHz, CDCl<sub>3</sub>) δ 171.0, 139.9, 138.1, 137.8, 133.0, 129.8, 99.7, 61.1, 37.1, 26.0, 20.5, 14.3.

HRMS (ESI-TOF) Calcd for C<sub>12</sub>H<sub>16</sub>IO<sub>2</sub><sup>+</sup> [M+H]<sup>+</sup>: 319.0189; found: 319.0196.

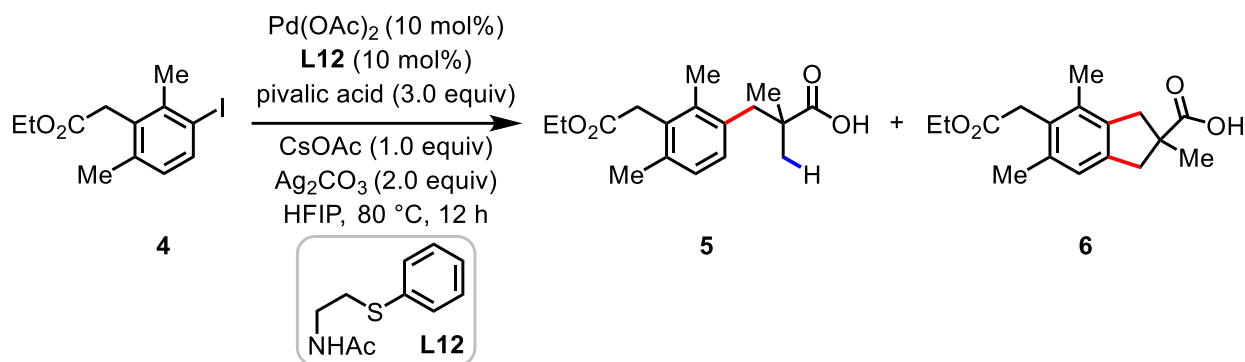

In the culture tube,  $\text{Pd}(\text{OAc})_2$  (10 mol%, 2.2 mg), ligand **L12** (10 mol%, 2.0 mg),  $\text{CsOAc}$  (1.0 equiv, 19.2 mg),  $\text{Ag}_2\text{CO}_3$  (2.0 equiv, 55.1 mg), pivalic acid (3.0 equiv, 30.6 mg) and **4** (0.1 mmol, 31.8 mg) in order were weighed in air and placed with a magnetic stir bar. Then HFIP (1.0 mL) was added. The reaction mixture was stirred at rt for 3 min, and then heated to 80 °C for 12 h (600 rpm). After being allowed to cool to room temperature, the mixture was treated with  $\text{HCO}_2\text{H}$  (0.1 mL), diluted with DCM, filtered through a Celite plug, and concentrated *in vacuo*. The crude mixture was purified by pTLC (hexane/EA) to afford the arylation product **5** (18.0 mg, 62% yield) and the product **6** (3.5 mg, 12% yield).

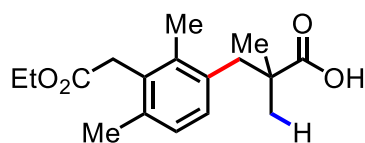

### 3-(3-(2-Ethoxy-2-oxoethyl)-2,4-dimethylphenyl)-2,2-dimethylpropanoic acid (**5**)

$^1\text{H}$  NMR (600 MHz,  $\text{CDCl}_3$ )  $\delta$  6.99 (d,  $J = 7.9$  Hz, 1H), 6.96 (d,  $J = 7.9$  Hz, 1H), 4.14 (q,  $J = 7.1$  Hz, 2H), 3.70 (s, 2H), 2.99 (s, 2H), 2.30 (s, 3H), 2.26 (s, 3H), 1.23 (t,  $J = 7.1$  Hz, 3H), 1.19 (s, 6H).

$^{13}\text{C}$  NMR (150 MHz,  $\text{CDCl}_3$ )  $\delta$  183.1, 171.6, 136.5, 135.7, 134.0, 132.5, 130.1, 127.5, 60.9, 44.1, 42.3, 36.2, 27.3, 24.7, 20.7, 17.0, 14.4.

HRMS (ESI-TOF) Calcd for  $\text{C}_{17}\text{H}_{23}\text{O}_4^-$   $[\text{M}-\text{H}]^-$ : 291.1602; found: 291.1605.

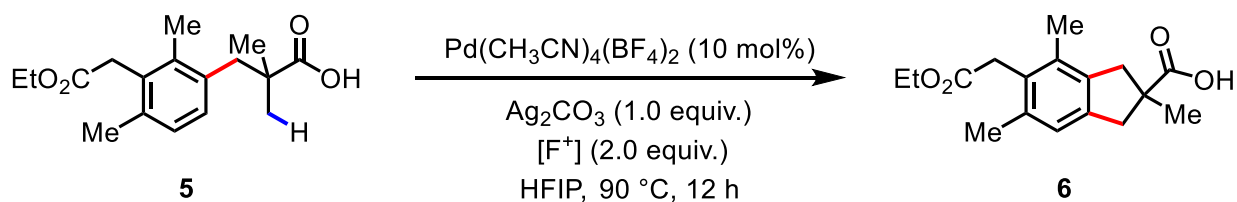

In the culture tube,  $\text{Pd}(\text{CH}_3\text{CN})_4(\text{BF}_4)_2$  (10 mol%, 2.2 mg),  $\text{Ag}_2\text{CO}_3$  (1.0 equiv, 13.8 mg), 1-fluoro-2,4,6-trimethylpyridinium tetrafluoroborate (2.0 equiv, 22.7 mg), and **5** (0.05 mmol, 14.6 mg) in order were weighed in air and placed with a magnetic stir bar. Then HFIP (0.5 mL) was added. The reaction mixture was stirred at rt for 3 min, and then heated to 90 °C for 12 h (600 rpm). After being allowed to cool to room temperature, the mixture was treated with  $\text{HCO}_2\text{H}$  (0.05 mL), diluted with DCM, filtered through a Celite plug, and concentrated *in vacuo*. The crude mixture was purified by pTLC (hexane/EA) to afford the product **6** (6.0 mg, 41% yield).

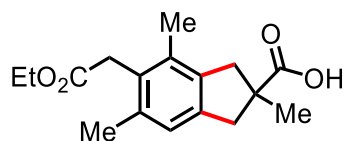

**5-(2-Ethoxy-2-oxoethyl)-2,4,6-trimethyl-2,3-dihydro-1H-indene-2-carboxylic acid (6)**

$^1\text{H}$  NMR (600 MHz,  $\text{CDCl}_3$ )  $\delta$  6.90 (s, 1H), 4.14 (q,  $J = 7.0$  Hz, 2H), 3.66 (s, 2H), 3.49 (d,  $J = 16.0$  Hz, 1H), 3.44 (d,  $J = 16.0$  Hz, 1H), 2.81 (d,  $J = 16.0$  Hz, 1H), 2.80 (d,  $J = 16.0$  Hz, 1H), 2.30 (s, 3H), 2.21 (s, 3H), 1.41 (s, 3H), 1.25 (t,  $J = 7.1$  Hz, 3H).

$^{13}\text{C}$  NMR (150 MHz,  $\text{CDCl}_3$ )  $\delta$  181.9, 171.7, 139.7, 138.3, 136.0, 133.3, 130.0, 124.1, 60.9, 48.8, 44.2, 43.5, 35.4, 25.5, 20.8, 16.5, 14.4.

HRMS (ESI-TOF) Calcd for  $\text{C}_{17}\text{H}_{21}\text{O}_4^-$   $[\text{M}-\text{H}]^-$ : 289.1445; found: 289.1447.

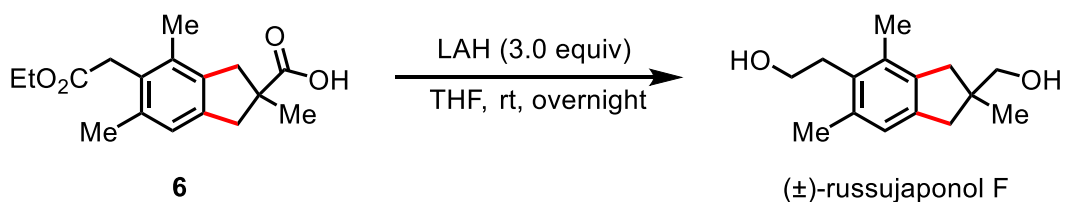

In the culture tube, to the THF (1.0 mL) solution of **6** (0.02 mmol, 6.0 mg) was added LAH (3.0 equiv, 1.0 M in THF, 0.06 mL) at 0 °C. The reaction mixture was warmed to rt and stirred at rt overnight. The mixture was diluted with ether, washed with saturated NH<sub>4</sub>Cl, and concentrated *in vacuo*. The crude mixture was purified by pTLC (hexane/EA) to afford the (±)-russujaponol F (4.5 mg, 96% yield). The NMR data matches the reported data<sup>14,15</sup>.

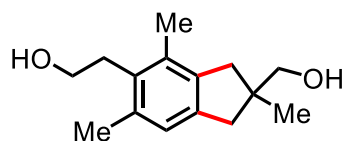

**(±)-Russujaponol F**

<sup>1</sup>H NMR (600 MHz, CDCl<sub>3</sub>) δ 6.87 (s, 1H), 3.74 (t, *J* = 7.4 Hz, 2H), 3.52 (s, 2H), 2.95 (t, *J* = 7.5 Hz, 2H), δ 2.88 (d, *J* = 15.9 Hz, 1H), 2.84 (d, *J* = 15.9 Hz, 1H), 2.63 (d, *J* = 15.9 Hz, 1H), 2.59 (d, *J* = 15.9 Hz, 1H), 2.32 (s, 3H), 2.22 (s, 3H), 1.18 (s, 3H).

<sup>13</sup>C NMR (150 MHz, CDCl<sub>3</sub>) δ 140.3, 139.8, 135.4, 133.2, 132.3, 124.4, 71.1, 62.1, 44.3, 43.1, 42.4, 32.9, 24.6, 20.6, 16.3.

HRMS (ESI-TOF) Calcd for C<sub>15</sub>H<sub>21</sub>O<sub>2</sub><sup>-</sup> [M-H]<sup>-</sup>: 233.1547; found: 233.1544.

## KIE experiments

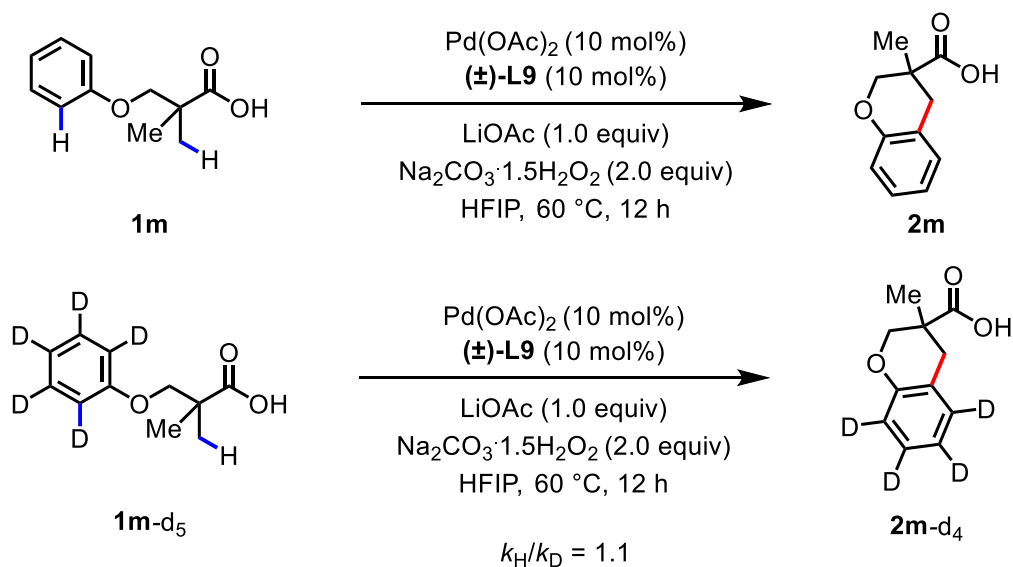

Following **General Procedure A** on 0.05 mmol scale. After being heated to 60 °C for the appropriate time, the mixture was diluted with DCM, treated with  $\text{HCO}_2\text{H}$  (0.1 mL), and concentrated *in vacuo*. The yield was determined by  $^1\text{H}$  NMR analysis of the crude product using  $\text{CH}_2\text{Br}_2$  as the internal standard. The obtained yields were plotted as concentration vs. time (Figure S1 and S2). Representative initial data are shown below:

| entry | t(min) | <b>2m</b> ( $10^{-3}$ M) | <b>2m-d<sub>4</sub></b> ( $10^{-3}$ M) |
|-------|--------|--------------------------|----------------------------------------|
| 1     | 0      | 0.0                      | 0.0                                    |
| 2     | 20     | 22.5                     | 19.3                                   |
| 3     | 40     | 107.7                    | 116.2                                  |
| 4     | 60     | 161.0                    | 141.3                                  |
| 5     | 80     | 250.2                    | 241.4                                  |

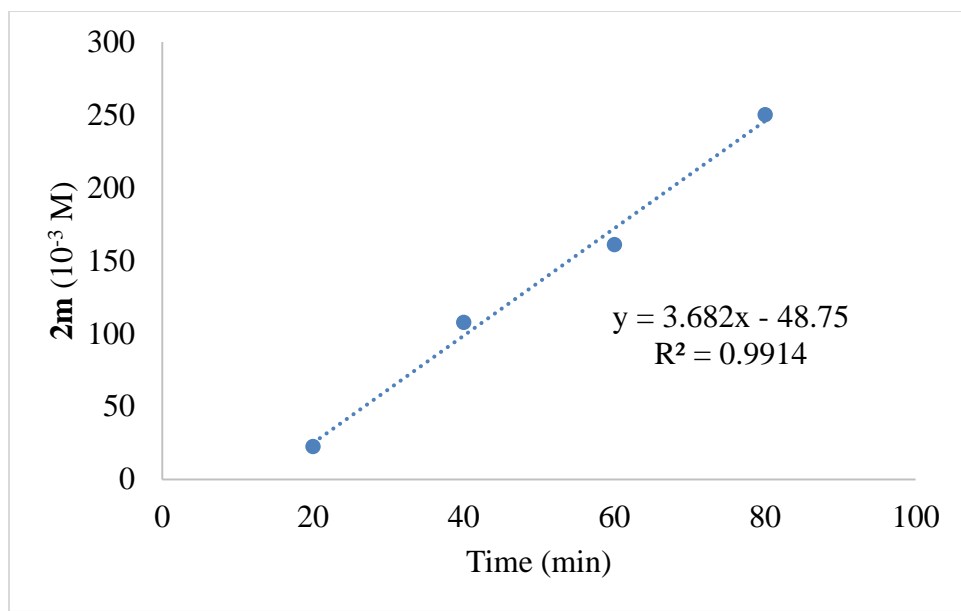

**Figure S1.** Representative initial data of **2m**

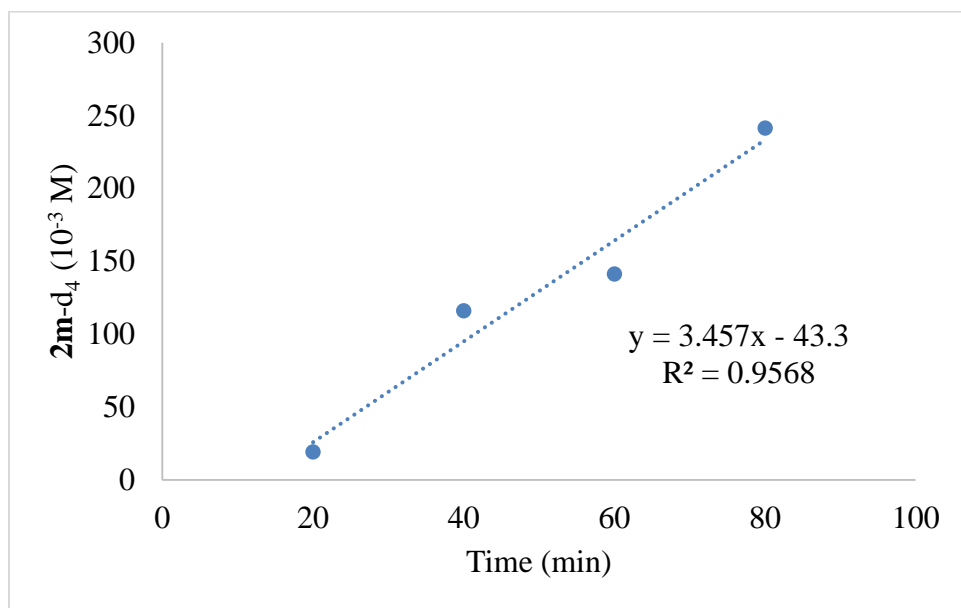

**Figure S2.** Representative initial data of **2m-d<sub>4</sub>**

## Reference:

1. Park, H.; Chekshin, N.; Shen, P.-X.; Yu, J.-Q. Ligand-enabled, palladium-catalyzed  $\beta$ -C(sp<sup>3</sup>)-H arylation of weinreb amides. *ACS Catal.* **2018**, 8, 9292–9297.
2. Shen, P.-X.; Hu, L.; Shao, Q.; Hong, K.; Yu, J.-Q. Pd(II)-catalyzed enantioselective C(sp<sup>3</sup>)-H arylation of free carboxylic acids. *J. Am. Chem. Soc.* **2018**, 140, 6545–6549.
3. Fillion, E.; Dumas, A. M. Synthesis of fused 4,5-disubstituted indole ring systems by intramolecular Friedel–Crafts acylation of 4-substituted indoles. *J. Org. Chem.* **2008**, 73, 2920–2923.
4. Franchini, C.; Carocci, A.; Catalano, A.; Cavalluzzi, M. M.; Corbo, F.; Lentini, G.; Scilimati, A.; Tortorella, P.; Camerino, D. C.; De Luca, A. J. Optically active mexiletine analogues as stereoselective blockers of voltage-gated Na<sup>+</sup> channels. *J. Med. Chem.* **2003**, 46, 5238–5248.
5. Ikeda, K.; Achiwa, K.; Sekiya, M. Trifluoromethanesulfonic acid-promoted reaction of hexahydro-1,3,5-triazines. Introduction of a secondary aminomethyl grouping into carboxylates at the  $\alpha$ -position through ketene silyl acetals. *Chem. Pharm. Bull.* **1986**, 34, 1579–1583.
6. Hong, K.; Park, H.; Yu, J.-Q. Methylene C(sp<sup>3</sup>)-H arylation of aliphatic ketones using a transient directing group. *ACS Catal.* **2017**, 7, 6938–6941.
7. Naturale, G.; Lamblin, M.; Commandeur, C.; Felpin, F.-X.; Dessolin, J. Direct C–H alkylation of naphthoquinones with amino acids through a revisited Kochi–Anderson radical decarboxylation: trends in reactivity and applications. *Eur. J. Org. Chem.* **2012**, 5774–5788.
8. Dener, J. M.; Fantauzzi, P. P.; Kshirsagar, T. A.; Kelly, D. E.; Wolfe, A. B. Large-scale syntheses of Fmoc-protected non-proteogenic amino acids: useful building blocks for combinatorial libraries. *Org. Process Res. Dev.* **2001**, 54, 445–449.
9. F. Fülöp, M. Palkó, J. Kámán, L. Lázár, R. Sillanpää, Synthesis of all four enantiomers of 1-aminoindane-2-carboxylic acid, a new cispentacin benzologue. *Tetrahedron: Asymmetry* **2000**, 11, 4179–4187.
10. Stavber, S.; Kralj, P.; Zupan, M. Selective and effective iodination of alkyl-substituted benzenes with elemental iodine activated by Selectfluor<sup>TM</sup> F-TEDA-BF<sub>4</sub>. *Synlett* **2002**, 598–600.

11. Seo, H.; Liu, A.; Jamison, T. F. Direct  $\beta$ -selective hydrocarboxylation of styrenes with CO<sub>2</sub> enabled by continuous flow photoredox catalysis. *J. Am. Chem. Soc.* **2017**, *139*, 13969–13972.
12. Feng, Y. et al. Benzopyrans and analogs as Rho kinase inhibitors and their preparation and use in the treatment of Rho kinase-mediated diseases. PCT Int. Appl., 2009079008, 25 Jun 2009.
13. Alkayal, A.; Tabas, V.; Montanaro, S.; Wright, I. A.; Malkov, A. V.; Buckley, B. R. Harnessing applied potential: selective  $\beta$ -hydrocarboxylation of substituted olefins. *J. Am. Chem. Soc.* **2020**, *142*, 1780–1785.
14. Melot, R.; Craveiro, M.; Bürgi, T.; Baudoin, O. Divergent enantioselective synthesis of (nor)illudalane sesquiterpenes via Pd<sup>0</sup>-catalyzed asymmetric C(sp<sup>3</sup>)–H activation. *Org. Lett.* **2019**, *21*, 812–815.
15. Melot, R.; Craveiro, M. V.; Baudoin, O. Total synthesis of (nor)illudalane sesquiterpenes based on a C(sp<sup>3</sup>)–H activation strategy. *J. Org. Chem.* **2019**, *84*, 12933–12945.

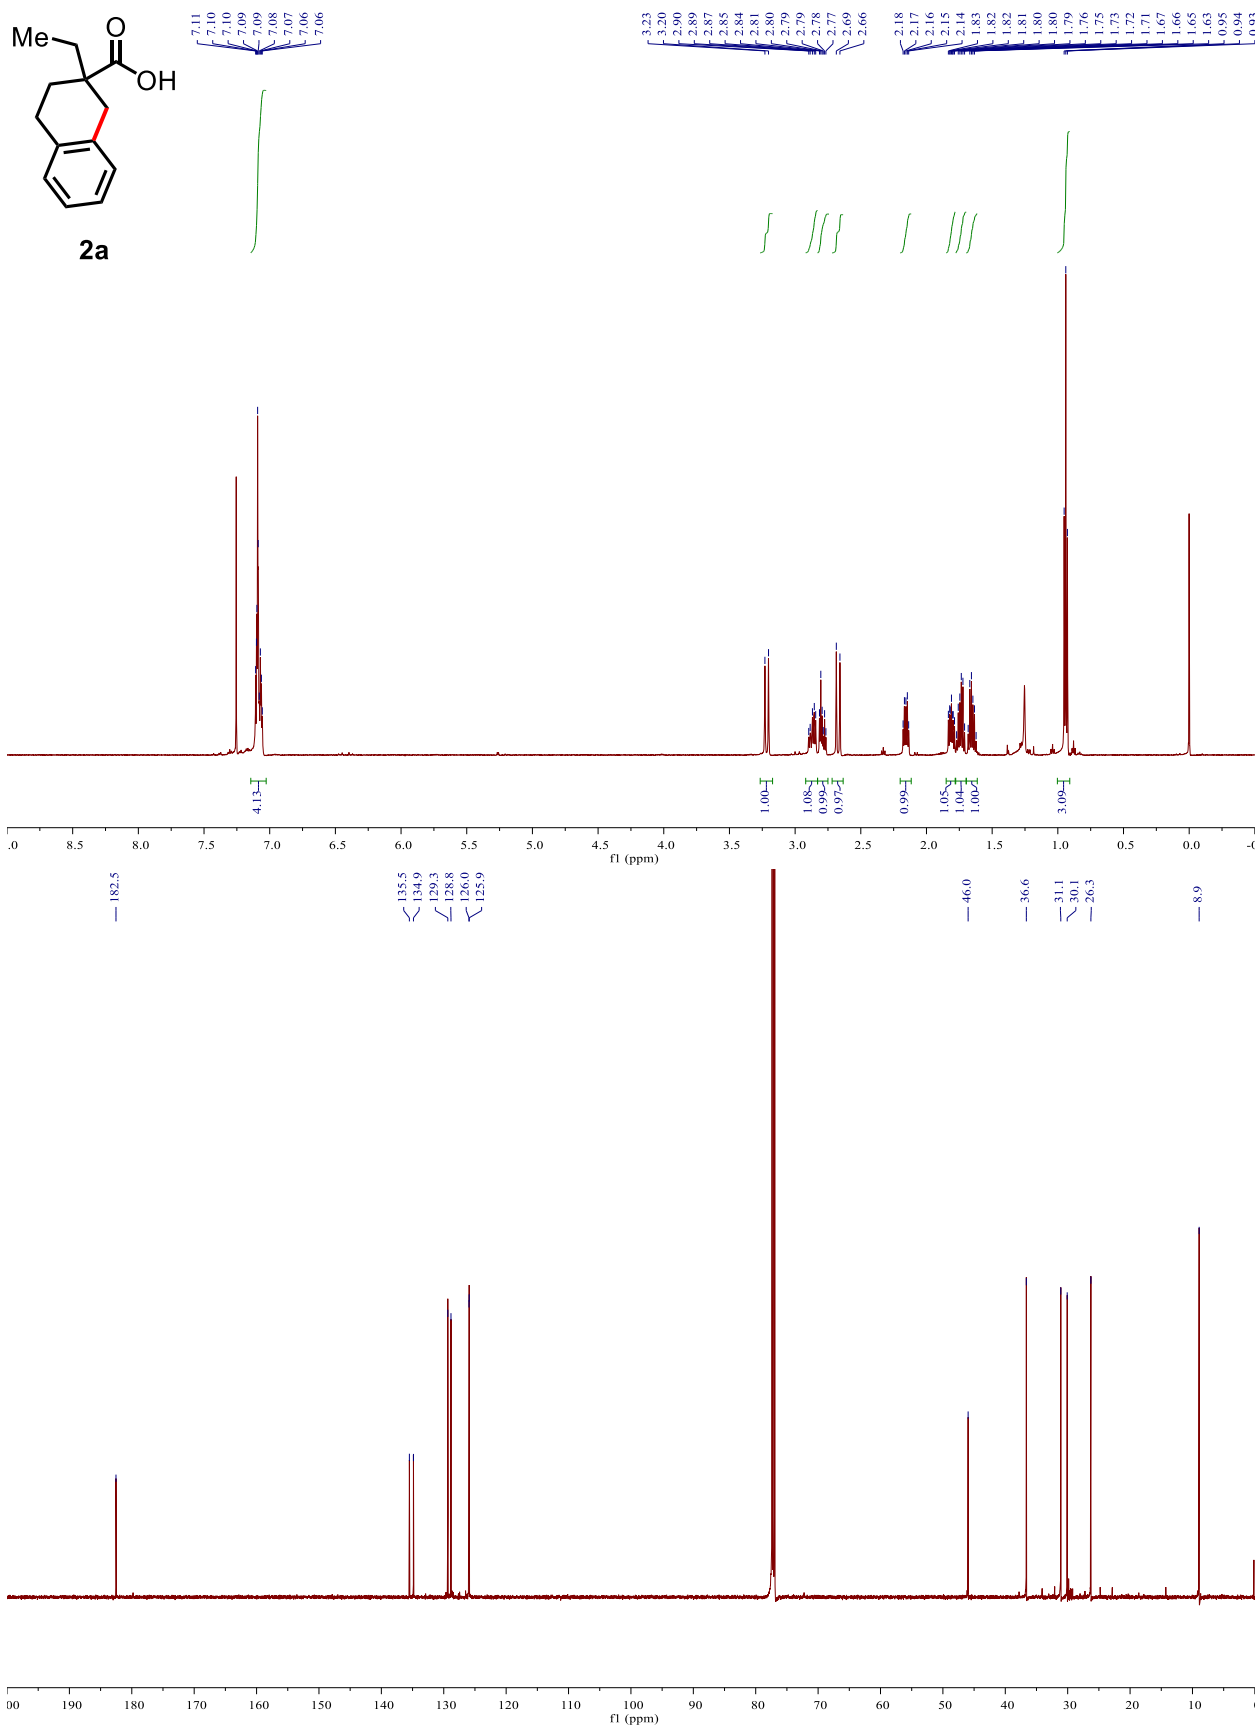

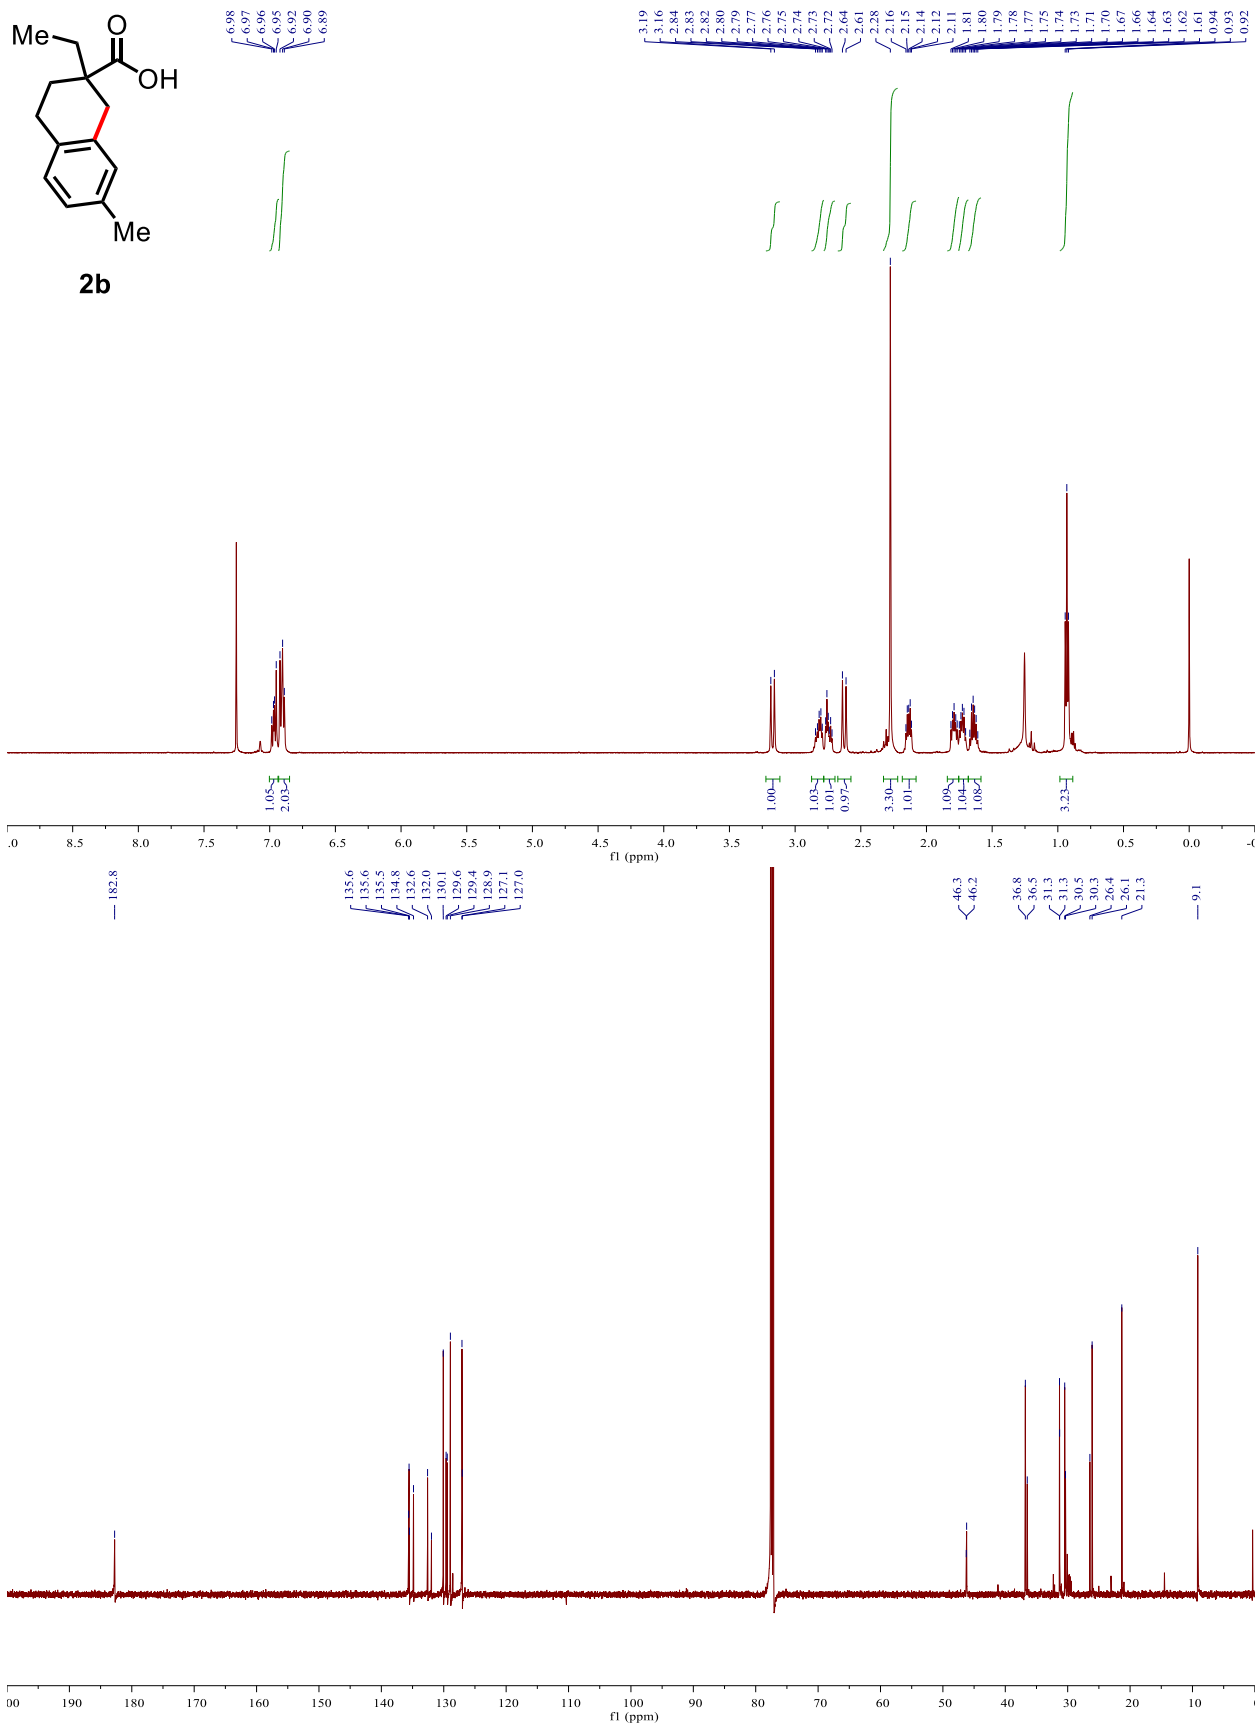

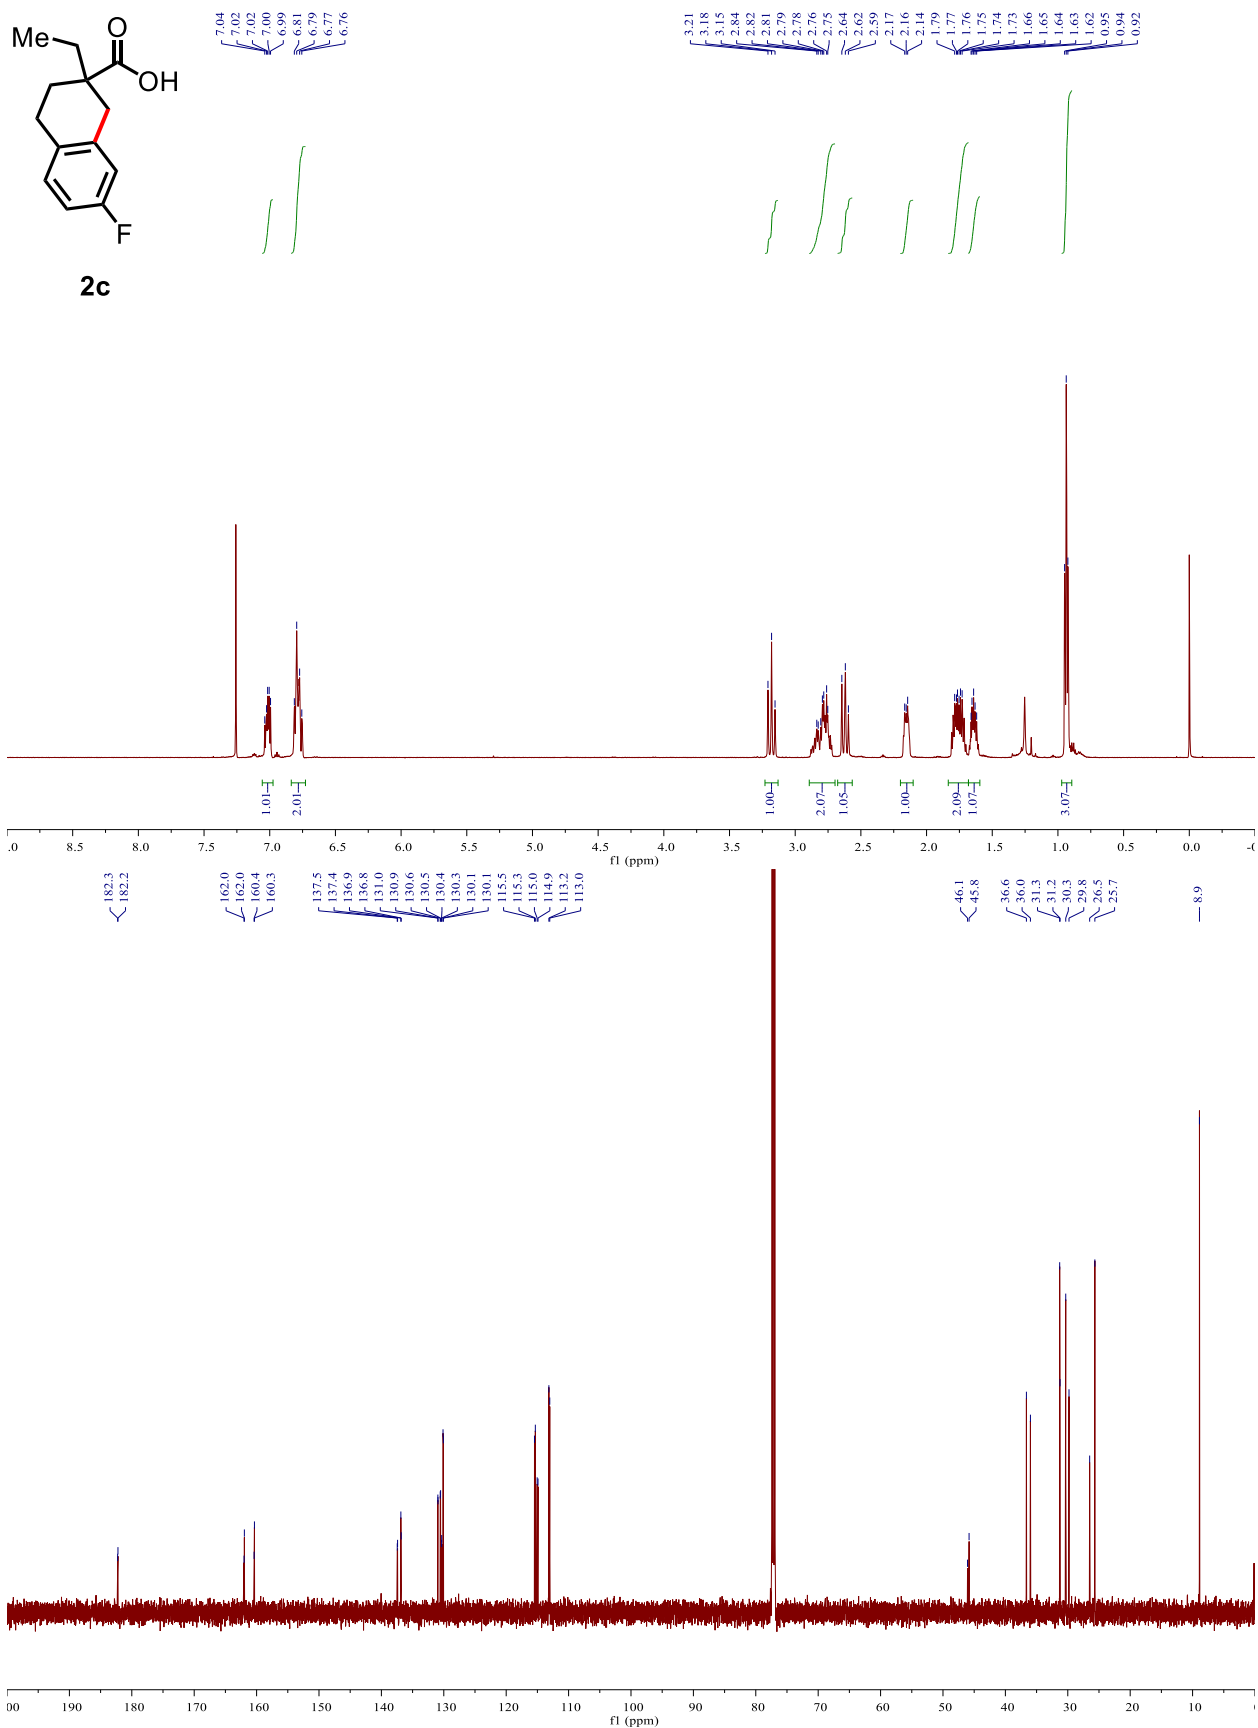

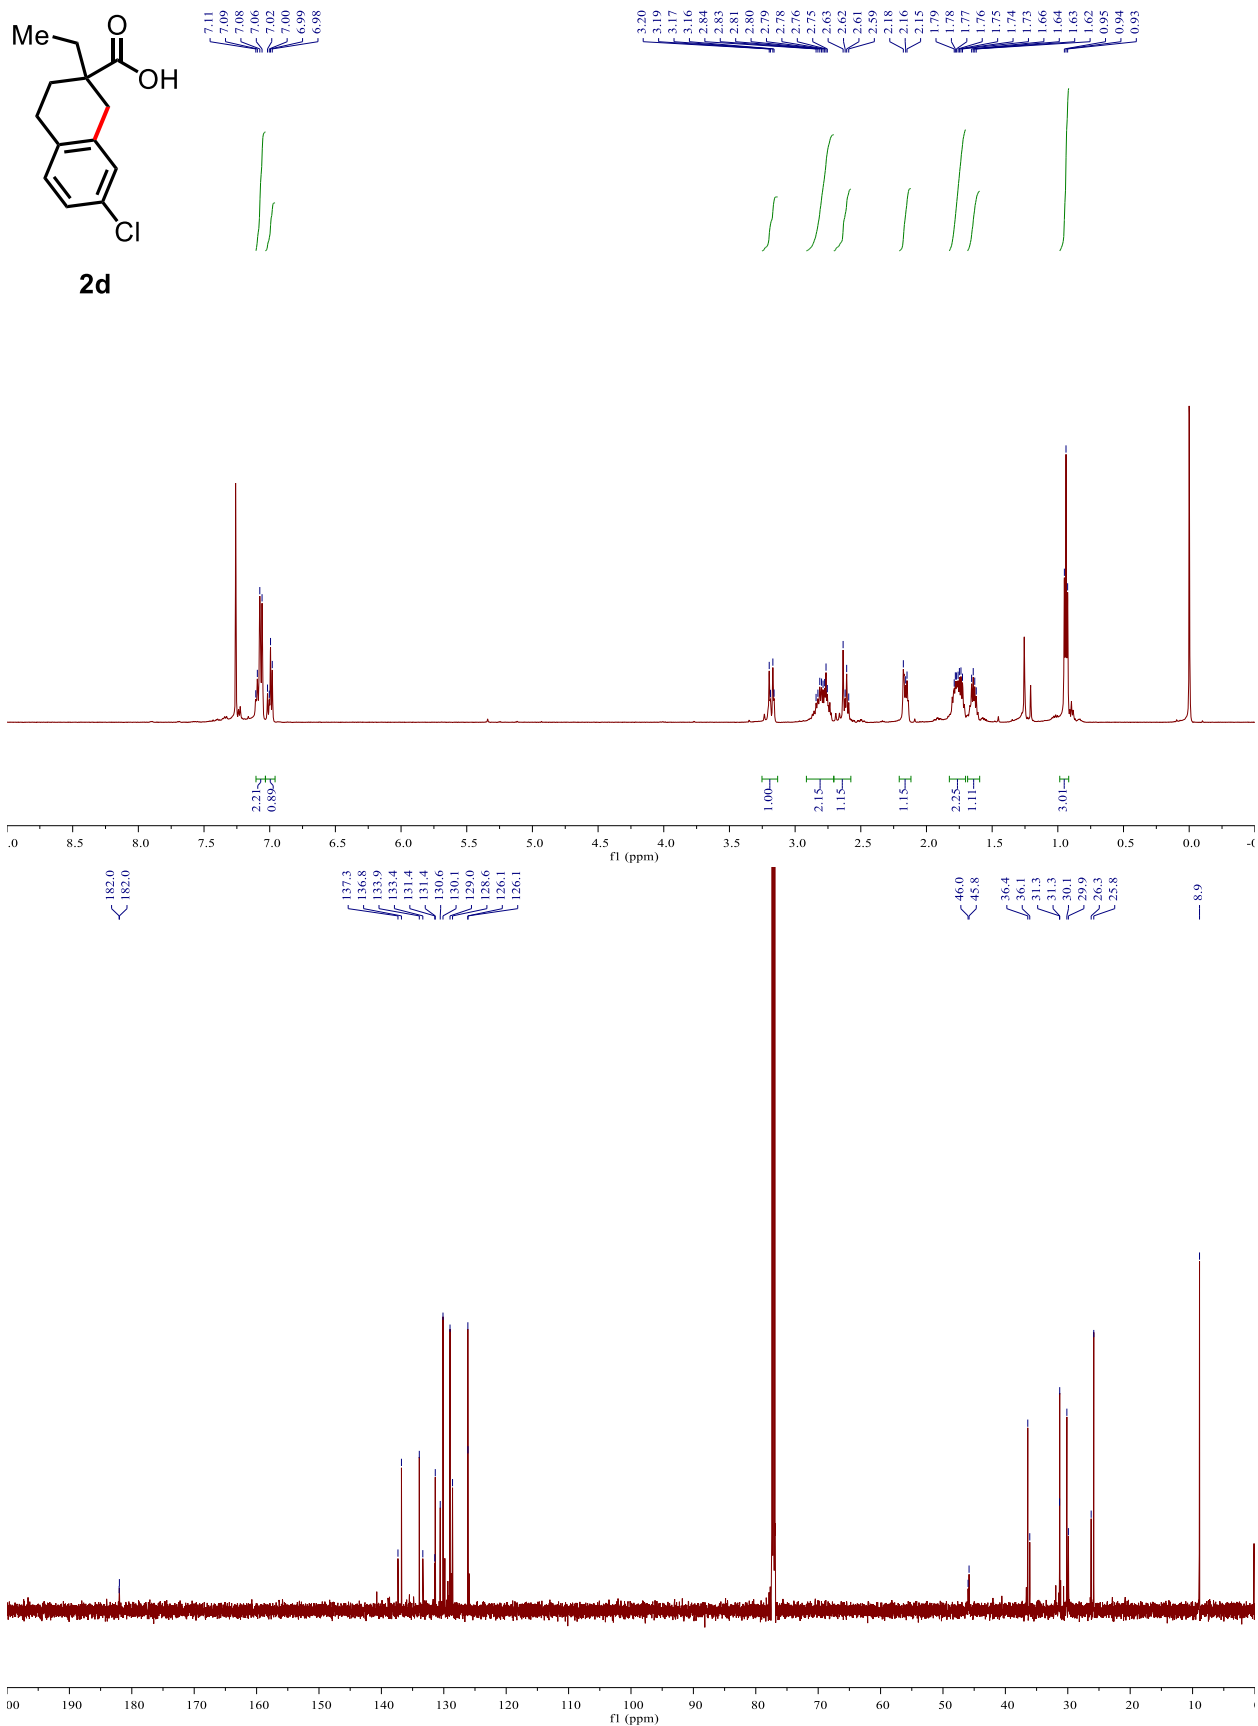

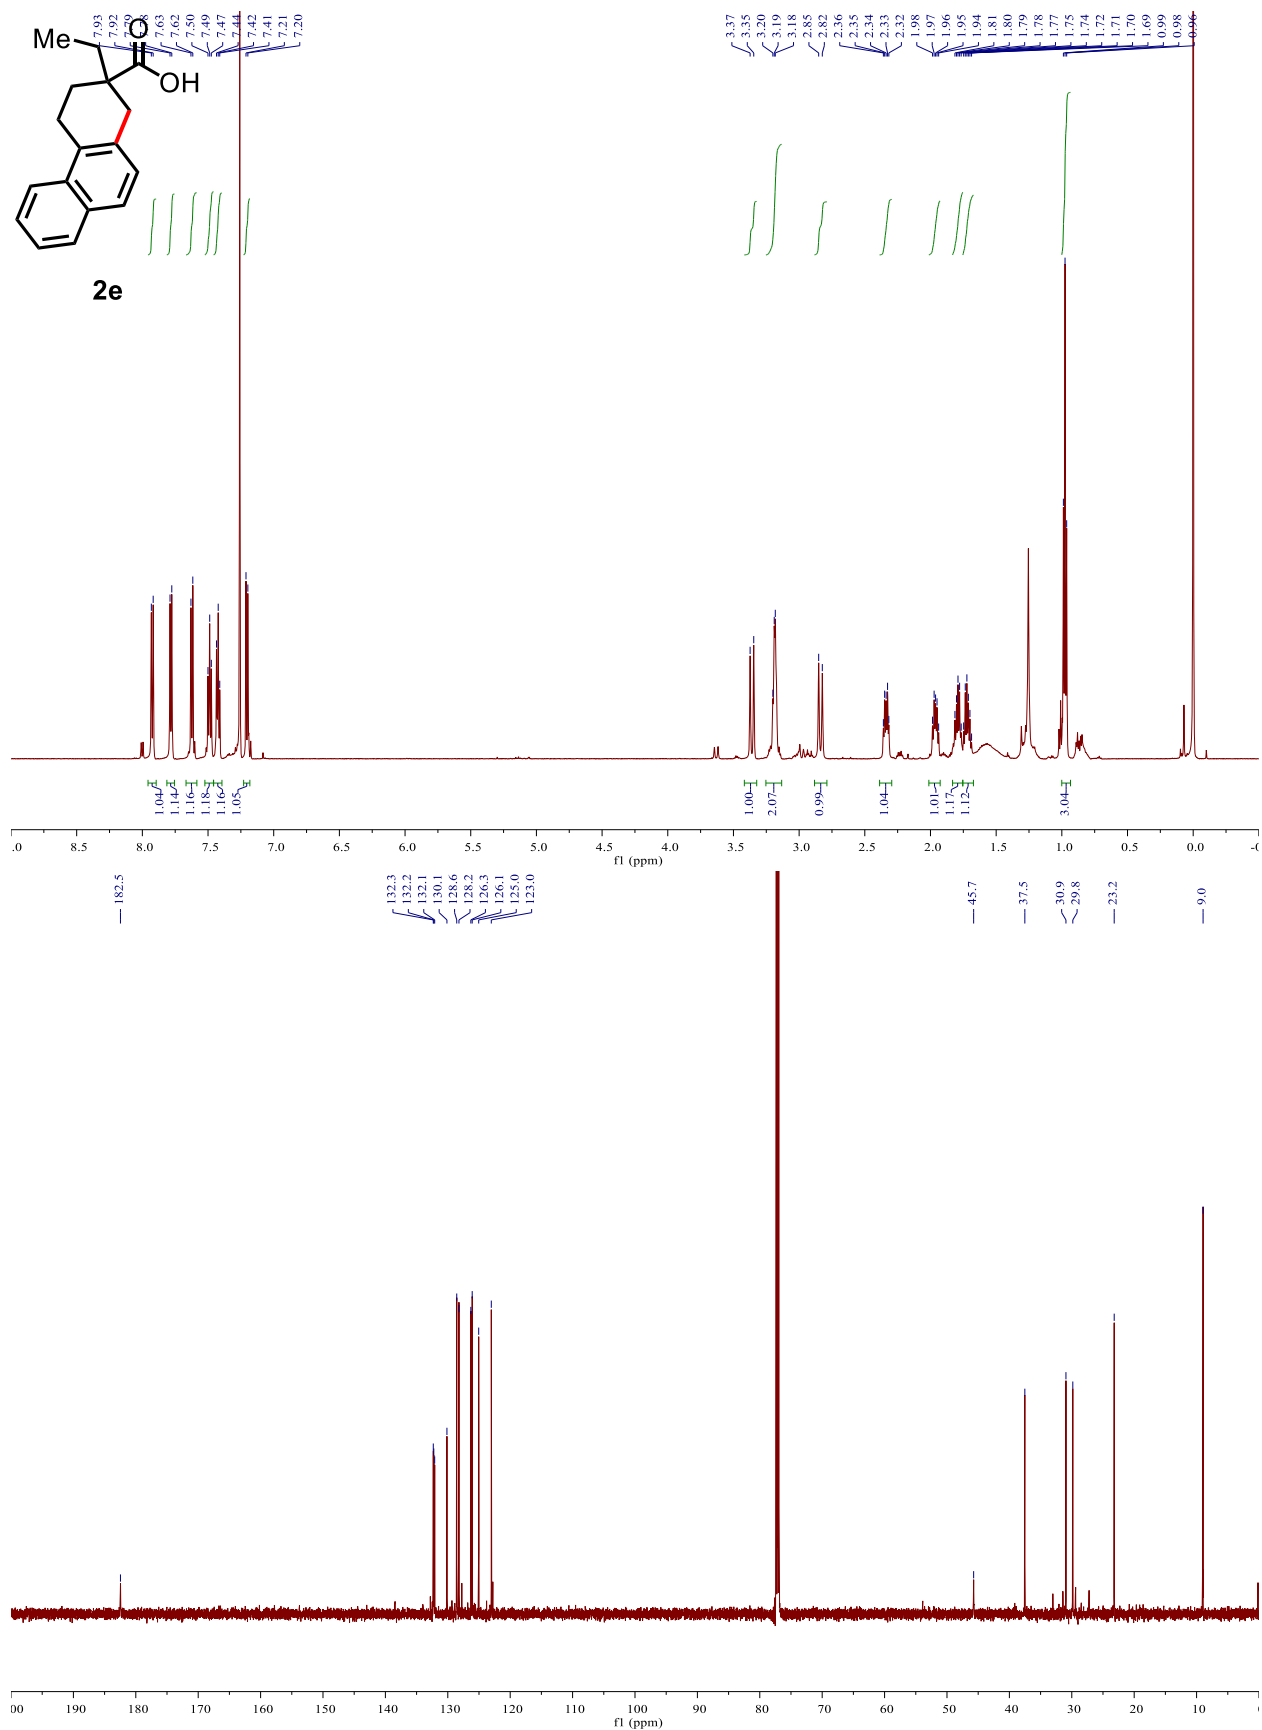

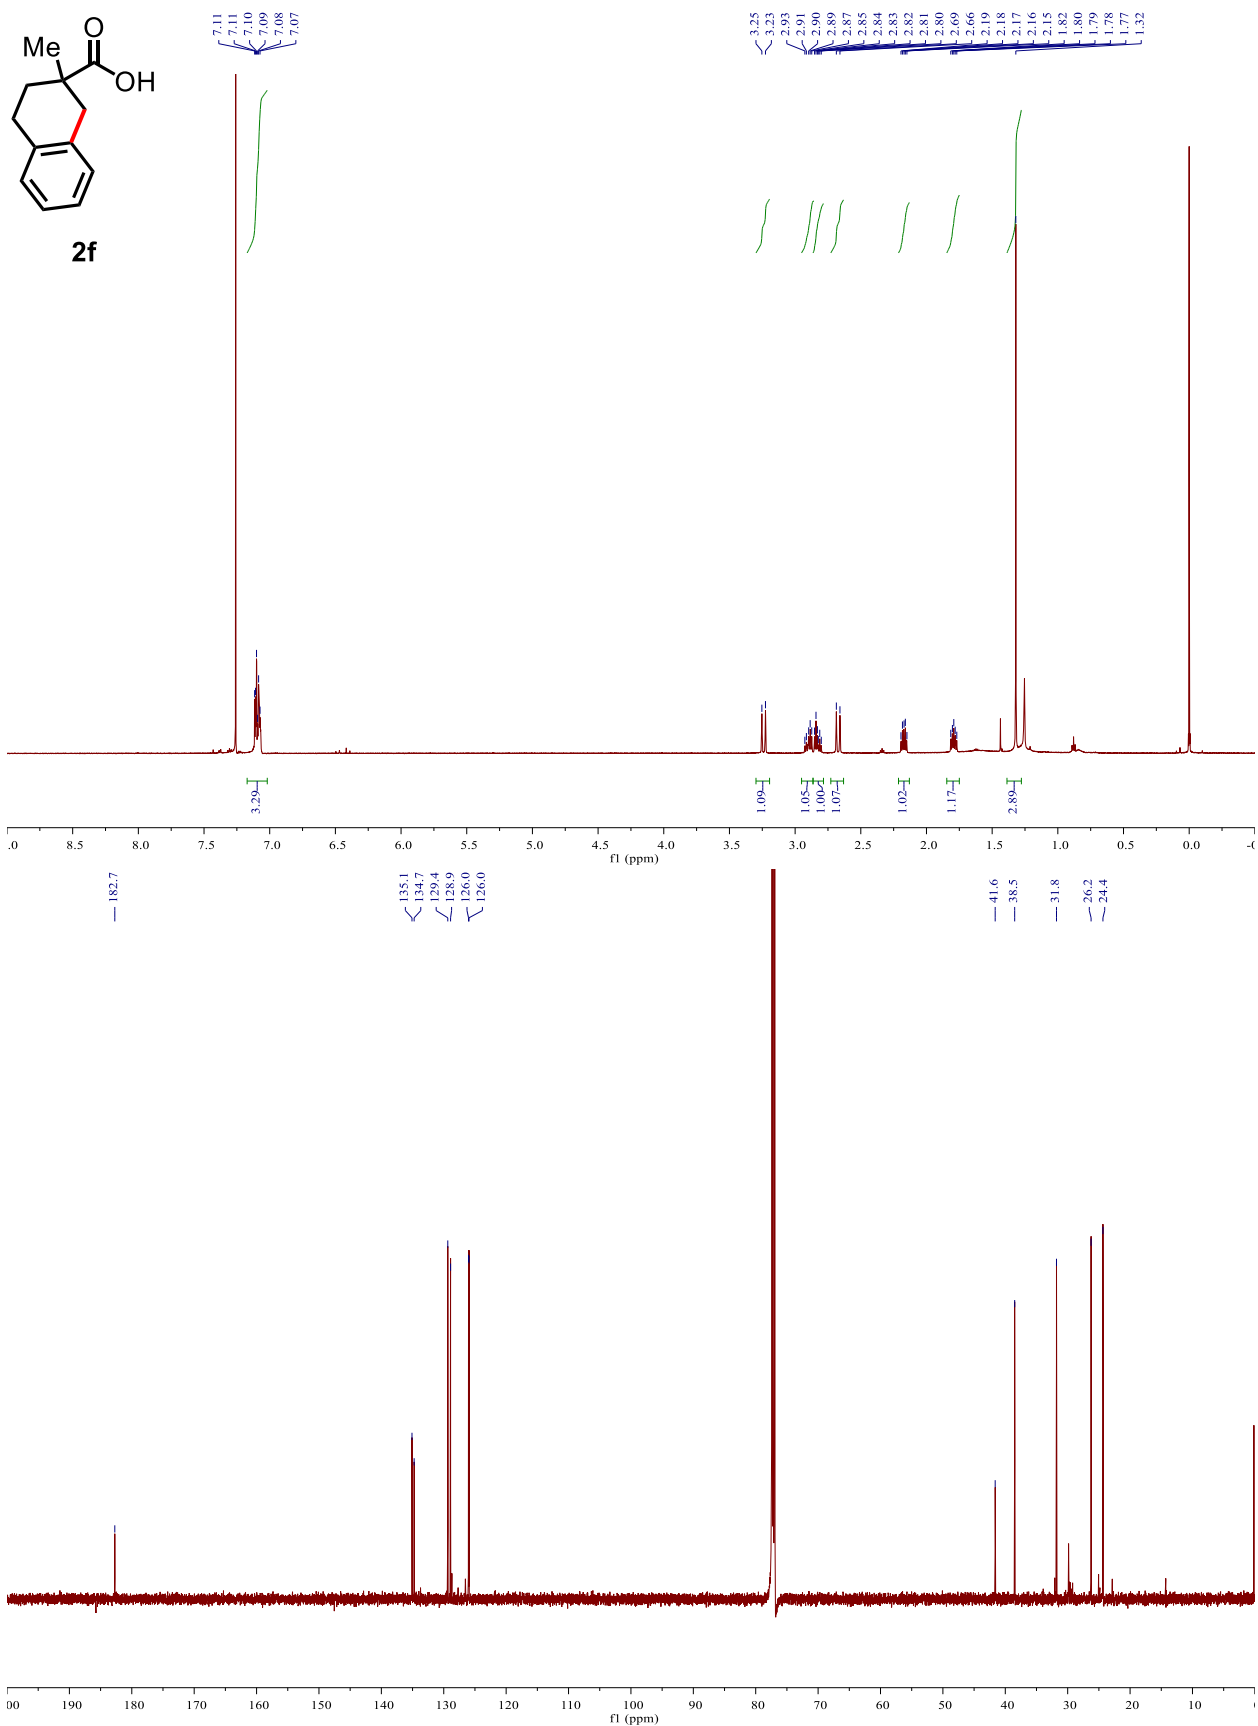

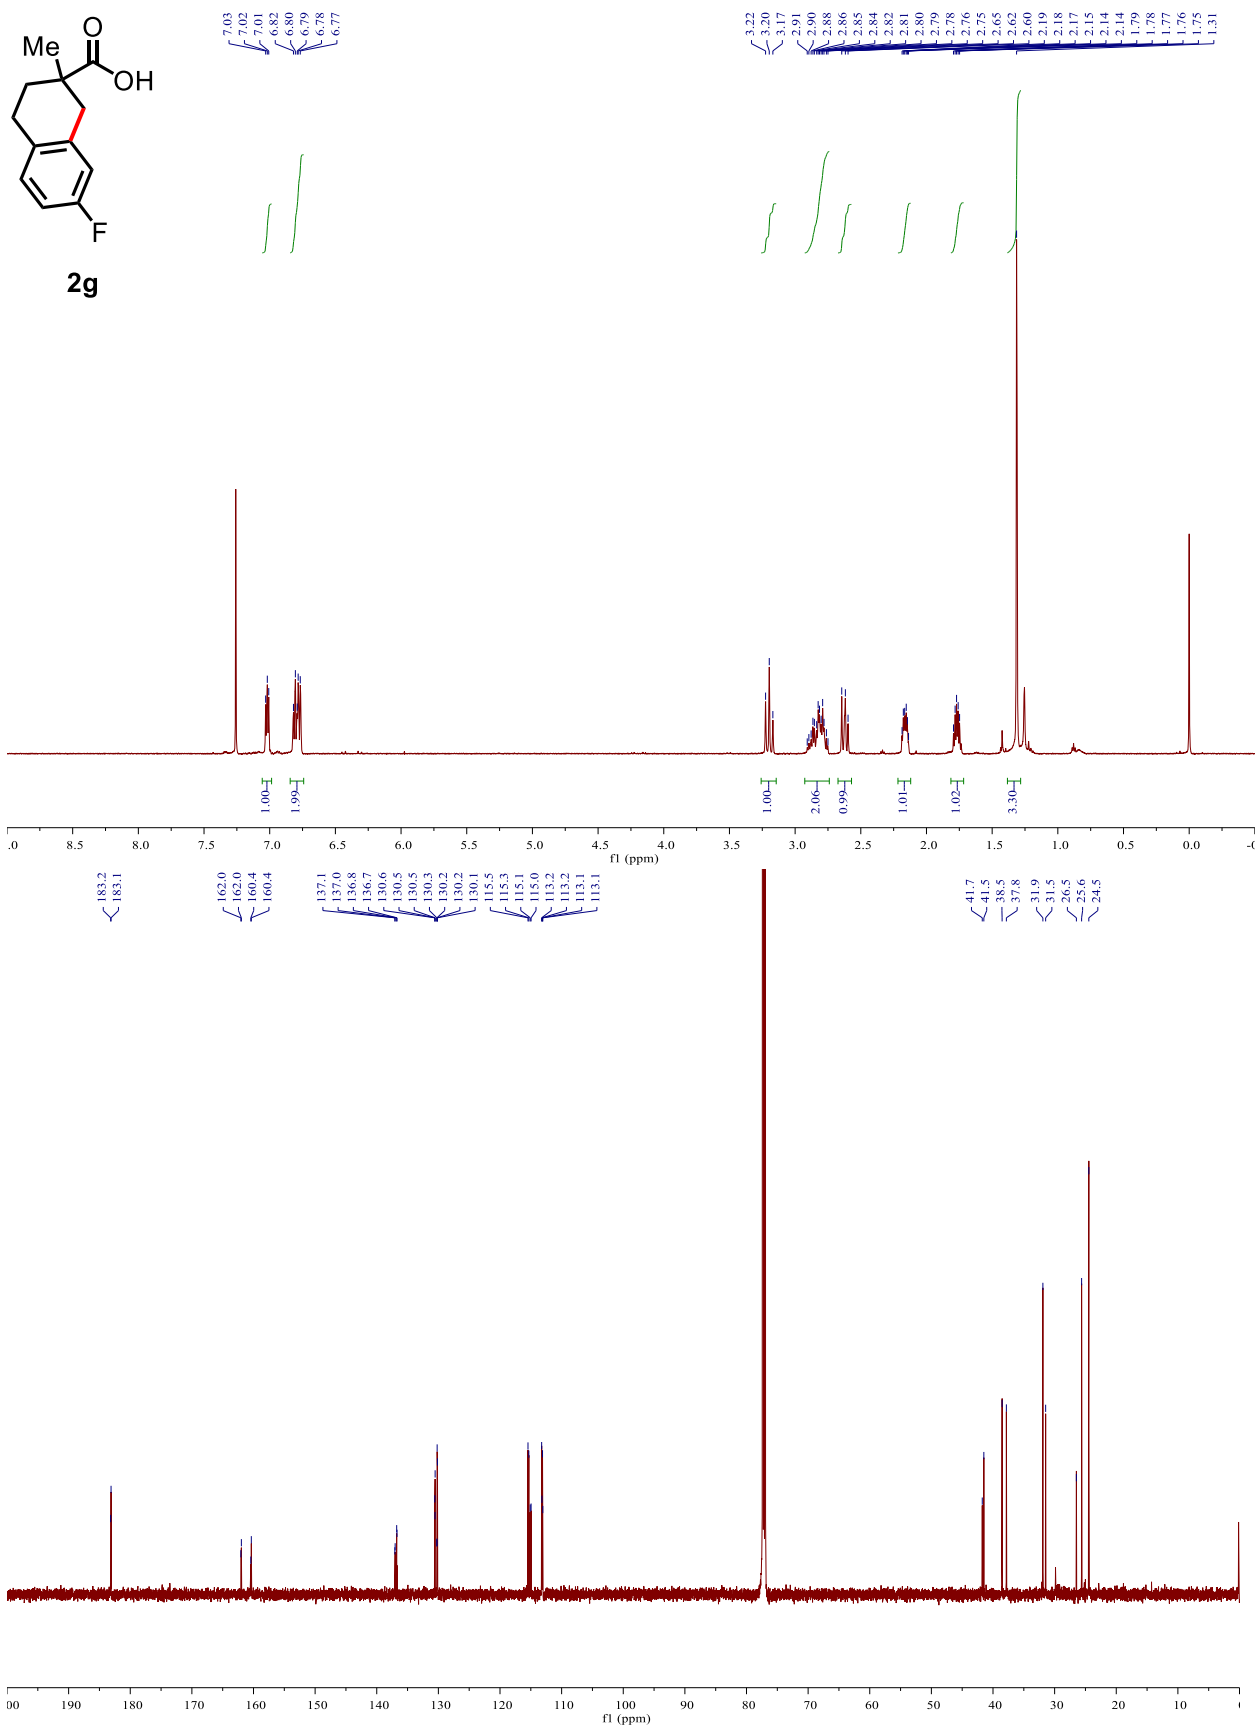

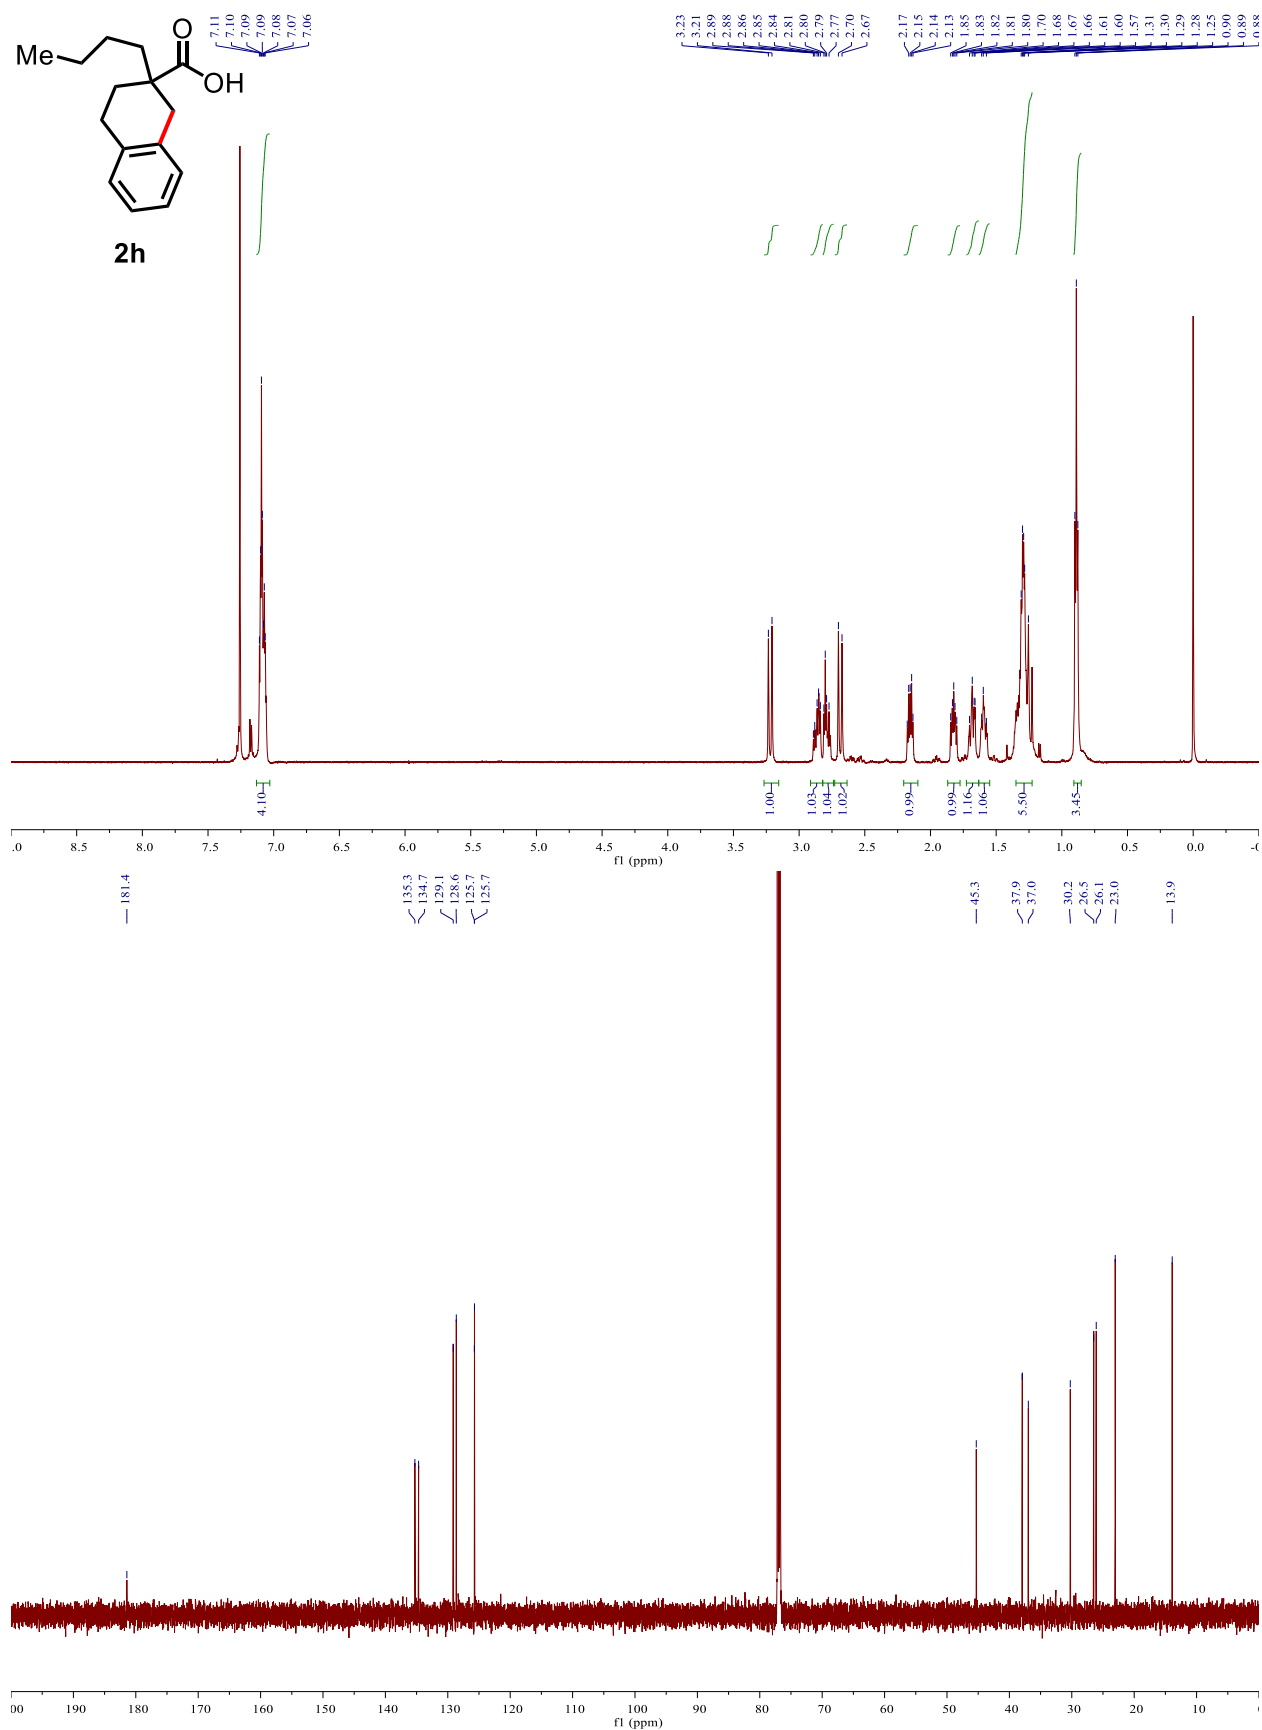

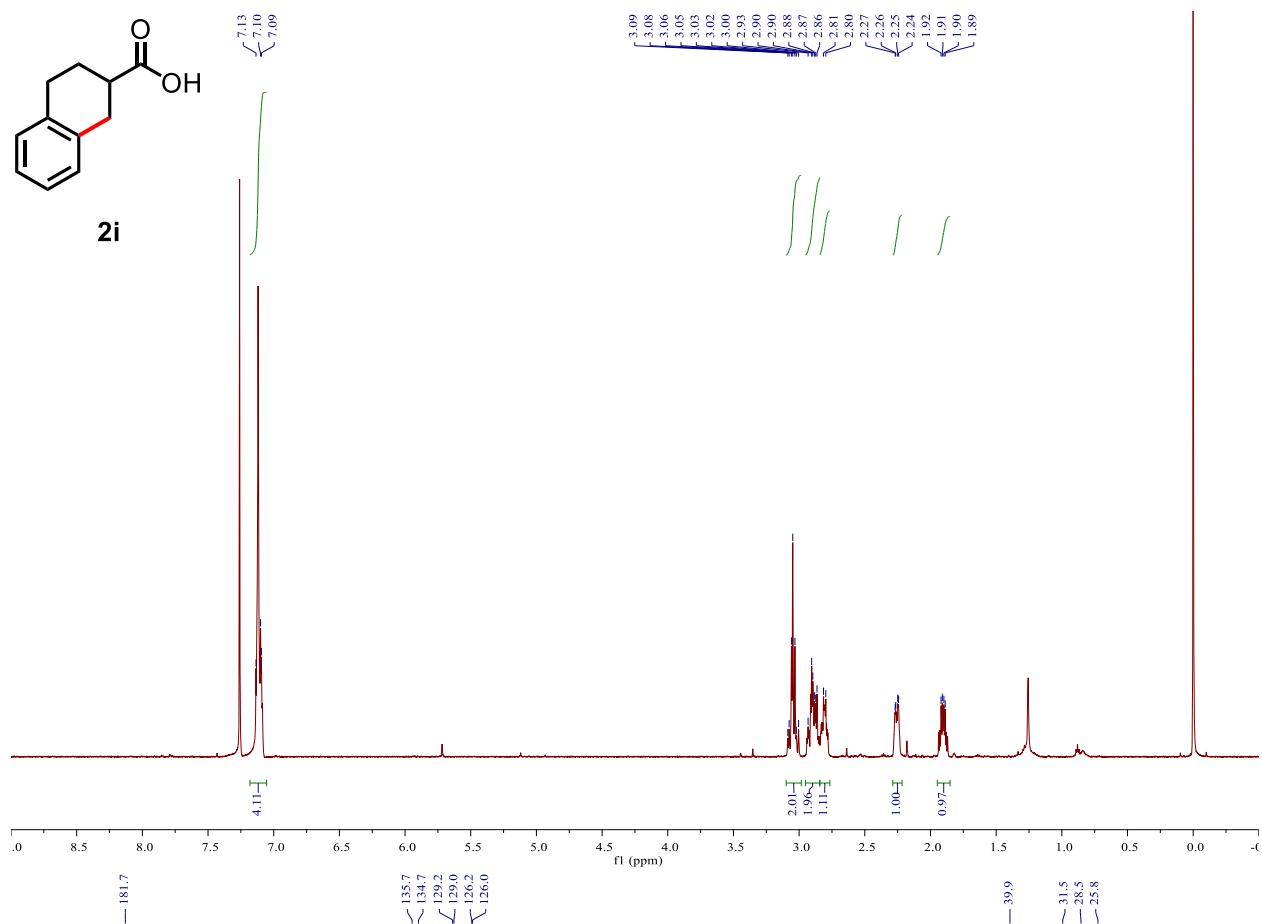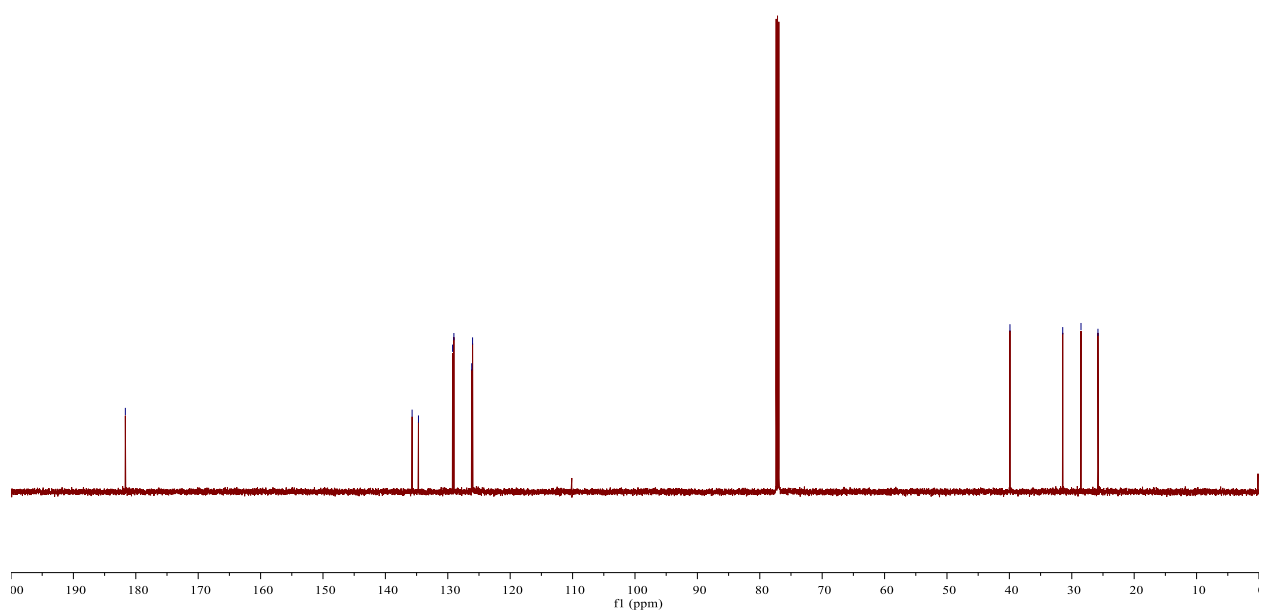

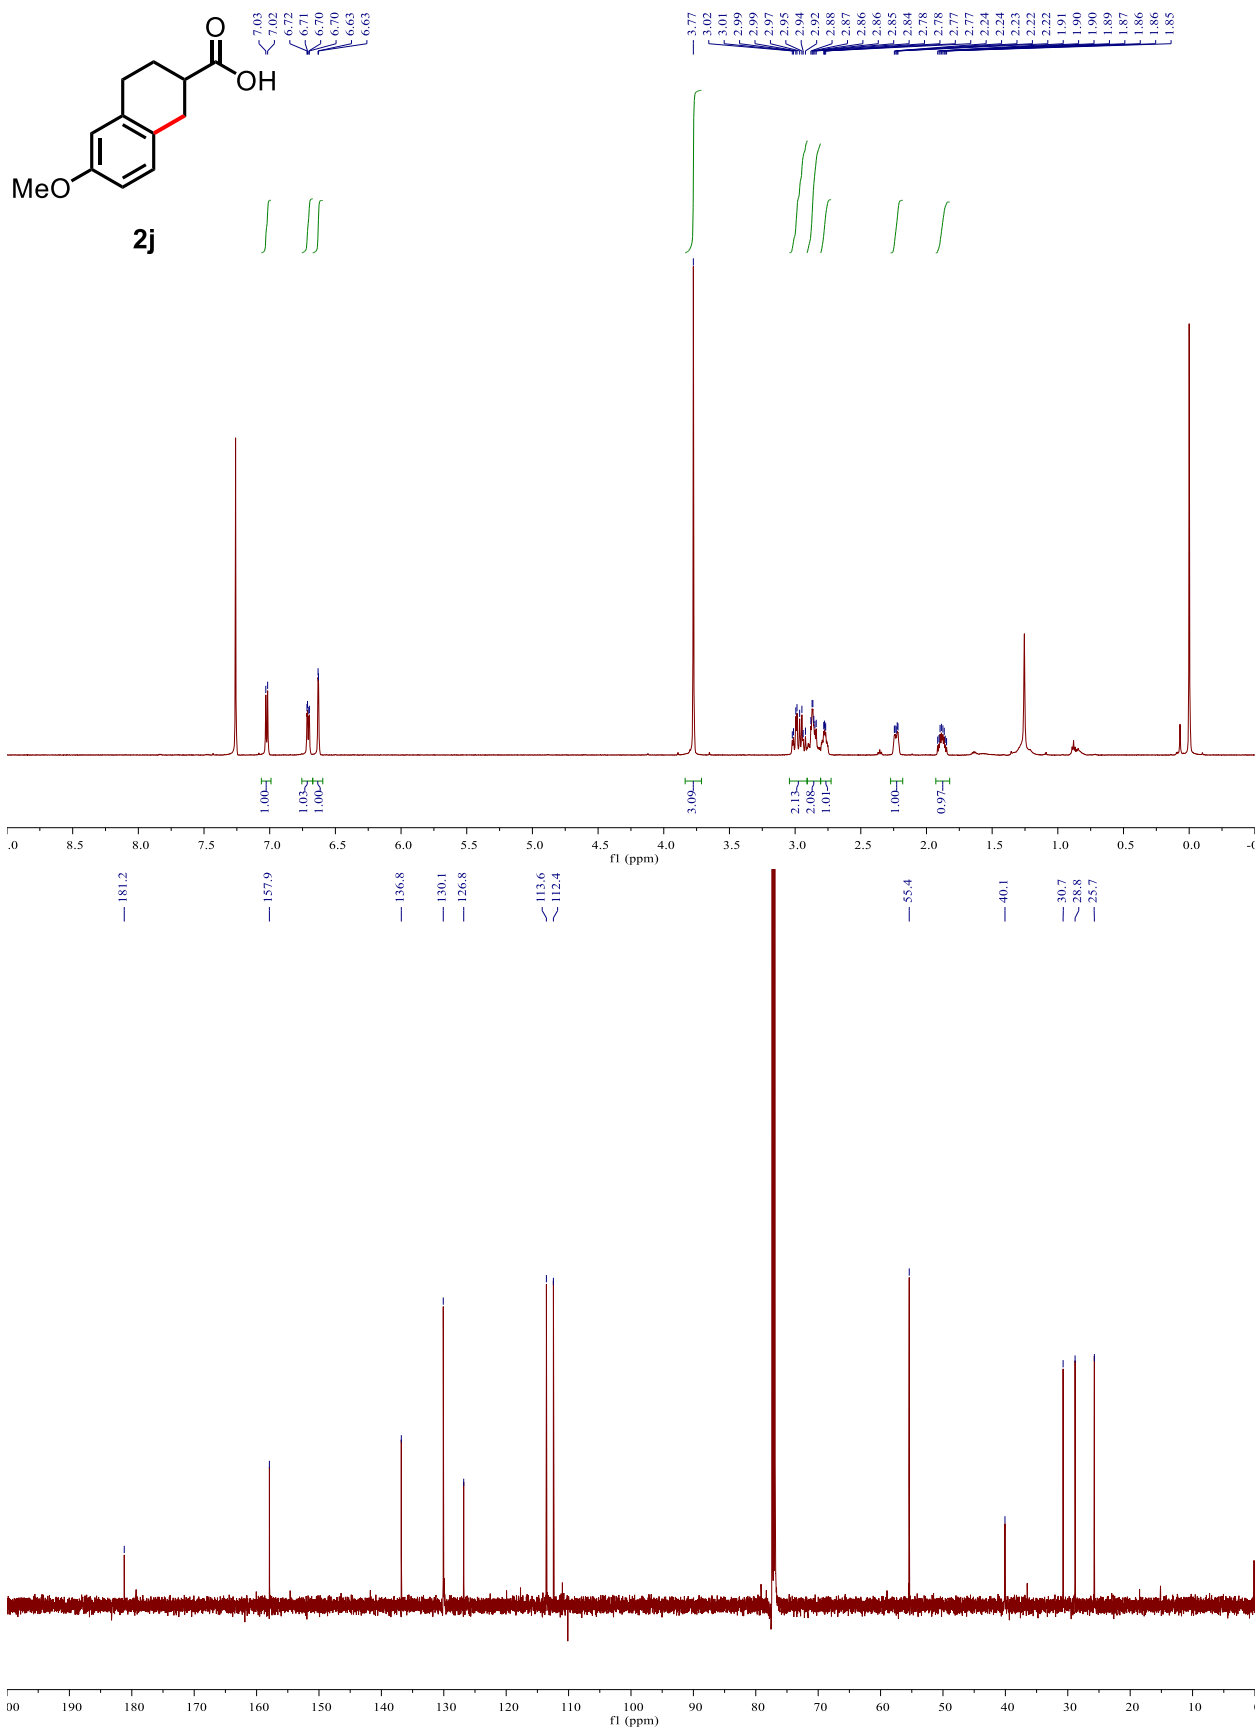

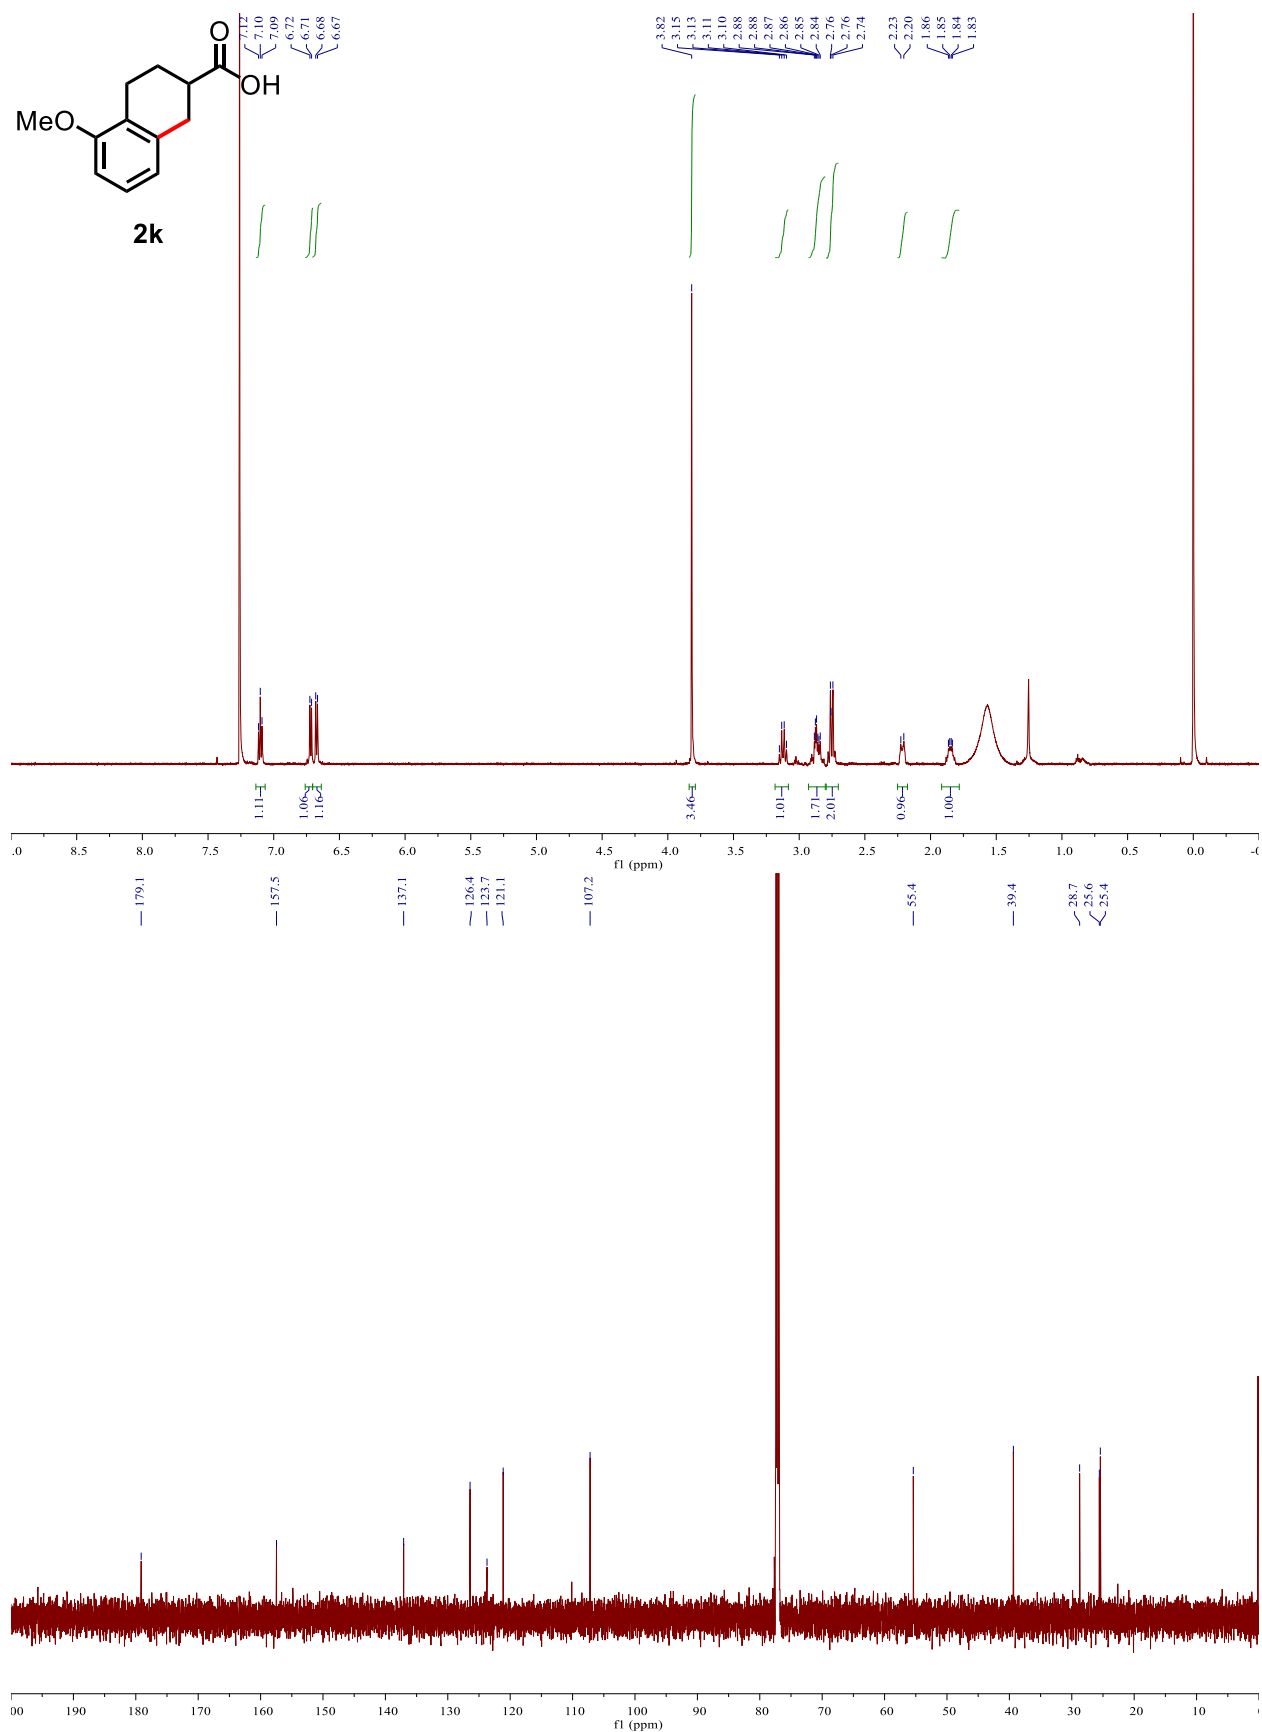

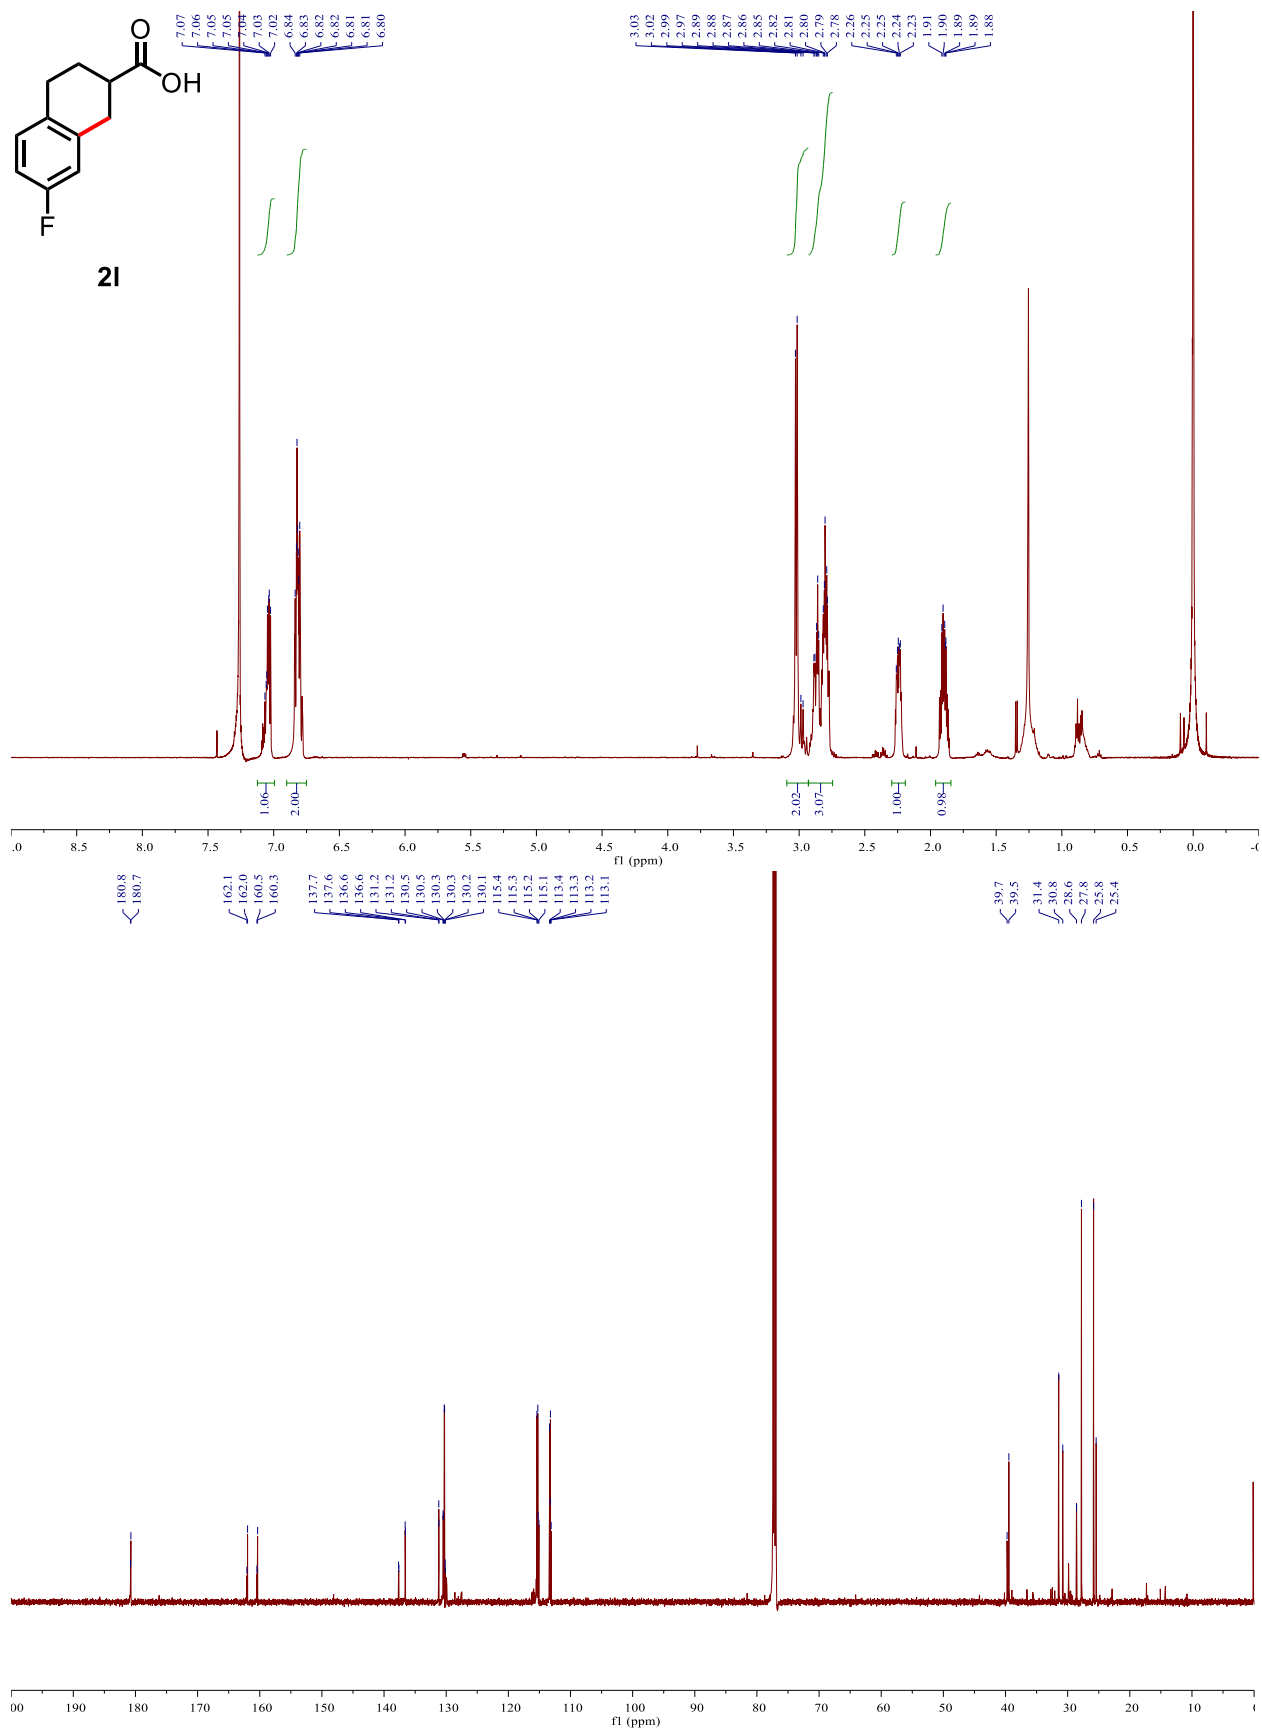

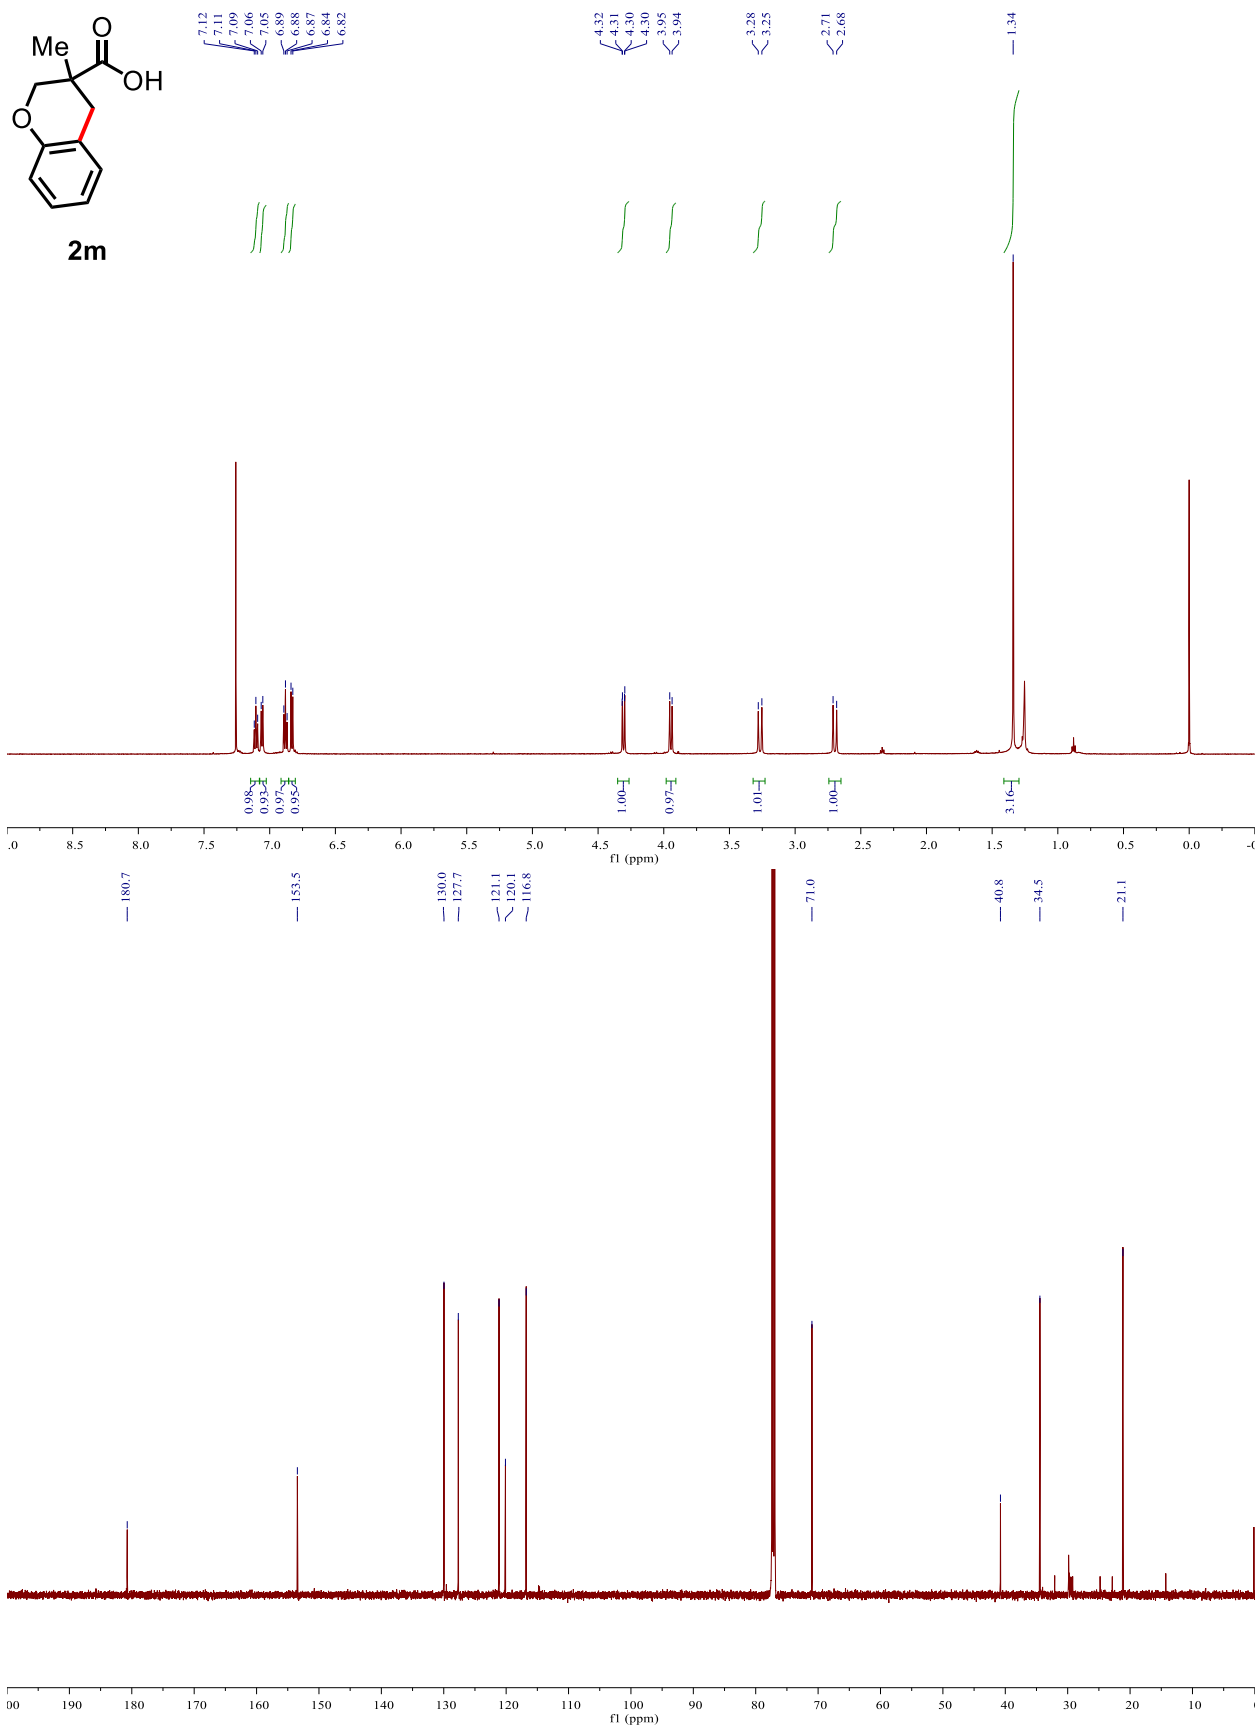

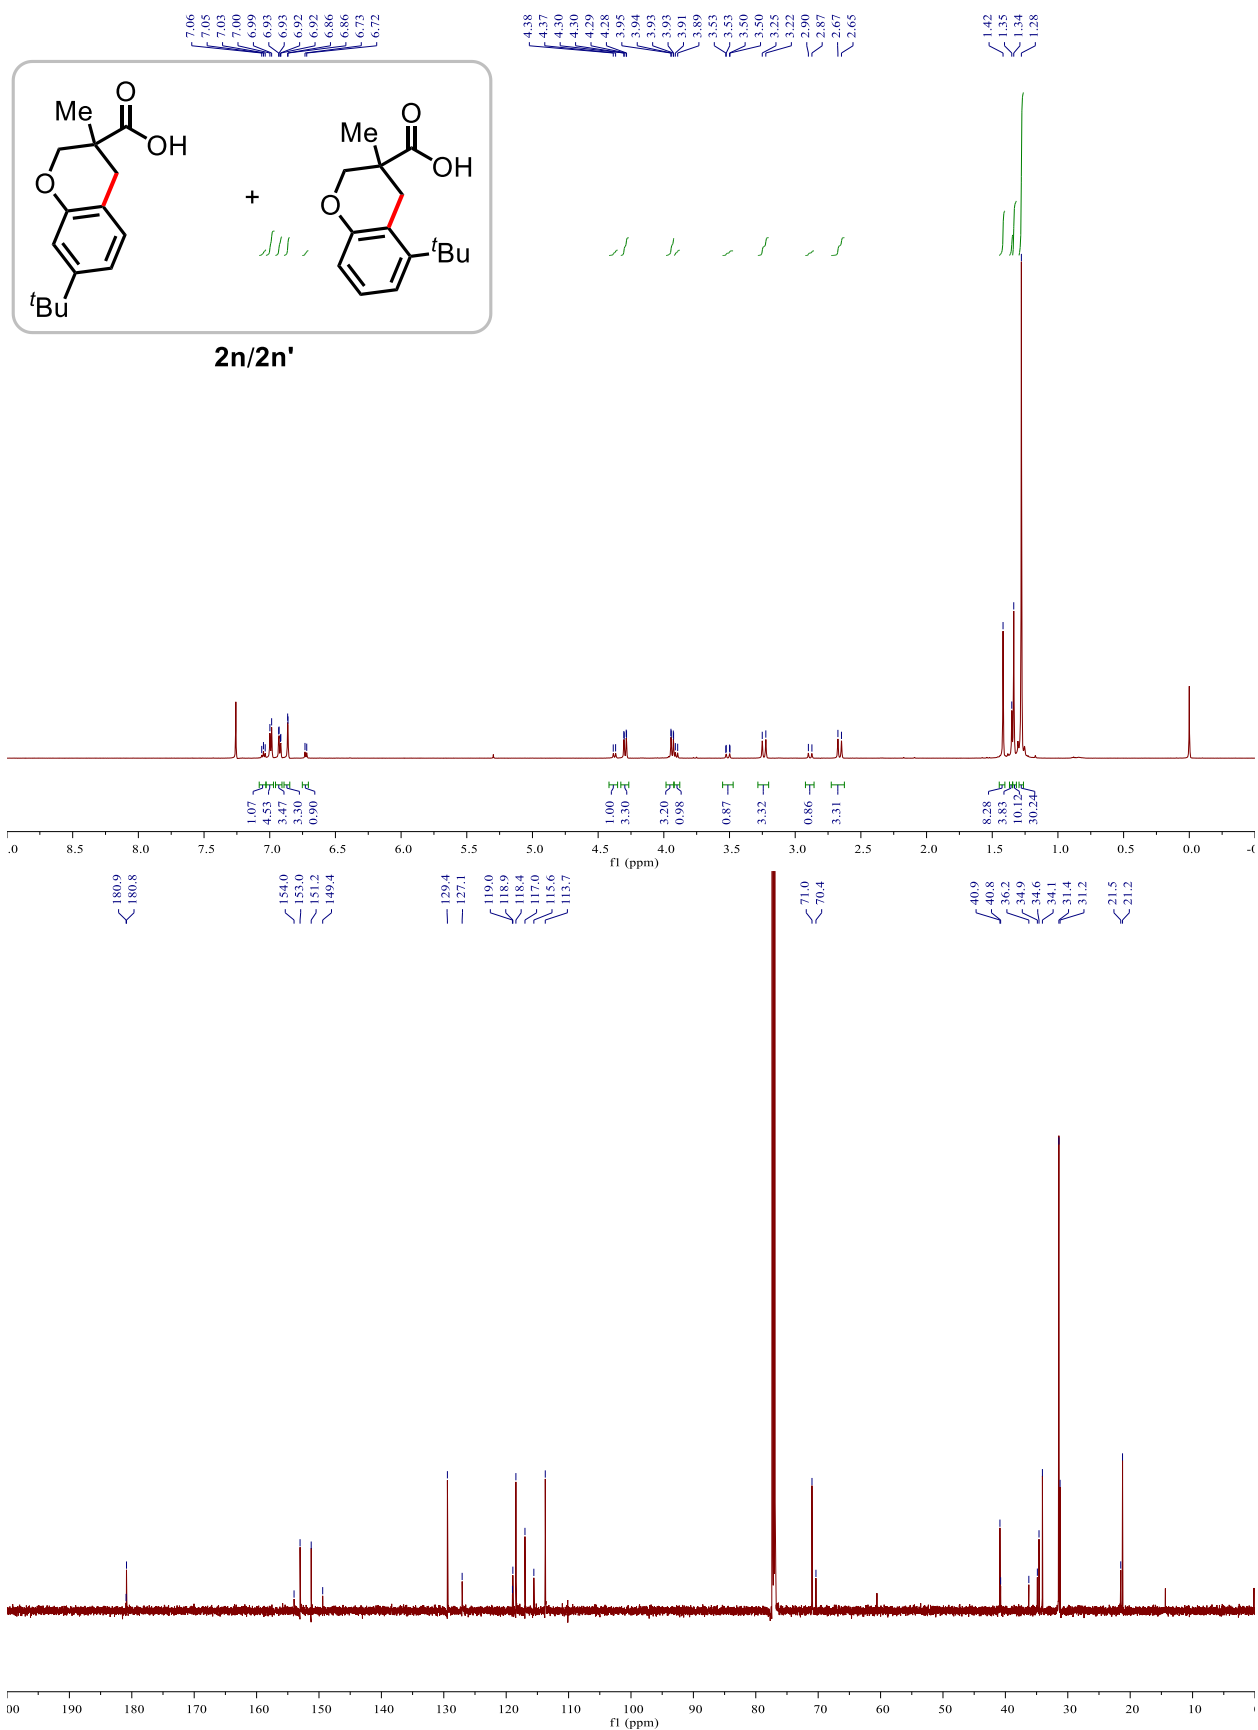

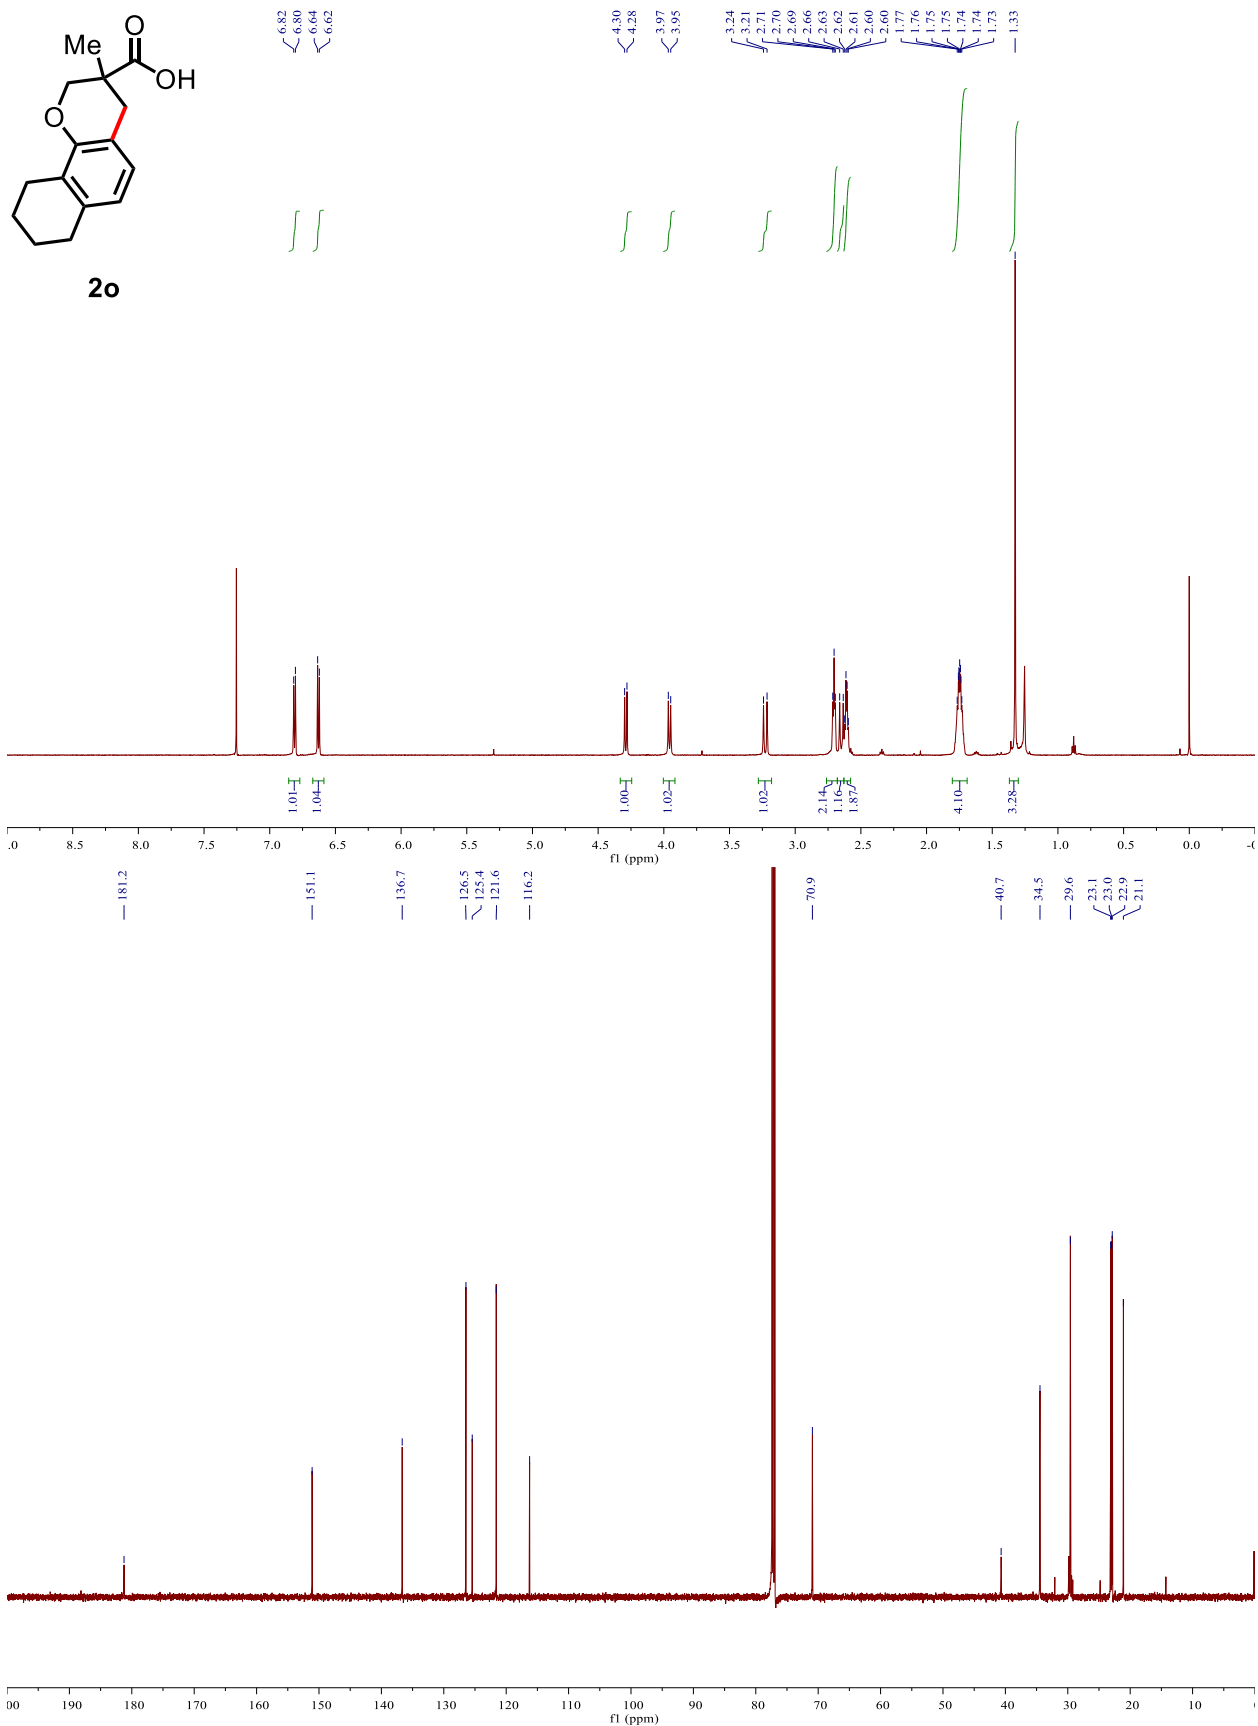

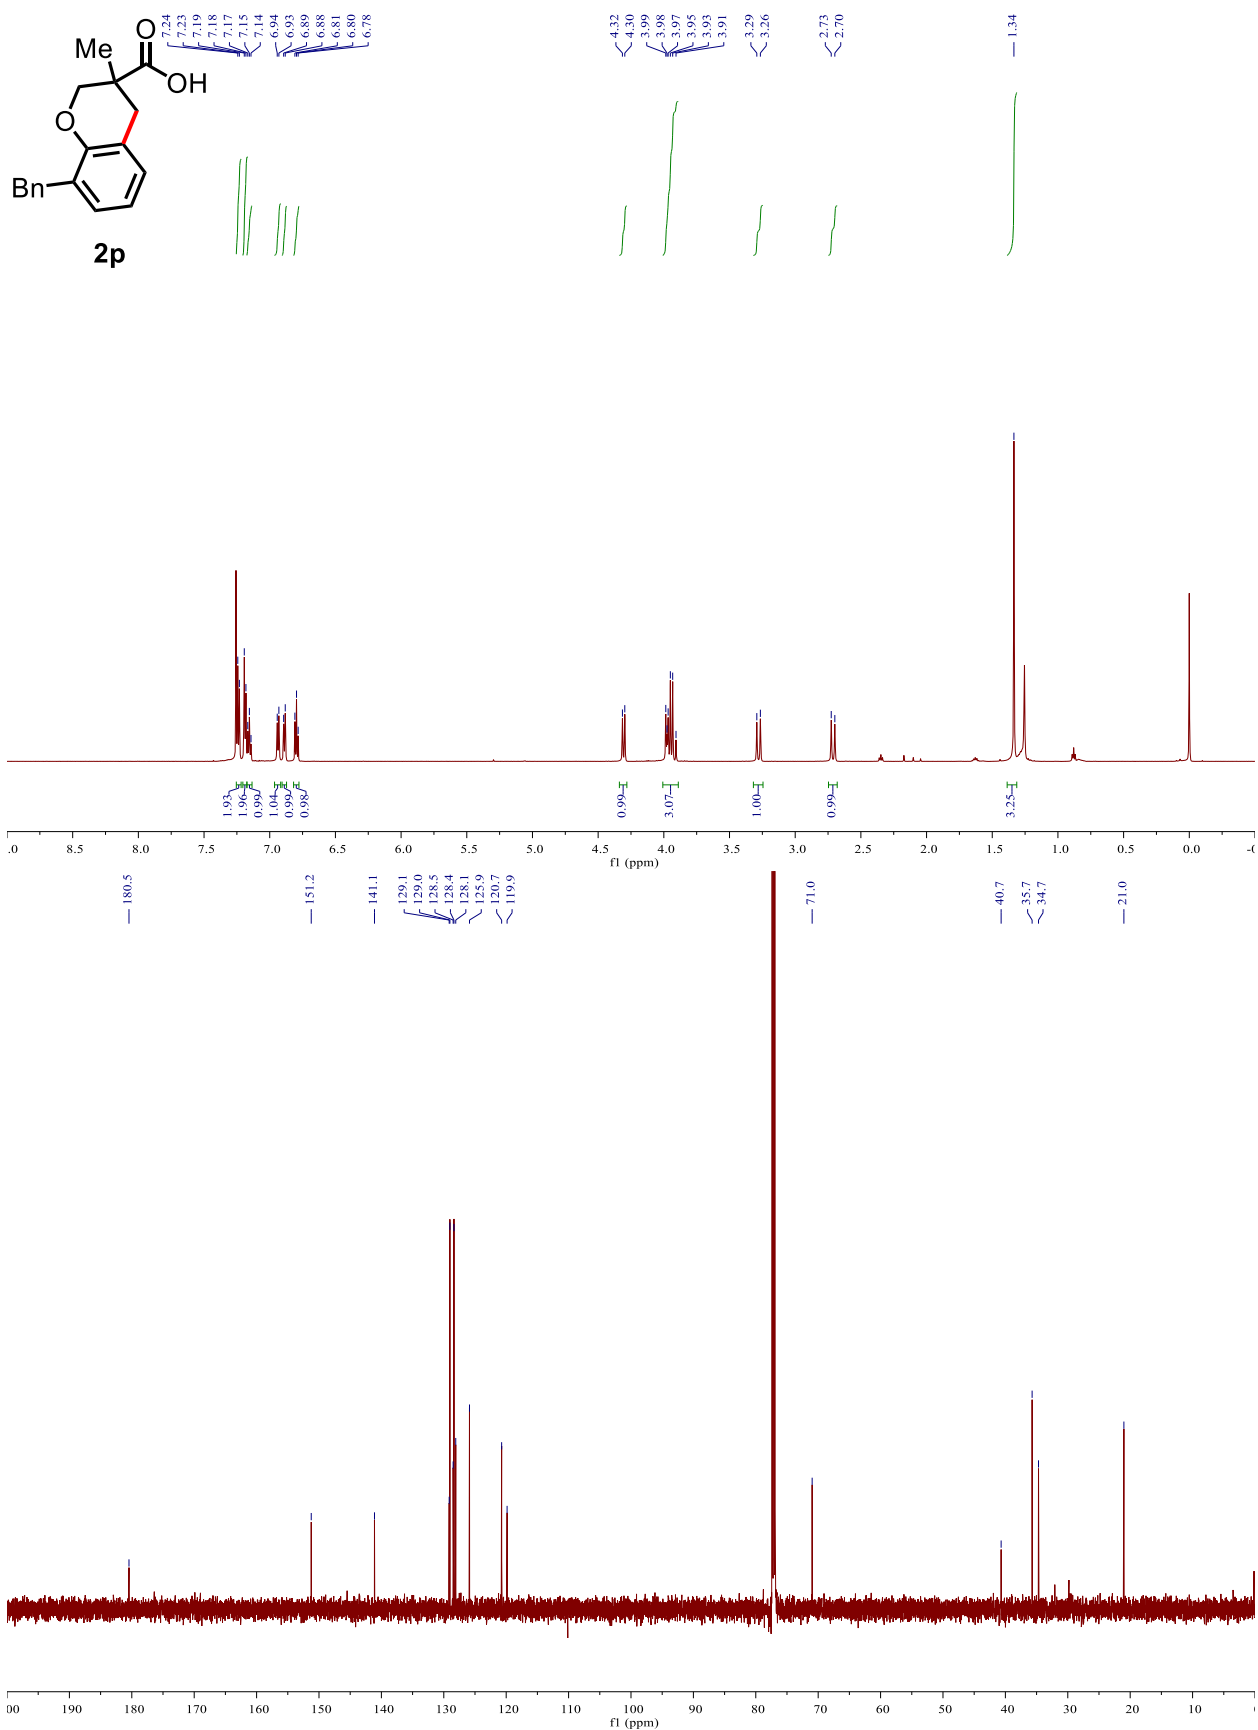

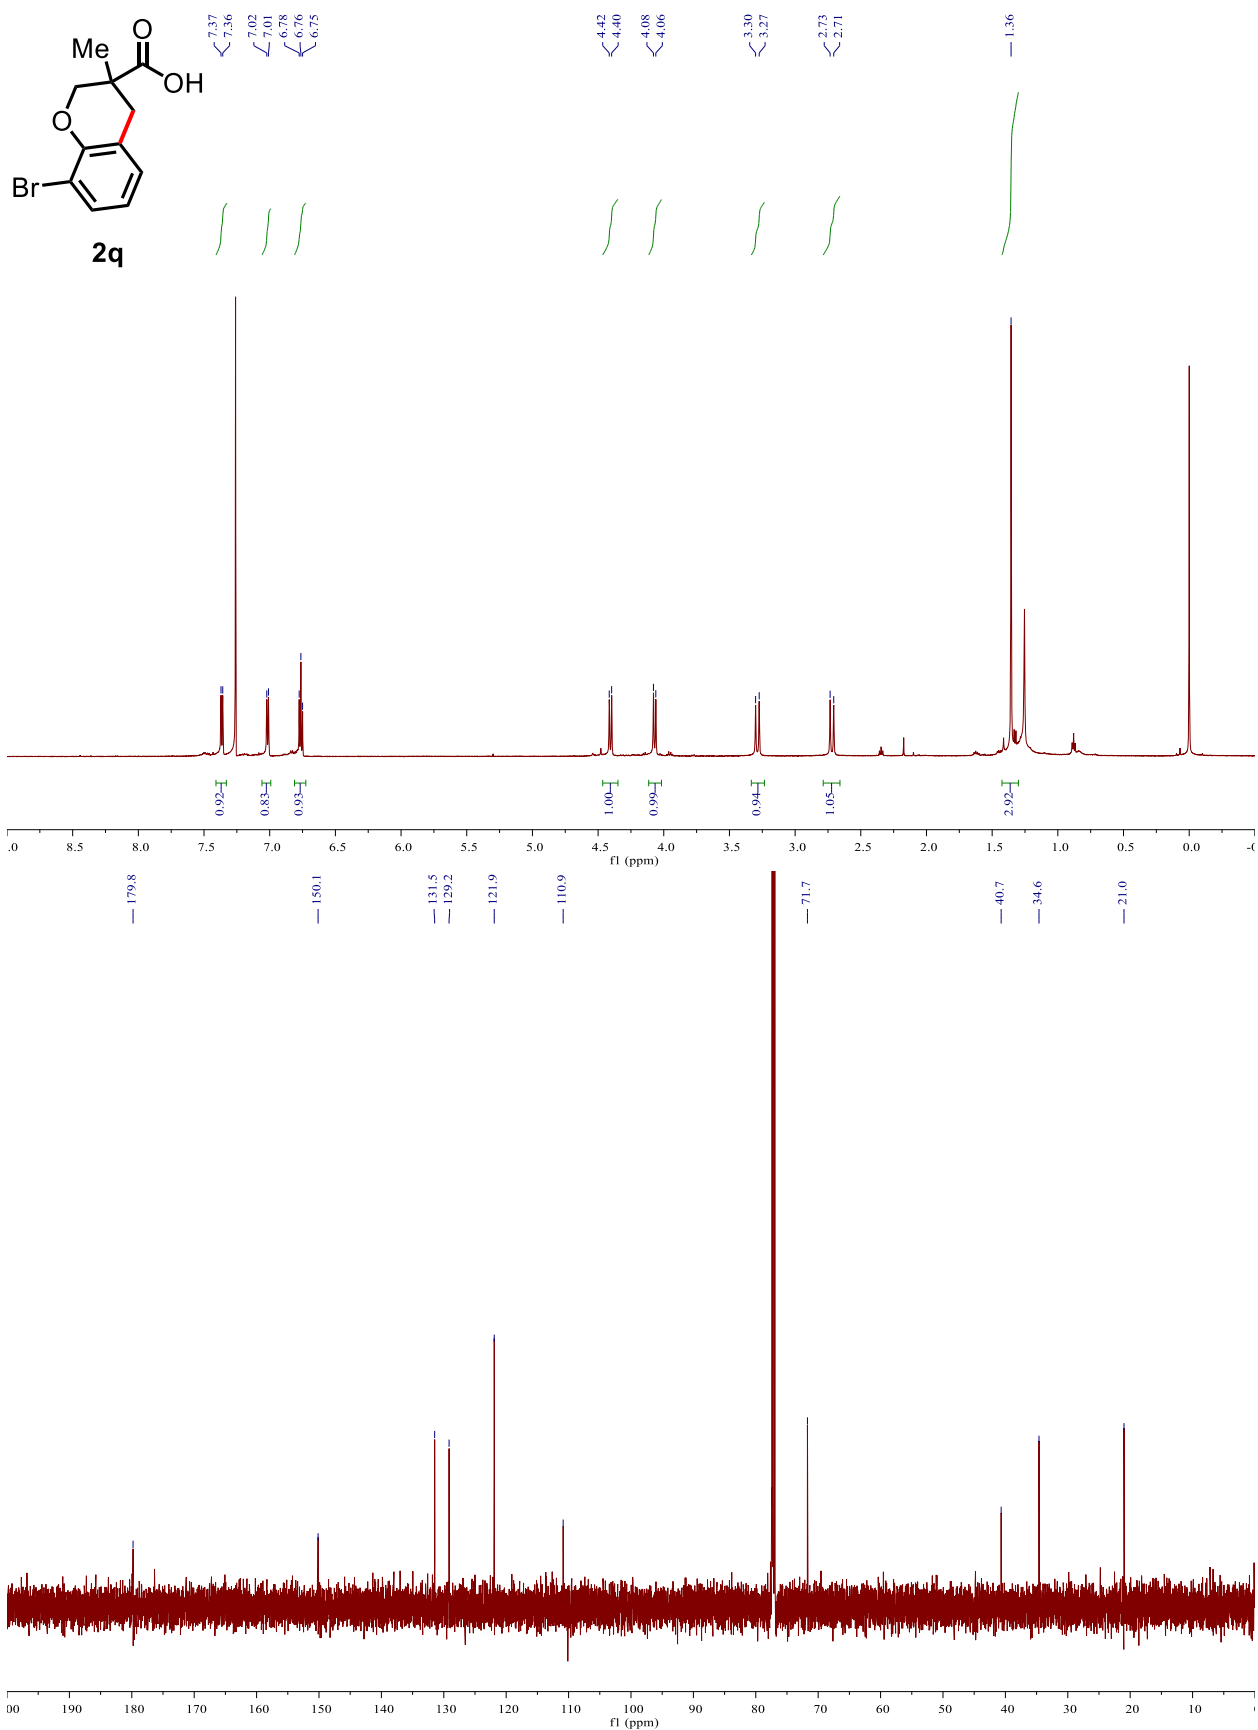

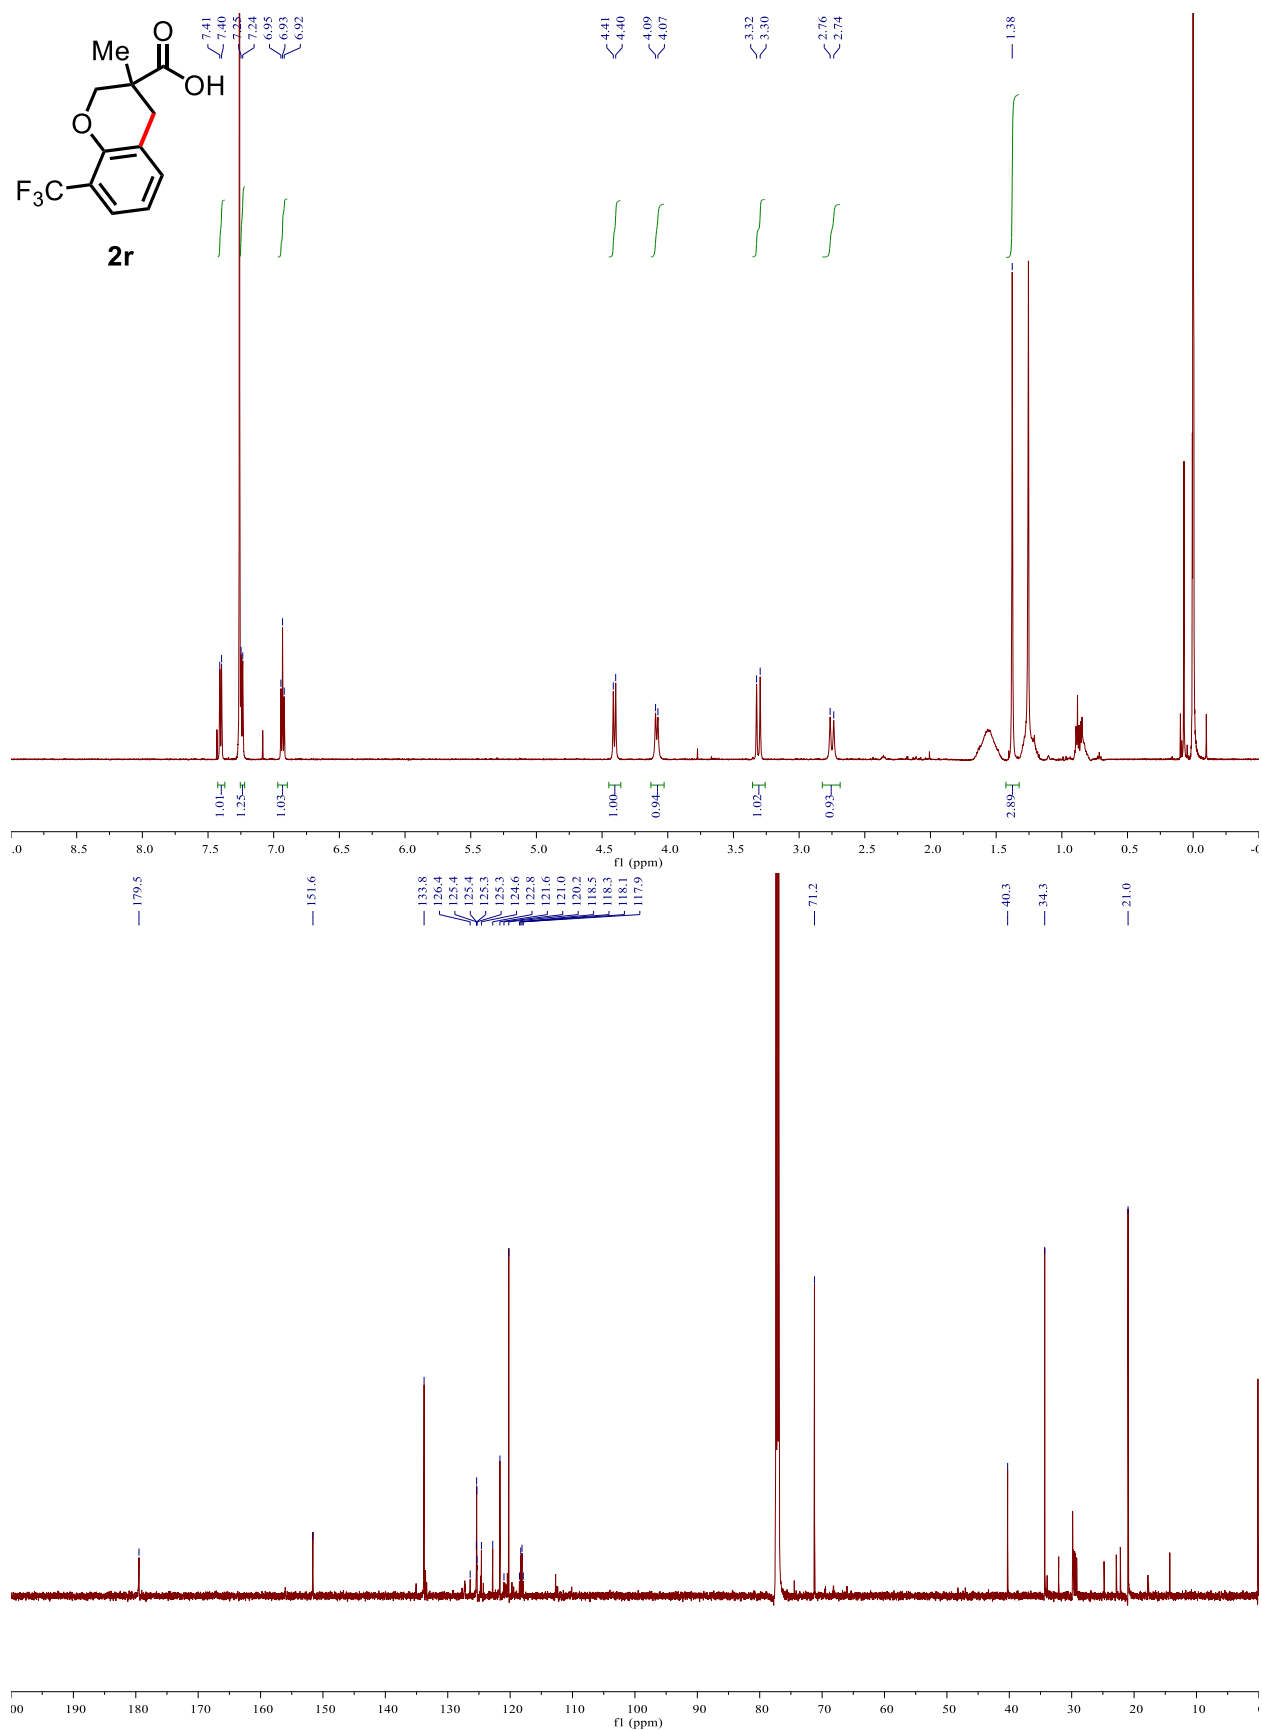

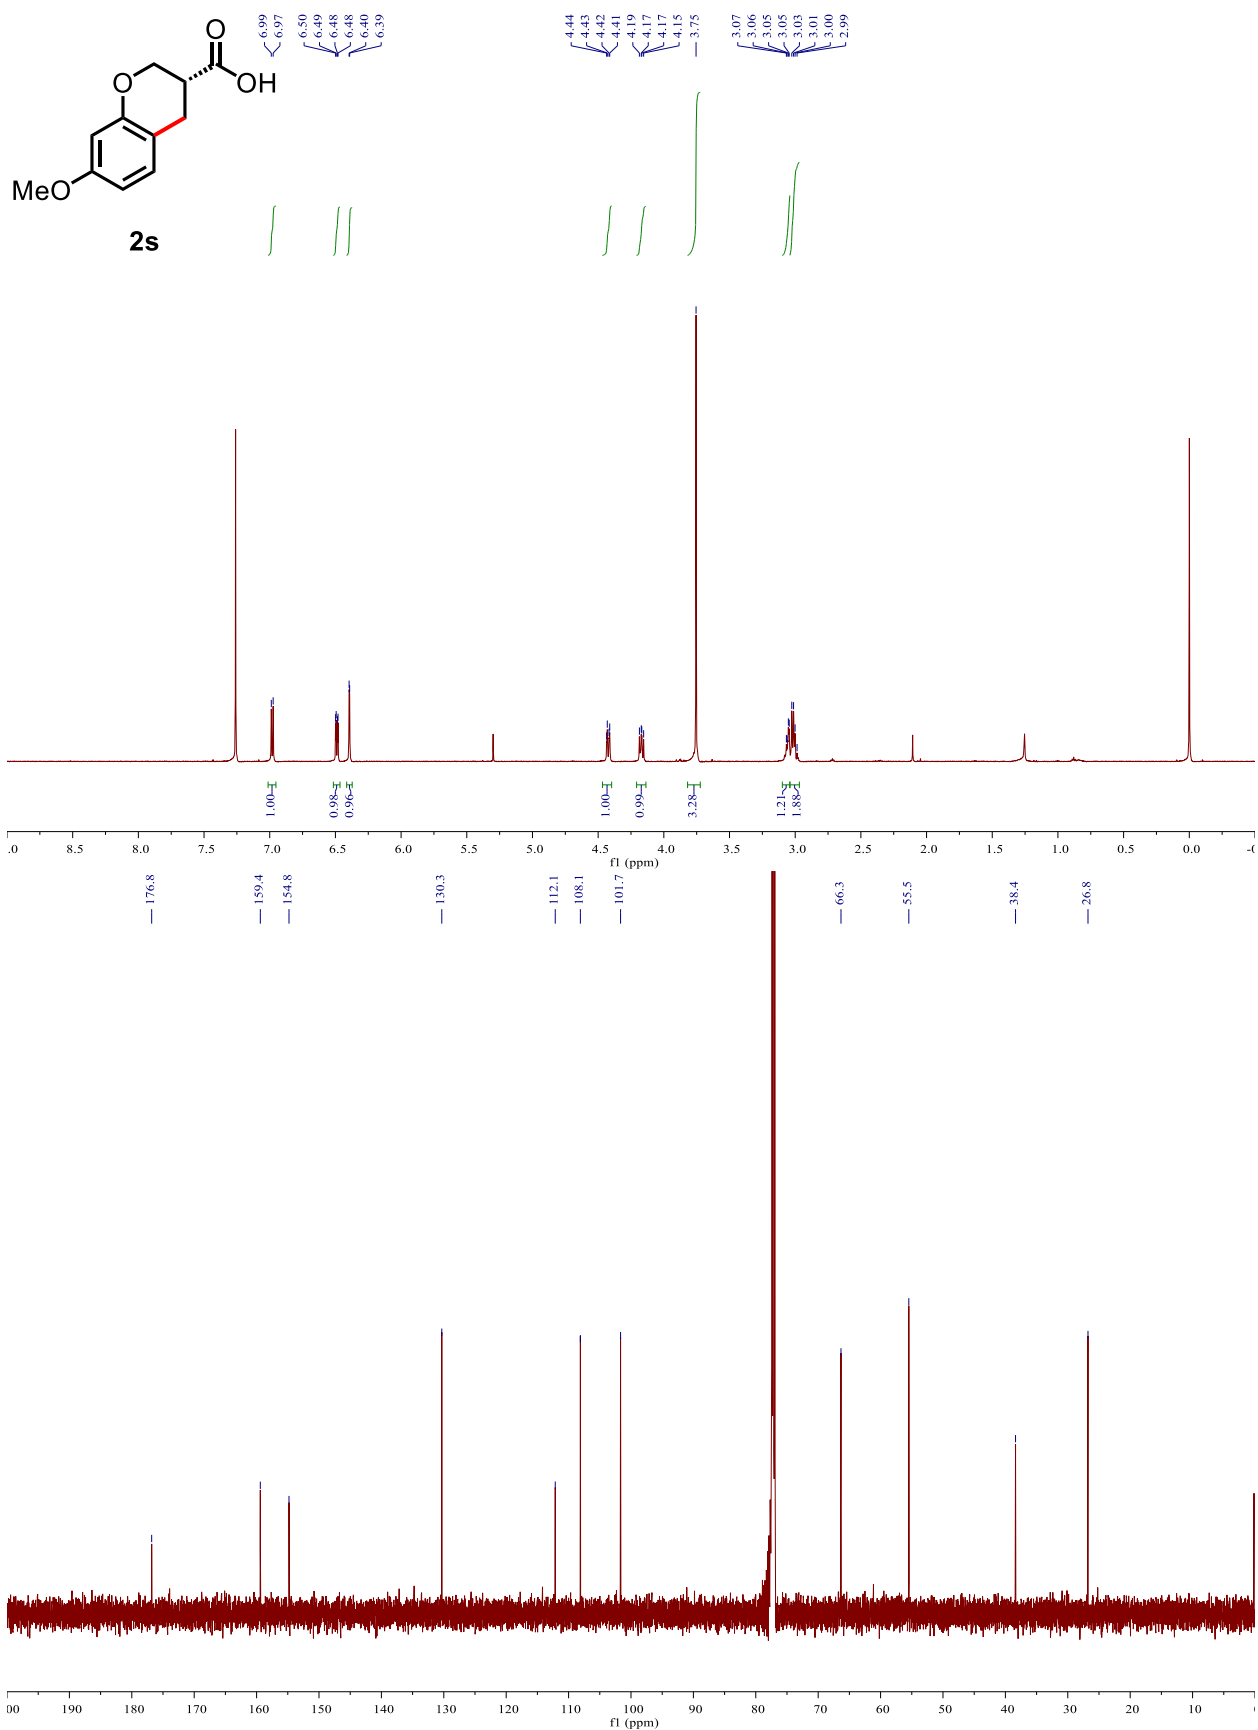

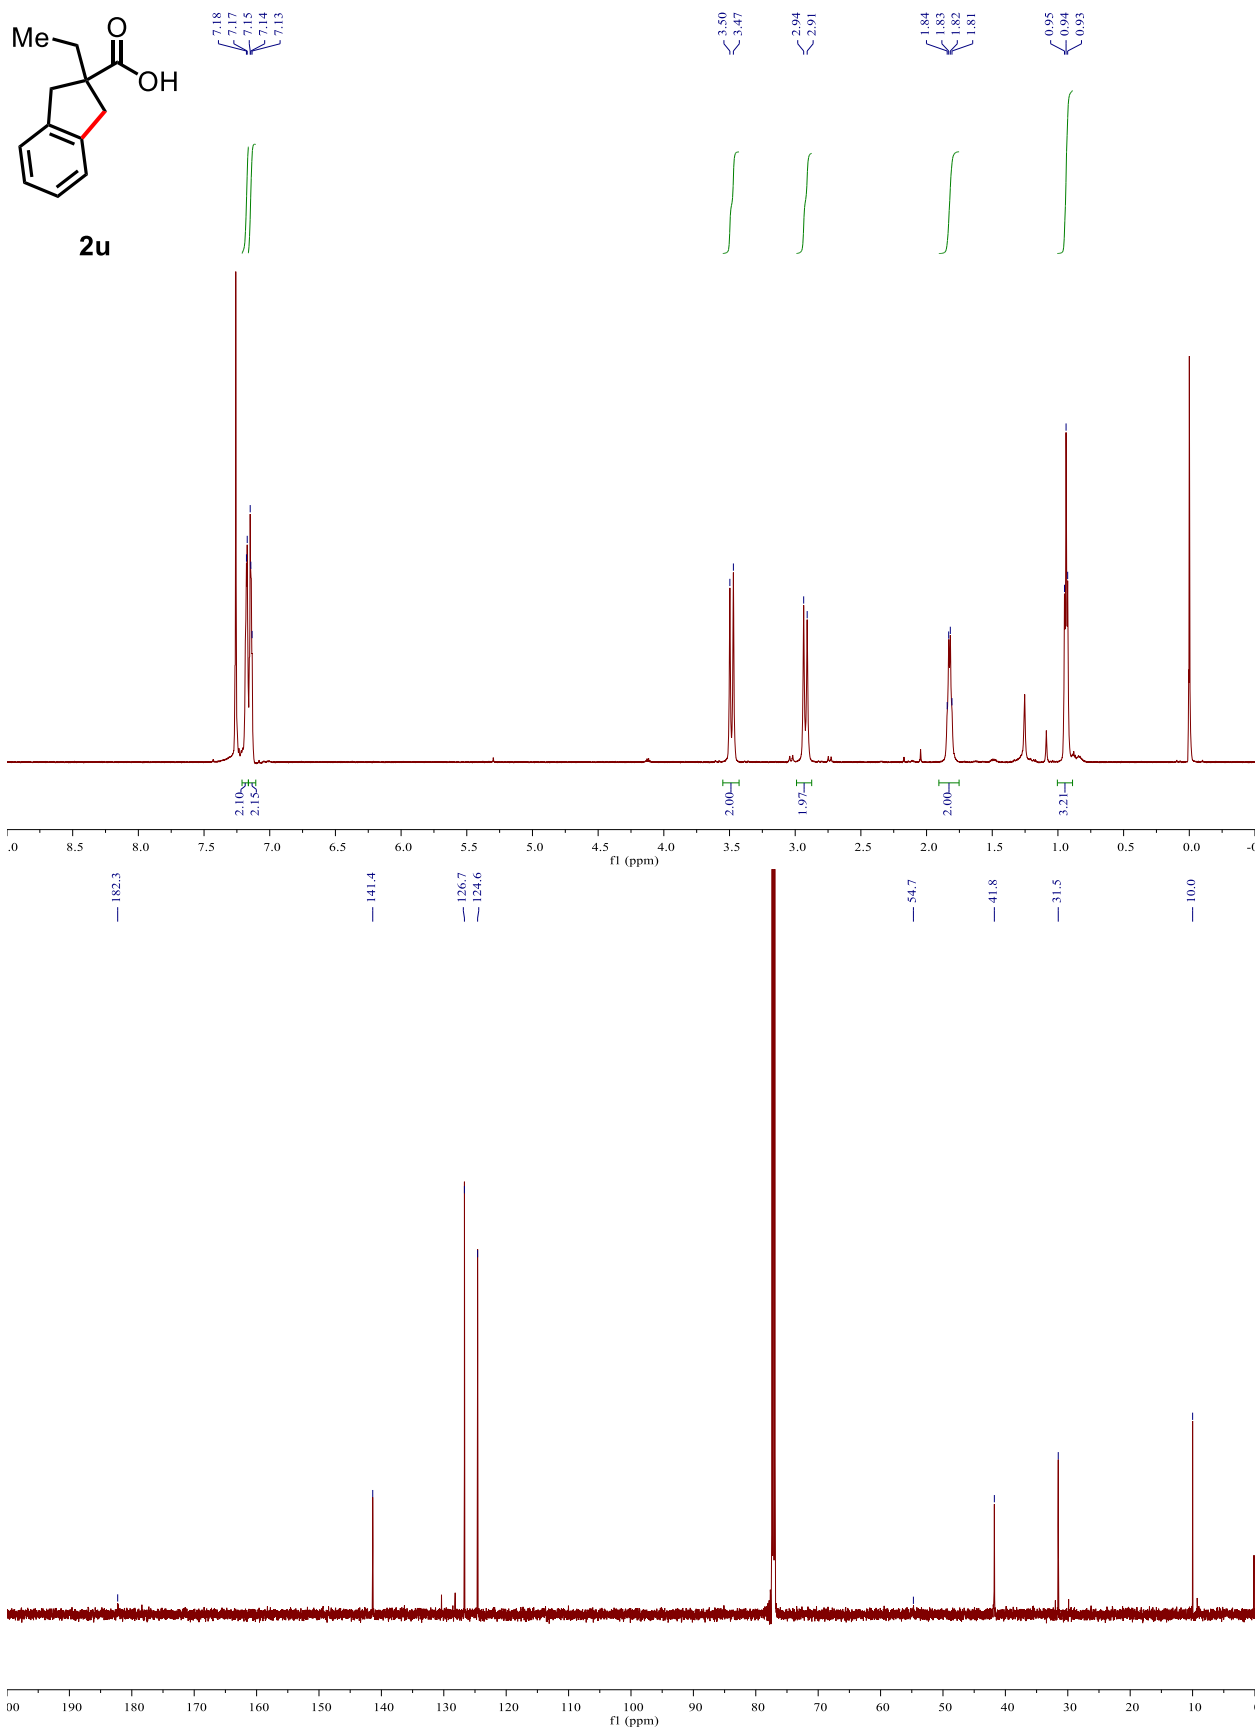

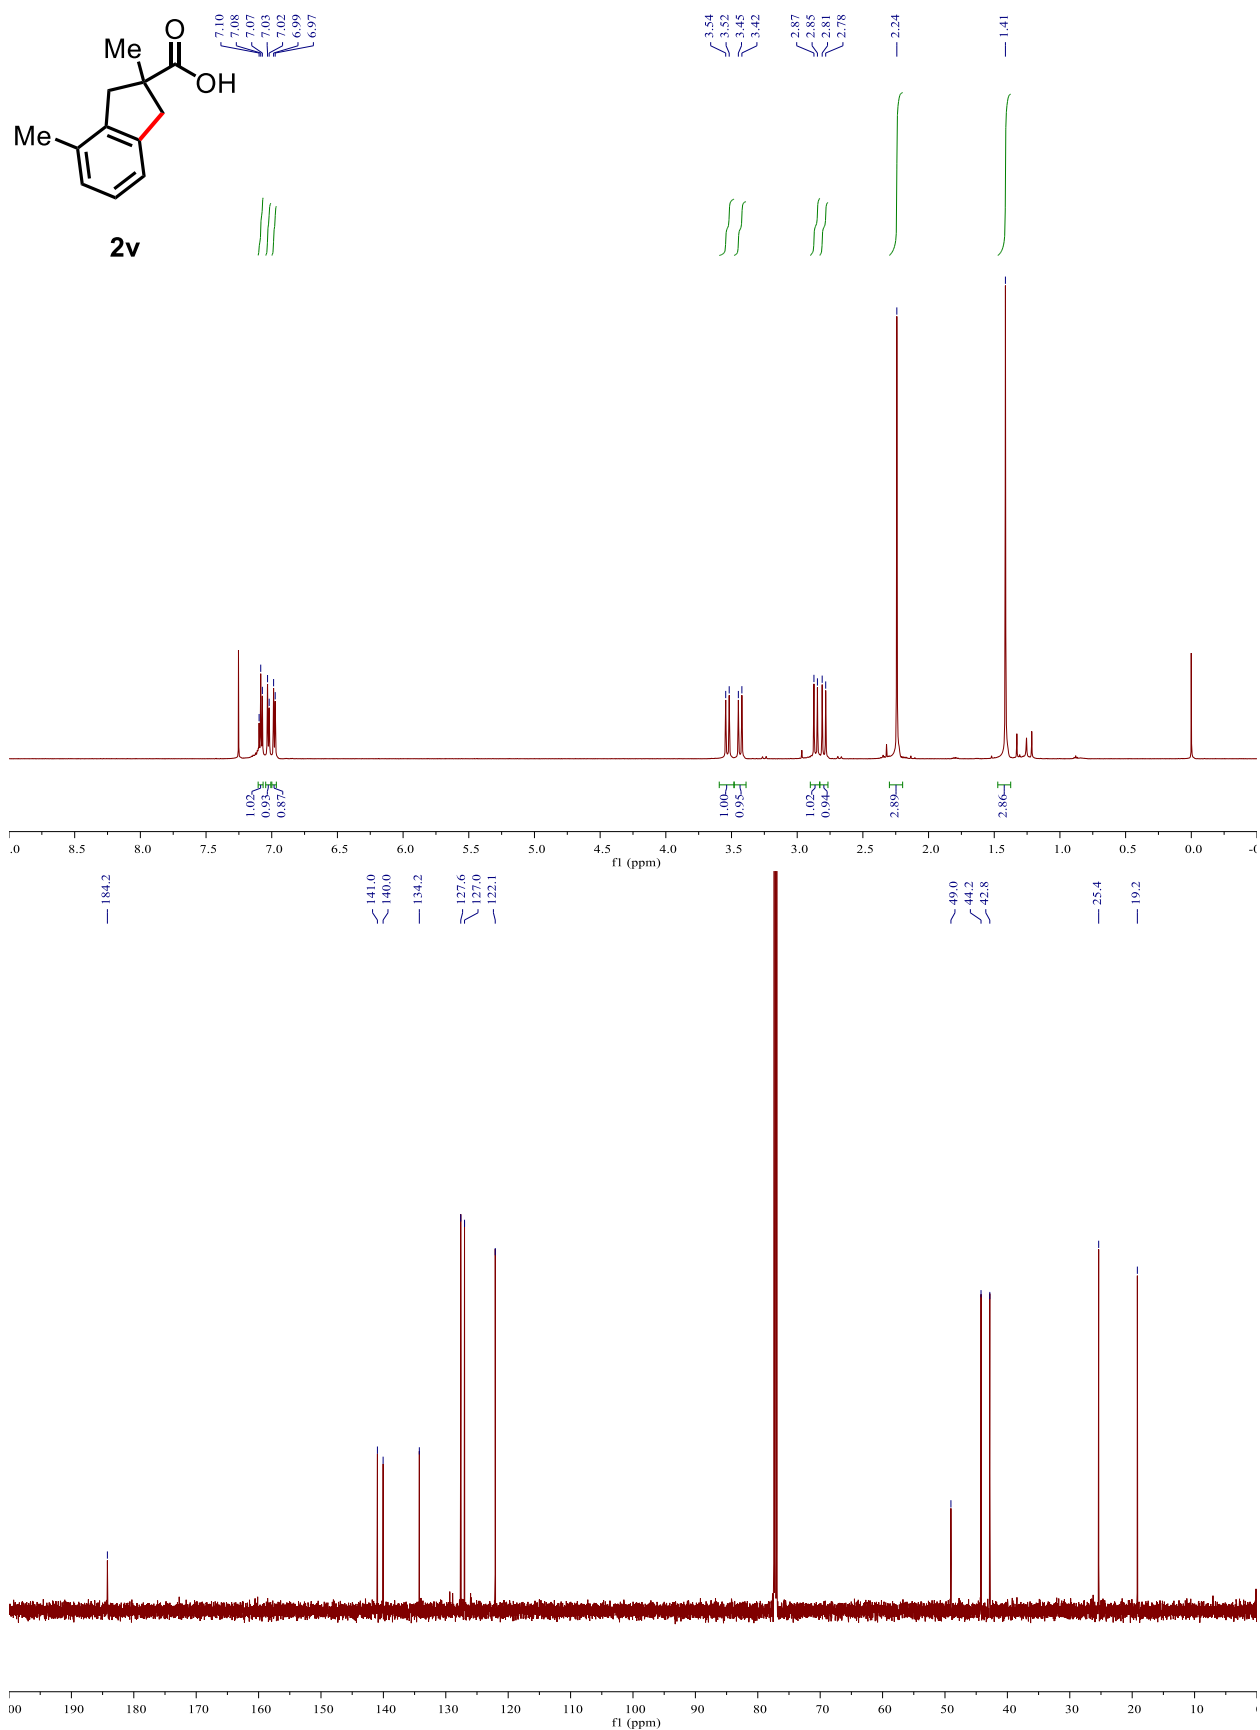

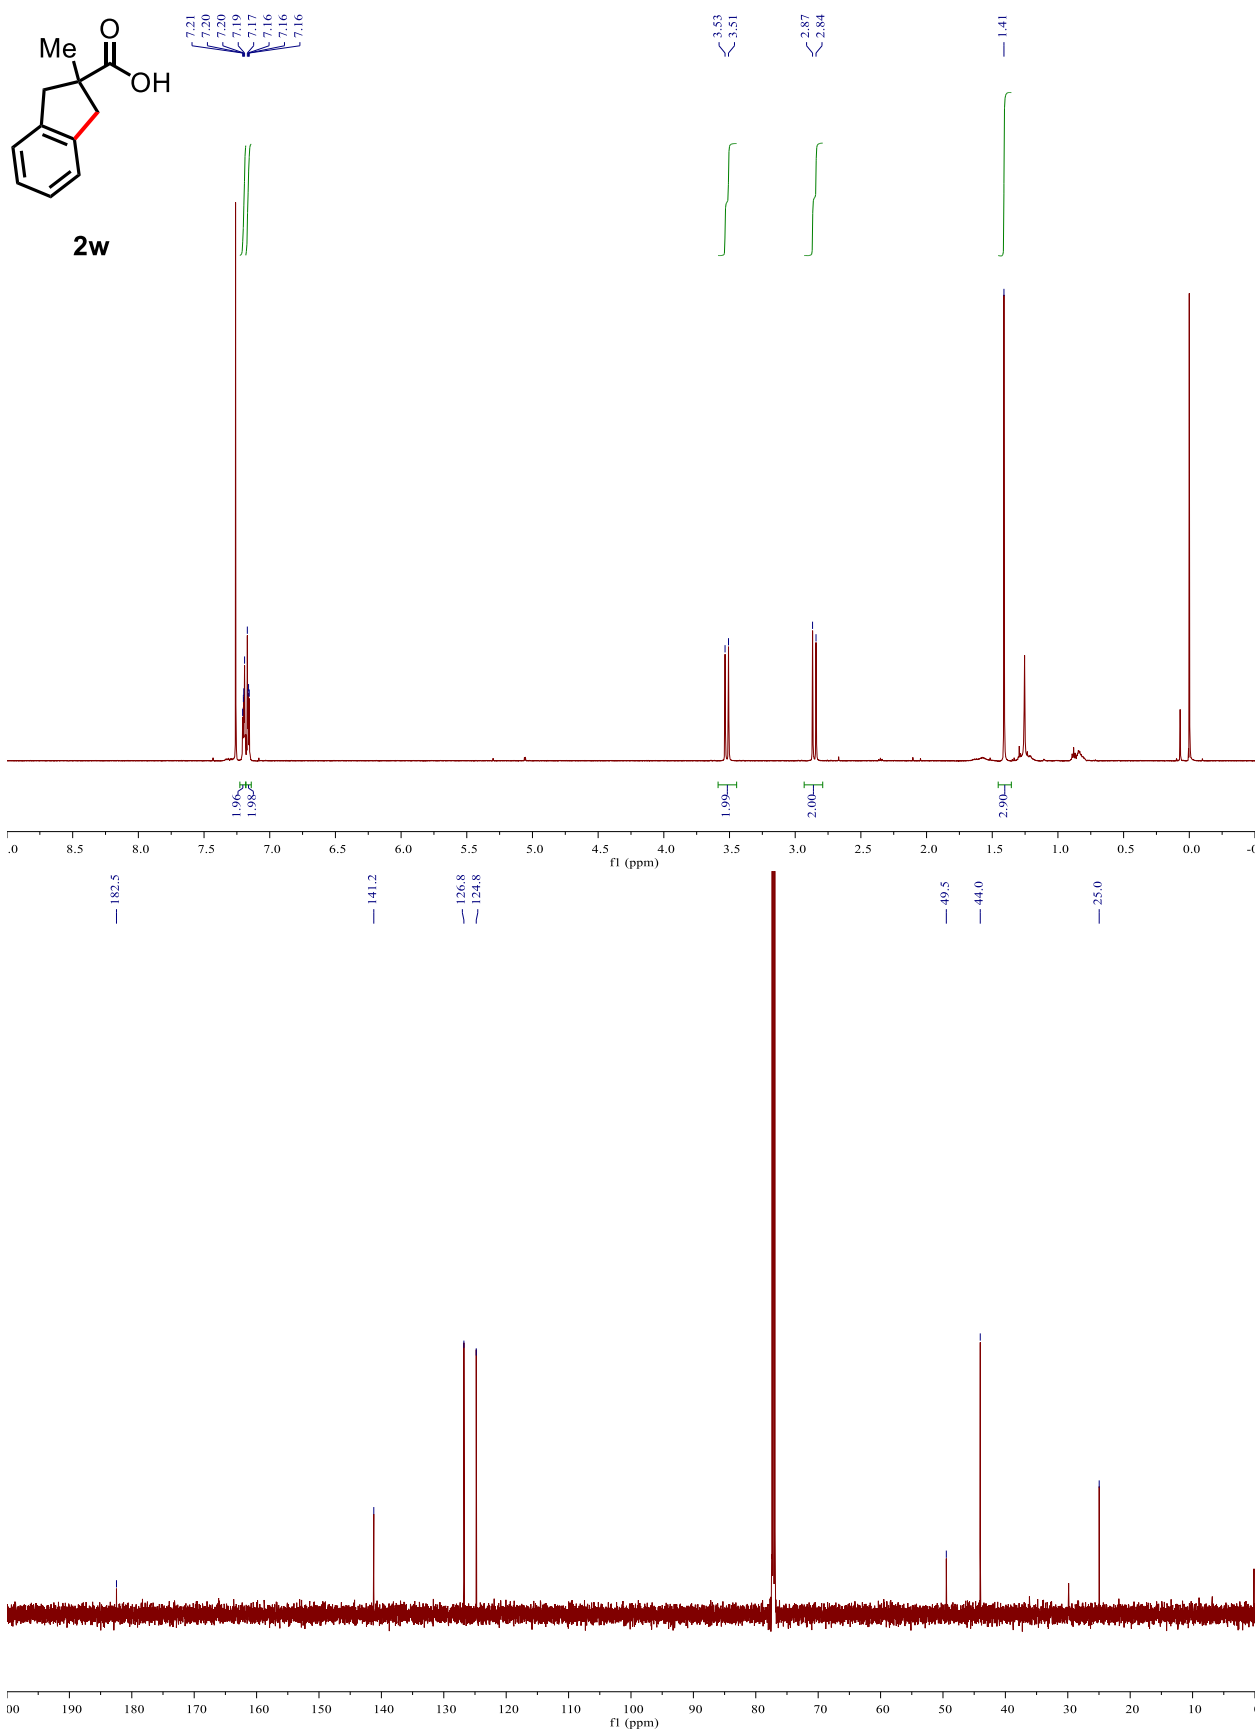

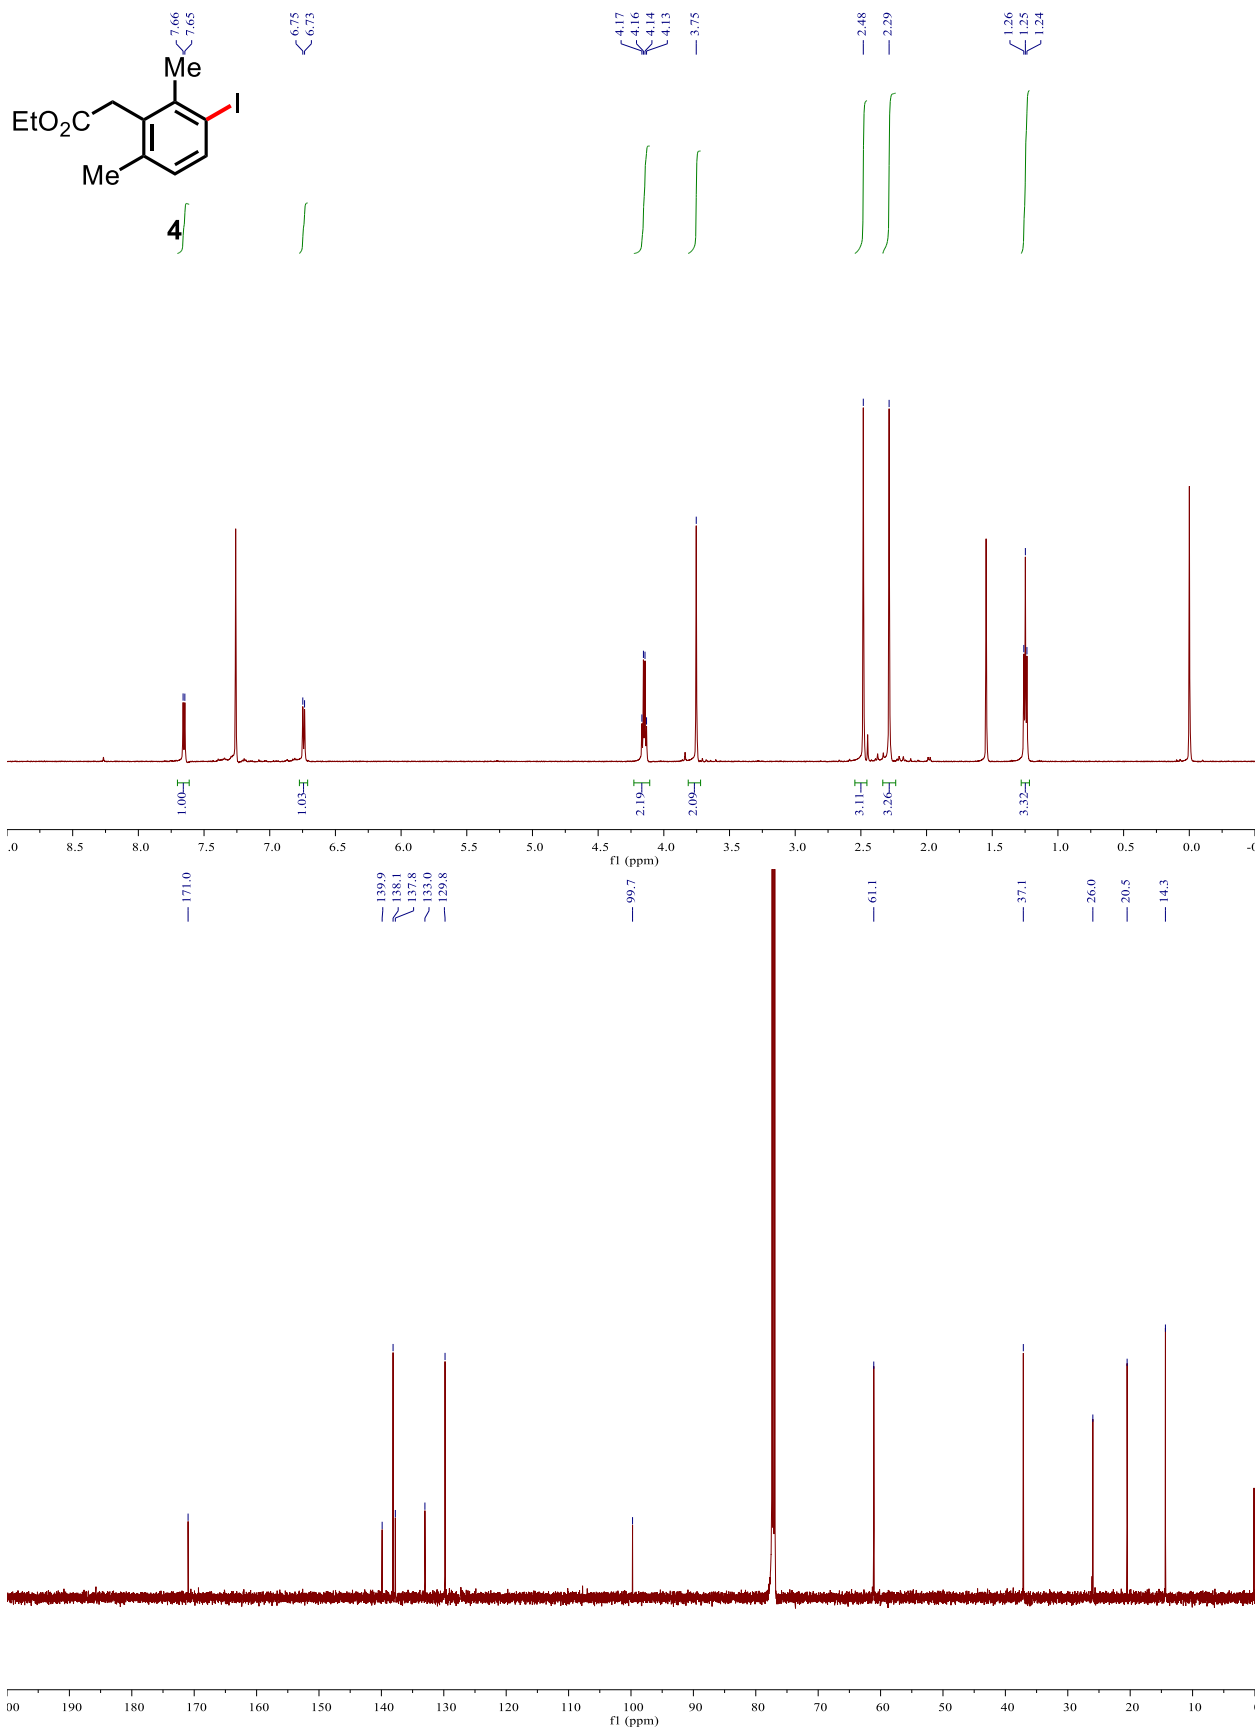

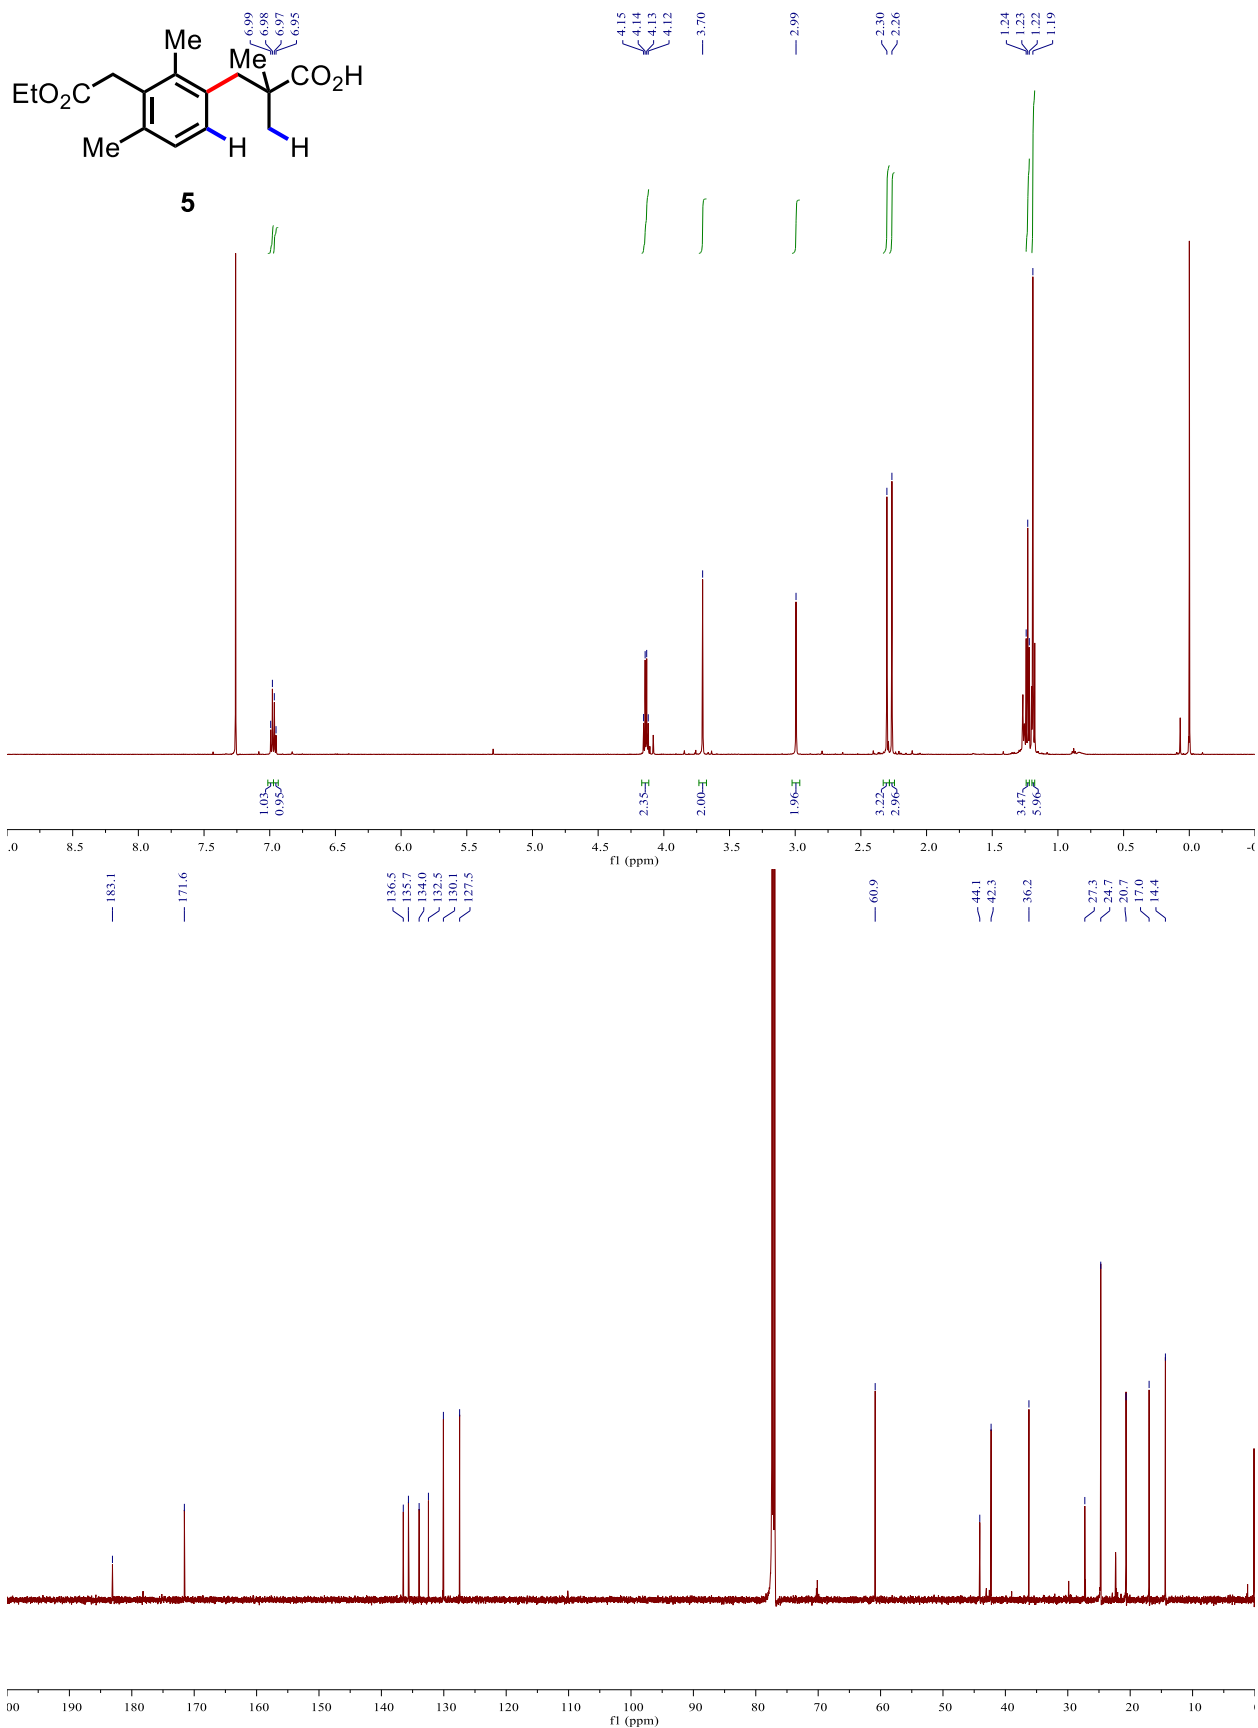

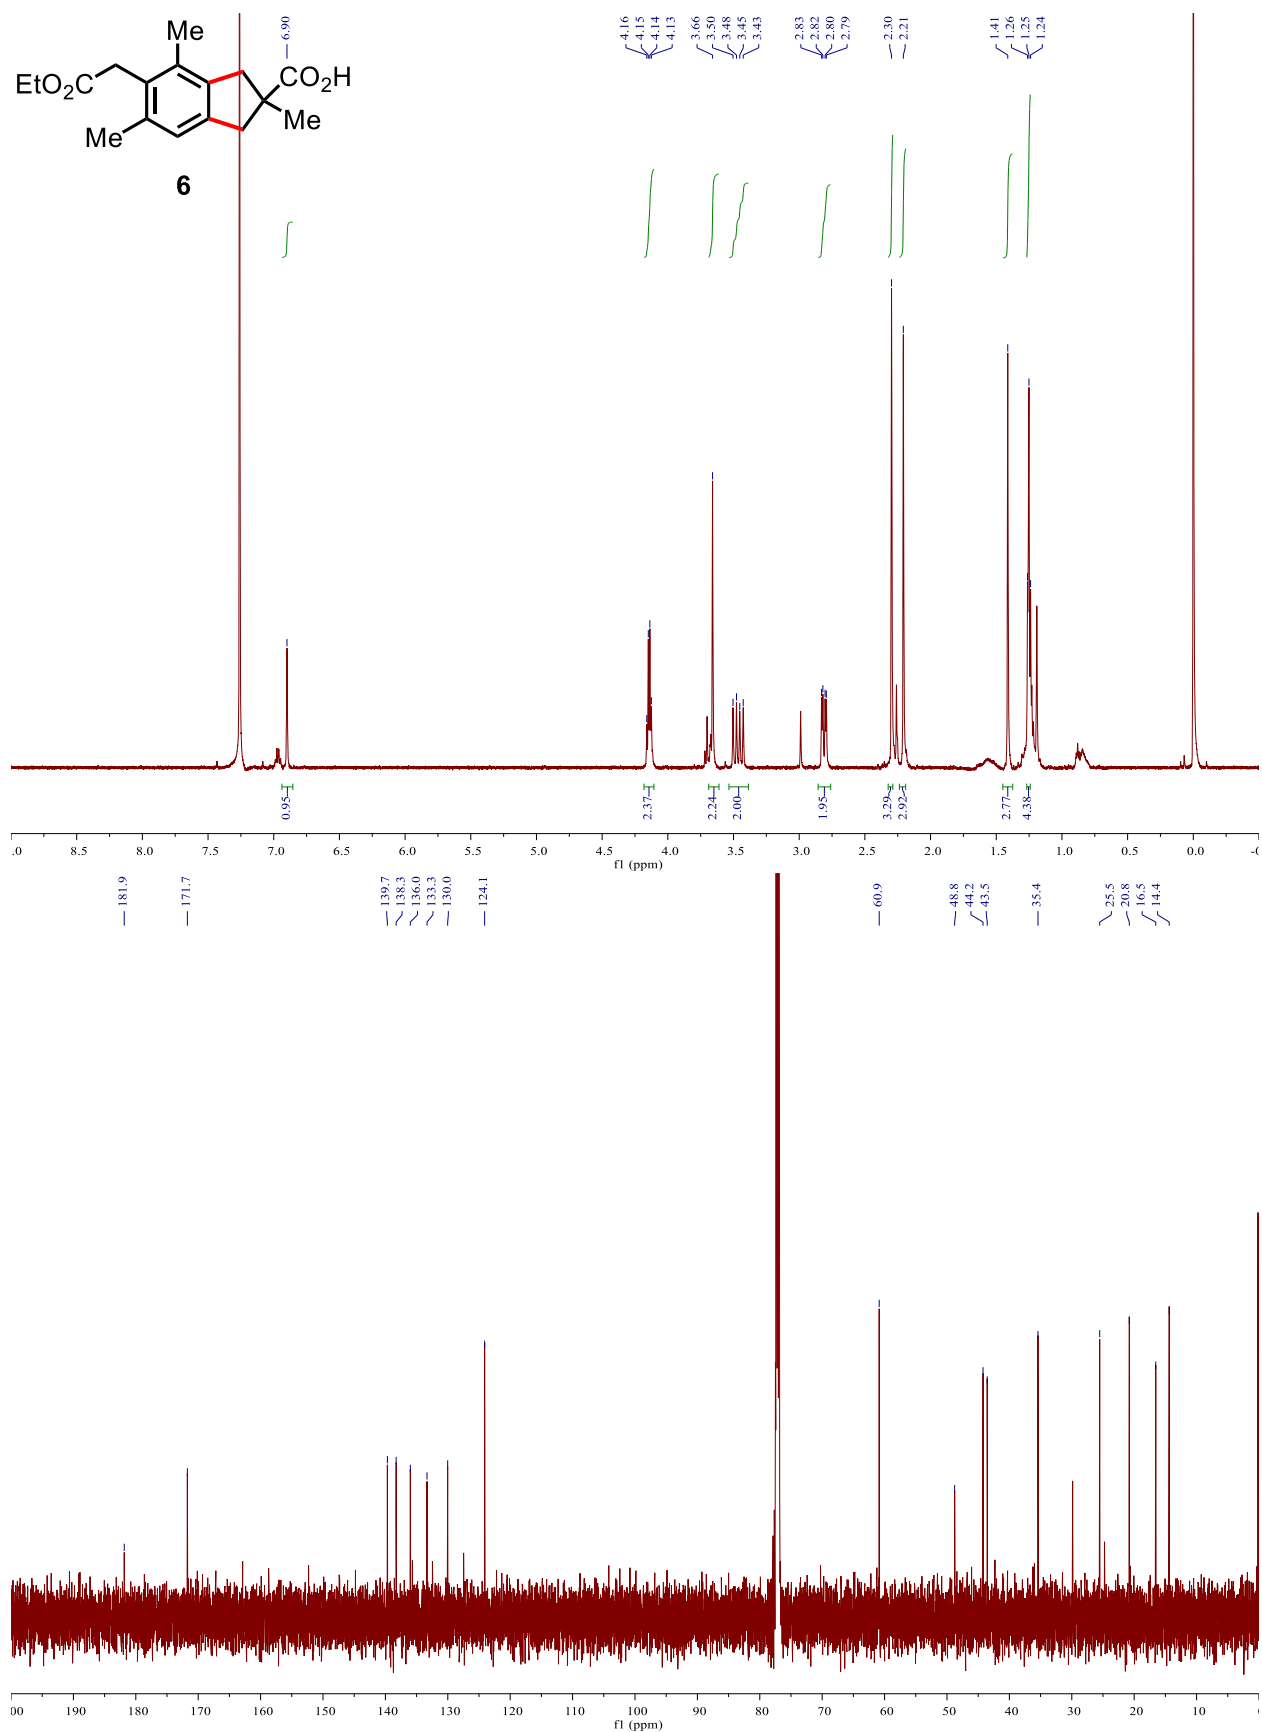

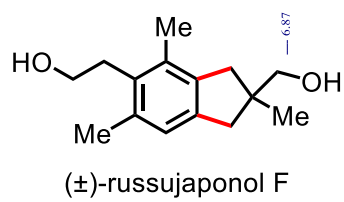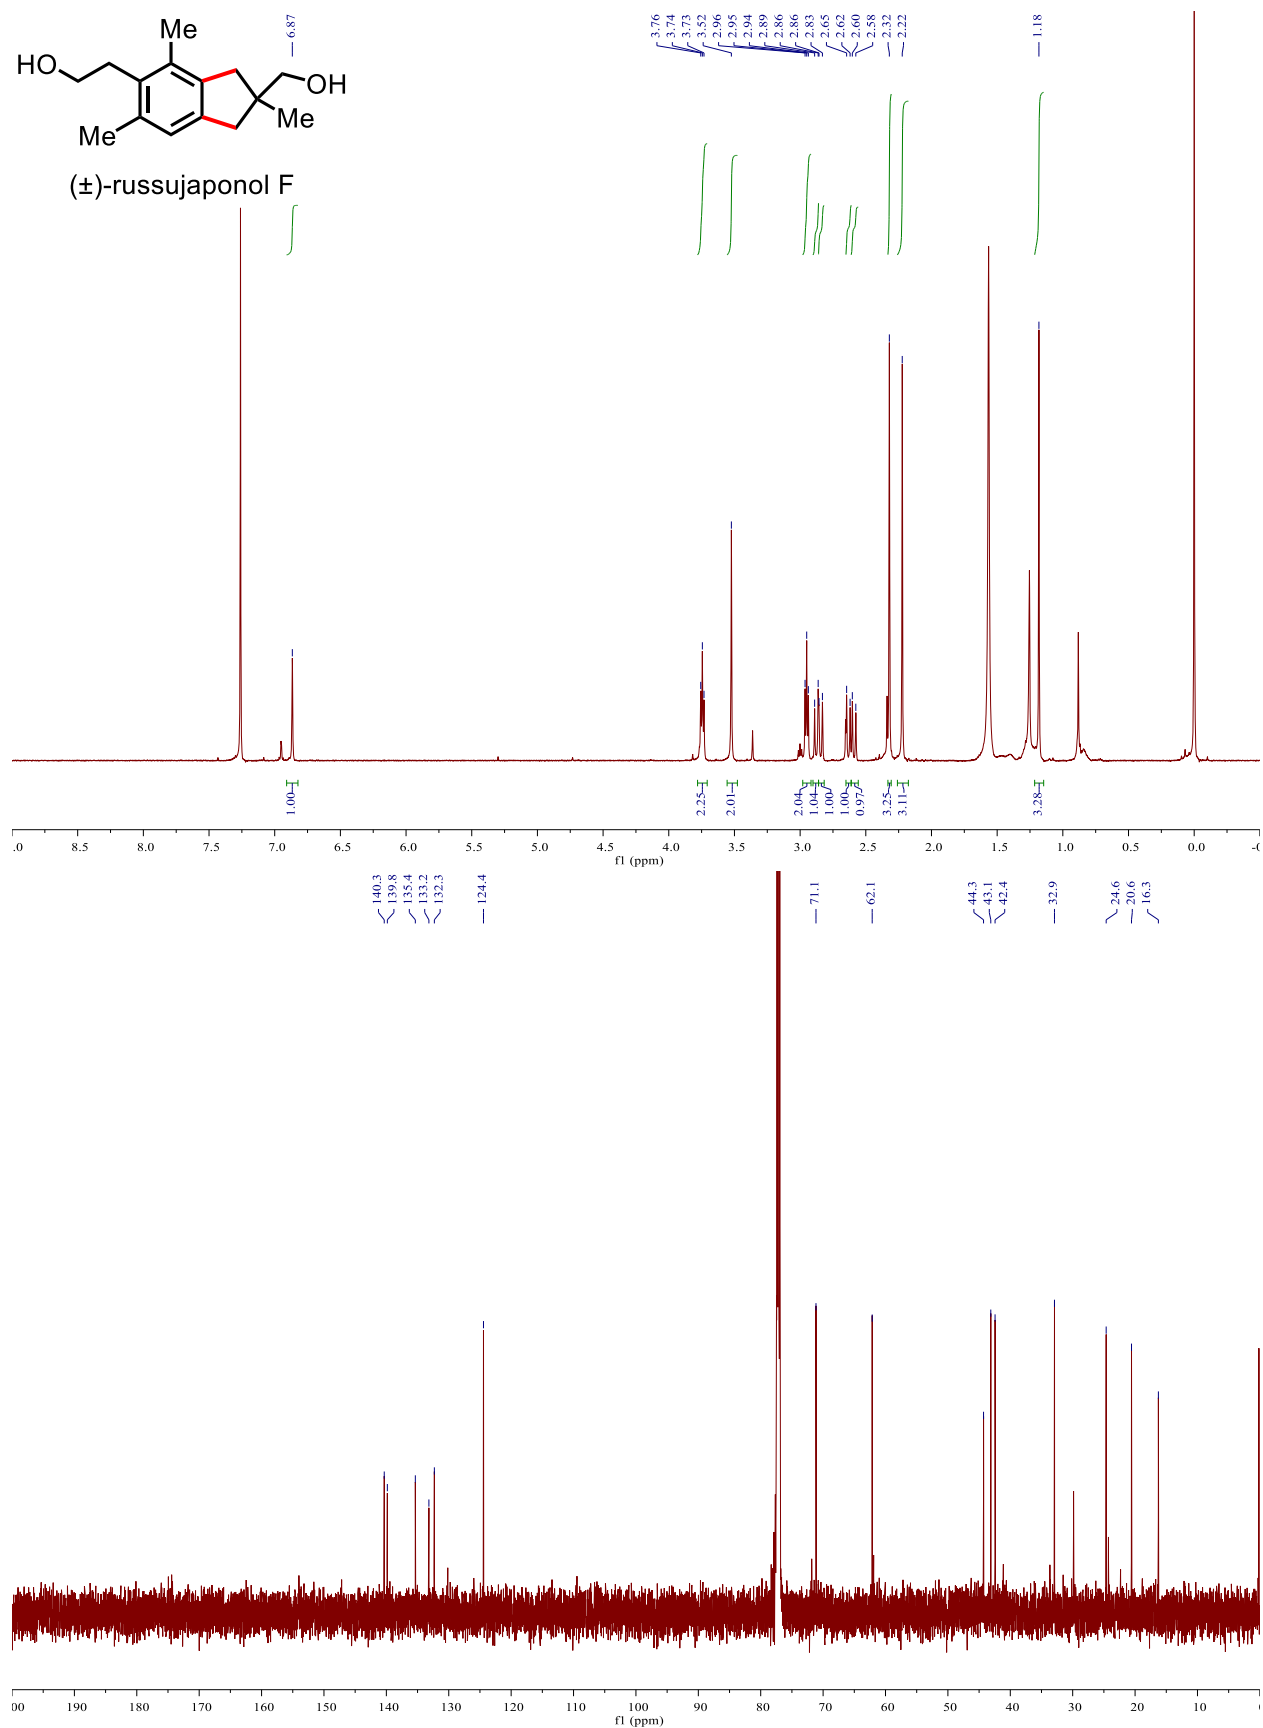

Supplement: NIHMS1682000-supplement-SI.pdf [file NIHMS1682000-supplement-SI.pdf]
